# Supplementary material for: Electrochemical aminotrideuteromethylthiolation of isocyanides with anilines and CD3SSO3Na
Source: Royal Society of Chemistry journal article supplement (doi:10.1039/d4qo00858h), 2024-01-01

Electrochemical aminotrideuteromethylthiolation of isocyanides  
with anilines and CD<sub>3</sub>SSO<sub>3</sub>Na

Lin Zhao,<sup>1</sup> Xinyu Zhou,<sup>1</sup> Kemeng Zhang,<sup>1</sup> Siyu Han,<sup>1</sup> Ge Wu,<sup>\*1,2</sup>

<sup>a</sup>State Key Laboratory of Macromolecular Drugs and Large-scale Manufacturing,  
School of Pharmaceutical Sciences, Wenzhou Medical University, Wenzhou 325035,  
China

<sup>b</sup>State Key Laboratory of Structural Chemistry, Fujian Institute of Research on the  
Structure of Matter, Chinese Academy of Sciences, Fuzhou, Fujian 350002, China

\*E-mail: wuge@wmu.edu.cn

**Table of Contents**

|                                                                                          |                |
|------------------------------------------------------------------------------------------|----------------|
| <b>(1) General considerations, experimental data.....</b>                                | <b>S2-S21</b>  |
| <b>(2) <sup>1</sup>H, <sup>13</sup>C and <sup>19</sup>F NMR spectra of products.....</b> | <b>S22-S57</b> |
| <b>(3) HRMS spectra of products.....</b>                                                 | <b>S58-S74</b> |

## General Information

Anilines and tert-butyl isocyanide were purchased from Energy Chemical Company in China.  $^1\text{H}$  NMR (500 MHz),  $^{13}\text{C}$  NMR (125 MHz) and  $^{19}\text{F}$  NMR (470 MHz) spectra were recorded in  $\text{CDCl}_3$  and  $\text{DMSO}-d_6$  solutions using a Bruker AVANCE 500 spectrometer. High-resolution mass spectra were recorded on an ESI-Q-TOF mass spectrometer. Analysis of crude reaction mixture was done on the Varian 4000 GC/MS and 1200 LC. All reactions were conducted using standard Schlenk techniques. Column chromatography was performed using EM silica gel 60 (300–400  $\mu\text{m}$ ). Cyclic voltammetry data were measured with a Shanghai Chenhua potentiostat (CHI660E). All the electrochemical synthetic experiments were carried out in Ika stirrer. .

## General Experimental Procedures

### Typical procedure for the preparation of **4a**:

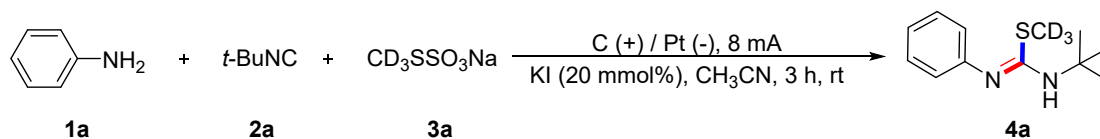

aniline (**1a**, 0.3 mmol), *t*-BuNC (**2a**, 0.3 mmol), CD<sub>3</sub>SSO<sub>3</sub>Na (**3a**, 0.6 mmol), KI (0.06 mmol) and MeCN (6 mL) were sequentially added to a 15 mL Single neck quartz glass that equipped with a magnetic stirrer bar and sealed with rubber plugs under air atmosphere. A carbon rod (Φ 6 mm) anode and a platinum electrode (10 mm×10 mm×0.3 mm) were used as the cathode in the bottle. About 1.0 cm of the carbon rod and platinum was under the solution. The reaction mixture was stirred and electrolyzed at a constant current of 8 mA under air at room temperature for 3 hours. After completion of the reaction, the solution was concentrated in vacuum. The resulting crude mixture was purified by flash column chromatography to give the desired product **4a**.

## Mechanistic Studies

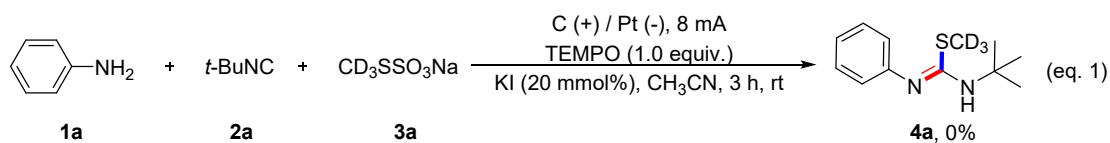

aniline (**1a**, 0.3 mmol), *t*-BuNC (**2a**, 0.3 mmol), CD<sub>3</sub>SSO<sub>3</sub>Na (**3a**, 0.6 mmol), TEMPO (0.3 mmol), KI (0.06 mmol) and MeCN (6 mL) were sequentially added to a 15 mL Single neck quartz glass that equipped with a magnetic stirrer bar and sealed with rubber plugs under air atmosphere. A carbon rod (Φ 6 mm) anode and a platinum electrode (10 mm×10 mm×0.3 mm) were used as the cathode in the bottle. About 1.0 cm of the carbon rod and platinum was under the solution. The reaction mixture was stirred and electrolyzed at a constant current of 8 mA under air at room temperature for 3 hours. After completion of the reaction, and the reaction was filtered through a pad of Celite and diluted with ethyl acetate (10 mL), none of **4a** was detected by GC-MS.

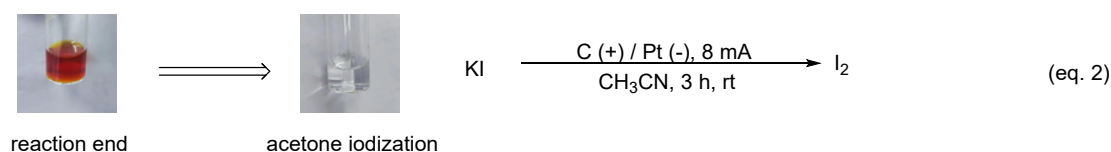

KI (0.06 mmol) and MeCN (6 mL) were sequentially added to a 15 mL Single neck quartz glass that equipped with a magnetic stirrer bar and sealed with rubber plugs under air atmosphere. A carbon rod (Φ 6 mm) anode and a platinum electrode (10 mm×10 mm×0.3 mm) were used as the cathode in the bottle. About 1.0 cm of the carbon rod and platinum was under the solution. The reaction mixture was stirred and electrolyzed at a constant current of 8 mA under air at room temperature for 3 hours. After completion of the reaction, we noticed that the solution turned brown, and then we performed the acetone iodization experiment, and soon the color became colorless. This experimental result confirms that potassium iodide is easily oxidized to iodine.

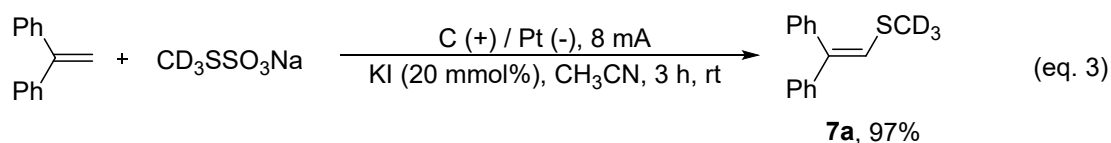

1,1-diphenylethylene (**1a**, 0.3 mmol), CD<sub>3</sub>SSO<sub>3</sub>Na (**3a**, 0.6 mmol), KI (0.06 mmol) and MeCN (6 mL) were sequentially added to a 15 mL Single neck quartz glass that equipped with a magnetic

stirrer bar and sealed with rubber plugs under air atmosphere. A carbon rod ( $\Phi$  6 mm) anode and a platinum electrode (10 mm $\times$ 10 mm $\times$ 0.3 mm) were used as the cathode in the bottle. About 1.0 cm of the carbon rod and platinum was under the solution. The reaction mixture was stirred and electrolyzed at a constant current of 8 mA under air at room temperature for 3 hours. After completion of the reaction, and the reaction was filtered through a pad of Celite and diluted with ethyl acetate (10 mL), **7a** was isolated.

### (2,2-diphenylvinyl)(methyl-d3)sulfane

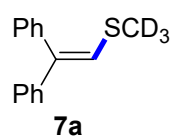

Following the general procedure, using (petroleum ether : EtOAc = 9 : 1) as the eluant afforded a yellow liquid (44.4 mg, 97% yield).  $^1\text{H}$  NMR (400 MHz,  $\text{CDCl}_3$ ):  $\delta$  7.46-7.42 (m, 2H), 7.39-7.25 (m, 8H), 6.60 (s, 1H).  $^{13}\text{C}$  NMR (100 MHz,  $\text{DMSO}-d_6$ ):  $\delta$  141.83, 139.58, 138.50, 129.78, 128.41, 128.33, 127.60, 127.06, 126.93. HRMS (ESI): calcd for  $\text{C}_{15}\text{H}_{12}\text{D}_3\text{S}$   $[\text{M} + \text{H}]^+$  230.1077, found 230.1074.

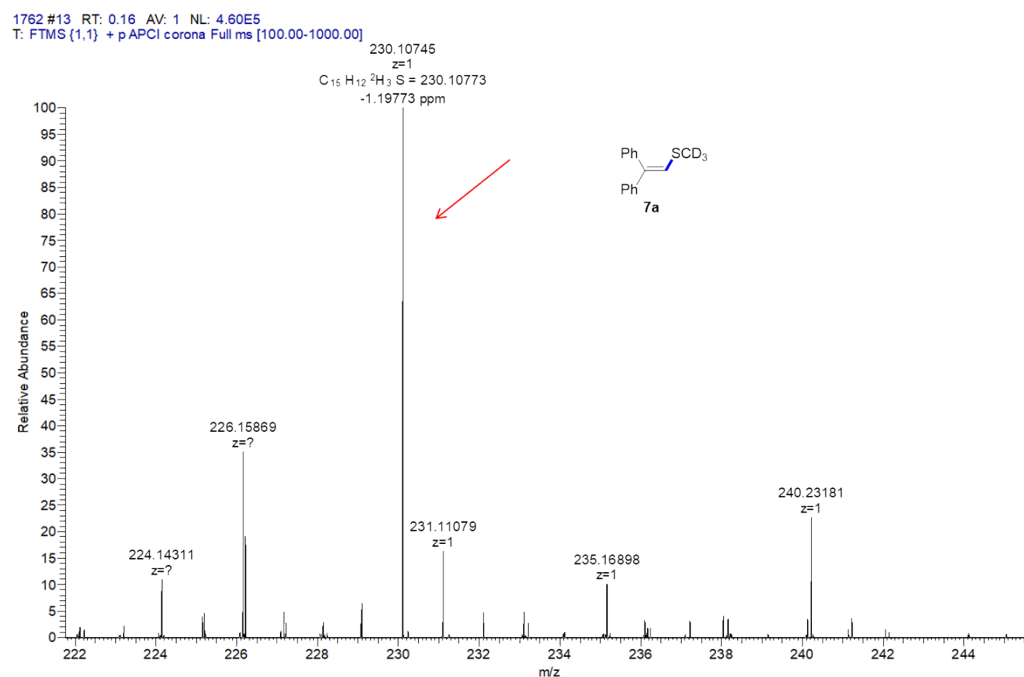

### Cyclic Voltammetry Studies

The cyclic voltammograms were recorded in an electrolyte of  $\text{Bu}_4\text{NPF}_6$  (0.1 M) in  $\text{CH}_3\text{CN}$  using a glassy carbon disk working electrode (diameter, 3 mm), a Pt wire auxiliary electrode and a SCE reference electrode. The scan rate is 100 mV/s.

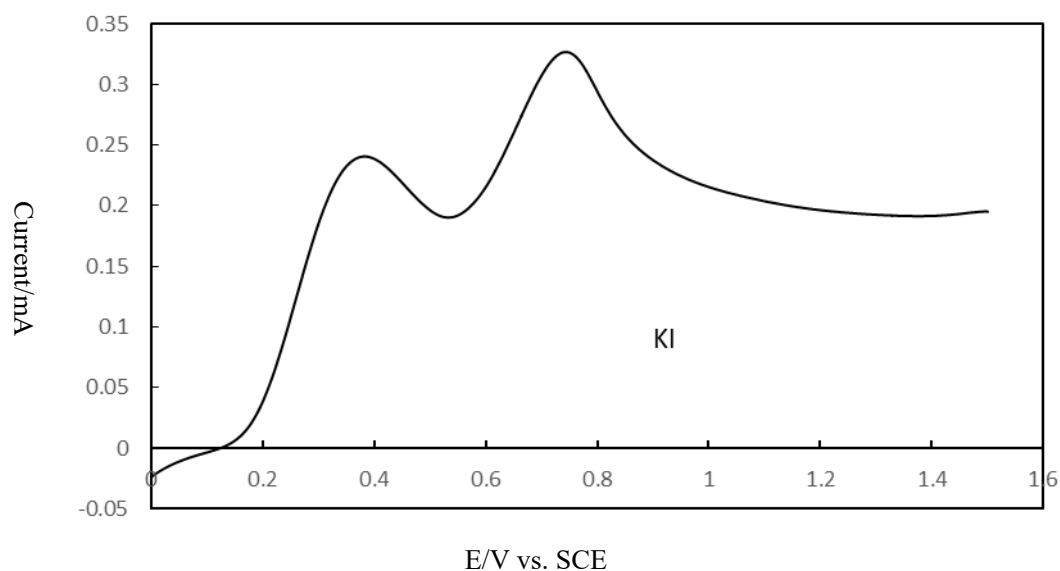

**Figure S1:**

Figure S1: Cyclic voltammogram of 10 mM KI obtained in  $\text{CH}_3\text{CN}$  containing 0.1 M  $\text{Bu}_4\text{NPF}_6$  at a 3 mm diameter planar glassy carbon (GC) electrode and at a scan rate of  $0.1 \text{ V s}^{-1}$  at room temperature. Starting point is 0 v and positive direction of scan.

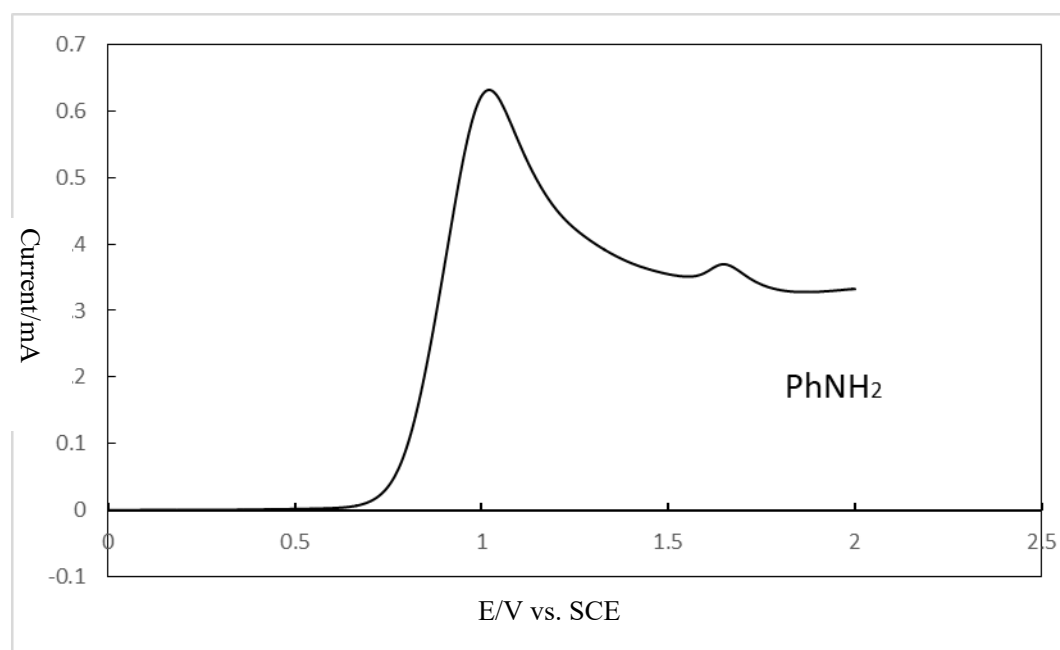

**Figure S2;**

Figure S2: Cyclic voltammogram of 10 mM PhNH<sub>2</sub> obtained in CH<sub>3</sub>CN containing 0.1 M Bu<sub>4</sub>NPF<sub>6</sub> at a 3 mm diameter planar glassy carbon (GC) electrode and at a scan rate of 0.1 V s<sup>-1</sup> at room temperature. Starting point is 0 v and positive direction of scan.

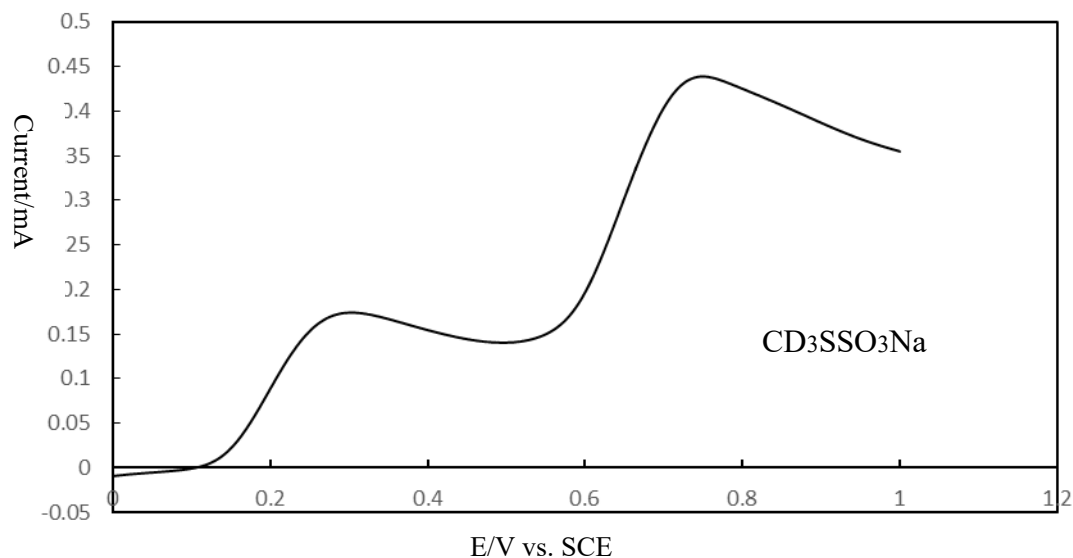

**Figure S3**

Figure S3: Cyclic voltammogram of 10 mM CD<sub>3</sub>SSO<sub>3</sub>Na obtained in CH<sub>3</sub>CN containing 0.1 M Bu<sub>4</sub>NPF<sub>6</sub> at a 3 mm diameter planar glassy carbon (GC) electrode and at a scan rate of 0.1 V s<sup>-1</sup> at room temperature. Starting point is 0 v and positive direction of scan.

## Characterization of Products in Details :

### methyl-d3 (Z)-N-(tert-butyl)-N'-phenylcarbamimidothioate

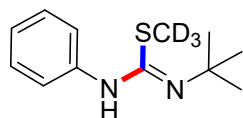

**4a**

Following the general procedure, using (petroleum ether : EtOAc = 9 : 1) as the eluant afforded a yellow liquid (61.5mg, 91% yield). **<sup>1</sup>H NMR** (400 MHz, DMSO-*d*<sub>6</sub>) δ 7.23-7.19 (m, 2H), 6.94-6.89 (m, 1H), 6.75-6.73 (m, 2H), 5.74 (s, 1H), 1.41 (s, 9H). **<sup>13</sup>C NMR** (100 MHz, DMSO-*d*<sub>6</sub>): δ 150.71, 150.20, 128.98, 122.35, 121.94, 52.97, 28.91. **HRMS** (ESI): calcd for C<sub>12</sub>H<sub>16</sub>D<sub>3</sub>N<sub>2</sub>S [M + H]<sup>+</sup> 226.1457, found 226.1458.

### methyl-d3 (Z)-N-(tert-butyl)-N'-(p-tolyl)carbamimidothioate

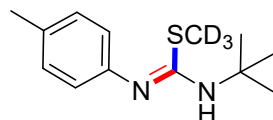

**4b**

Following the general procedure, using (petroleum ether : EtOAc = 9 : 1) as the eluant afforded a yellow liquid (66.0 mg, 92% yield). **<sup>1</sup>H NMR** (400 MHz, Chloroform-*d*) δ 7.30 (s, 1H), 7.10 (d, *J* = 8.0 Hz, 2H), 6.81 (d, *J* = 8.2 Hz, 2H), 2.33 (s, 3H), 1.47 (s, 9H). **<sup>13</sup>C NMR** (100 MHz, DMSO-*d*<sub>6</sub>): δ 150.09, 148.19, 130.57, 129.49, 122.18, 52.91, 28.92, 20.94. **HRMS** (ESI): calcd for C<sub>13</sub>H<sub>18</sub>D<sub>3</sub>N<sub>2</sub>S [M + H]<sup>+</sup> 240.1614, found 240.1623.

### methyl-d3 (Z)-N-(tert-butyl)-N'-(4-isopropylphenyl)carbamimidothioate

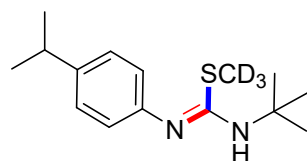

**4c**

Following the general procedure, using (petroleum ether : EtOAc = 9 : 1) as the eluant afforded a yellow liquid (72.1 mg, 90% yield). **<sup>1</sup>H NMR** (400 MHz, DMSO-*d*<sub>6</sub>): δ 7.07 (d, *J* = 8.3 Hz, 2H), 6.65 (d, *J* = 8.3 Hz, 2H), 5.65 (s, 1H), 2.82 (p, *J* = 6.9 Hz, 1H), 1.40 (s, 9H), 1.19 (d, *J* = 6.9 Hz,

6H). **<sup>13</sup>C NMR** (100 MHz, DMSO-*d*<sub>6</sub>): δ 150.00, 148.45, 141.80, 126.74, 122.14, 52.91, 33.32, 28.92, 24.66. **HRMS** (ESI): calcd for C<sub>15</sub>H<sub>22</sub>D<sub>3</sub>N<sub>2</sub>S [M + H]<sup>+</sup> 268.1927, found 268.1933.

**methyl-d3 (Z)-N-(tert-butyl)-N'-(4-fluorophenyl)carbamimidothioate**

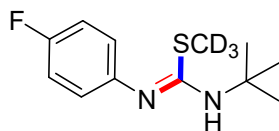

**4d**

Following the general procedure, using (petroleum ether : EtOAc = 9 : 1) as the eluant afforded a yellow liquid (62.0 mg, 85% yield). **<sup>1</sup>H NMR** (400 MHz, DMSO-*d*<sub>6</sub>): δ 7.04-7.00 (m, 2H), 6.74-6.71 (m, 2H), 5.76 (s, 1H), 1.40 (s, 9H). **<sup>13</sup>C NMR** (100 MHz, DMSO-*d*<sub>6</sub>): δ 158.19 (d, *J* = 237.1 Hz), 150.94, 147.23, 123.55 (d, *J* = 7.9 Hz), 115.48 (d, *J* = 21.9 Hz), 53.02, 28.89. **<sup>19</sup>F NMR** (375 MHz, DMSO-*d*<sub>6</sub>) δ -123.00 (1F); **HRMS** (ESI): calcd for C<sub>12</sub>H<sub>15</sub>D<sub>3</sub>N<sub>2</sub>FS [M + H]<sup>+</sup> 244.1363, found 244.1372.

**methyl-d3 (Z)-N-(tert-butyl)-N'-(4-chlorophenyl)carbamimidothioate**

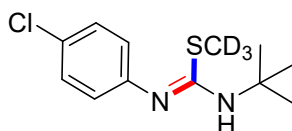

**4e**

Following the general procedure, using (petroleum ether : EtOAc = 9 : 1) as the eluant afforded a yellow liquid (68.4 mg, 88% yield). **<sup>1</sup>H NMR** (400 MHz, DMSO-*d*<sub>6</sub>): δ 7.24 (d, *J* = 8.7 Hz, 2H), 6.74 (d, *J* = 8.6 Hz, 2H), 5.89 (s, 1H), 1.39 (s, 9H). **<sup>13</sup>C NMR** (100 MHz, DMSO-*d*<sub>6</sub>): δ 151.07, 149.70, 128.87, 125.86, 124.08, 53.10, 28.86. **HRMS** (ESI): calcd for C<sub>12</sub>H<sub>15</sub>D<sub>3</sub>N<sub>2</sub>SCl [M + H]<sup>+</sup> 260.1068, found 260.1071.

**methyl-d3 (Z)-N'-(4-bromophenyl)-N-(tert-butyl)carbamimidothioate**

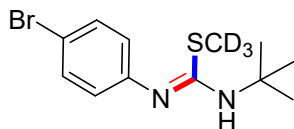

**4f**

Following the general procedure, using (petroleum ether : EtOAc = 9 : 1) as the eluant afforded a yellow solid (79.1 mg, 87% yield), Mp = 70-71 °C. **<sup>1</sup>H NMR** (400 MHz, DMSO-*d*<sub>6</sub>): δ 7.36 (d, *J* = 8.6 Hz, 2H), 6.69 (d, *J* = 8.6 Hz, 2H), 5.90 (s, 1H), 1.39 (s, 9H). **<sup>13</sup>C NMR** (100 MHz, DMSO-*d*<sub>6</sub>): δ 151.01, 150.10, 131.77, 124.60, 113.84, 53.12, 28.86. **HRMS** (ESI): calcd for C<sub>12</sub>H<sub>15</sub>D<sub>3</sub>N<sub>2</sub>SBr [M + H]<sup>+</sup> 304.0562, found 304.0570.

**methyl-d<sub>3</sub> (Z)-N-(tert-butyl)-N'-(4-(tert-butyl)phenyl)carbamimidodithioate**

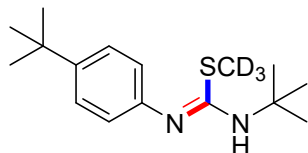

**4g**

Following the general procedure, using (petroleum ether : EtOAc = 9 : 1) as the eluant afforded a yellow liquid (80.1 mg, 95% yield). **<sup>1</sup>H NMR** (400 MHz, DMSO-*d*<sub>6</sub>): δ 7.23 (d, *J* = 8.5 Hz, 2H), 6.67 (d, *J* = 8.4 Hz, 2H), 5.67 (s, 1H), 1.41 (s, 9H), 1.28 (s, 9H). **<sup>13</sup>C NMR** (100 MHz, DMSO-*d*<sub>6</sub>): δ 149.97, 148.06, 144.02, 125.59, 121.85, 52.91, 34.34, 31.90, 28.92. **HRMS** (ESI): calcd for C<sub>16</sub>H<sub>24</sub>D<sub>3</sub>N<sub>2</sub>S [M + H]<sup>+</sup> 282.2083, found 282.2091.

**methyl-d<sub>3</sub> (Z)-N-(tert-butyl)-N'-(4-methoxyphenyl)carbamimidodithioate**

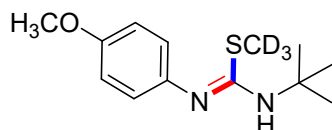

**4h**

Following the general procedure, using (petroleum ether : EtOAc = 9 : 1) as the eluant afforded a yellow solid (70.4 mg, 92% yield), Mp = 54-55 °C. **<sup>1</sup>H NMR** (400 MHz, DMSO-*d*<sub>6</sub>): δ 6.79 (d, *J* = 8.8 Hz, 2H), 6.65 (d, *J* = 8.7 Hz, 2H), 5.59 (s, 1H), 3.71 (s, 3H), 1.39 (s, 9H). **<sup>13</sup>C NMR** (100 MHz, DMSO-*d*<sub>6</sub>): δ 154.85, 150.30, 144.06, 123.07, 114.33, 55.61, 52.90, 28.94. **HRMS** (ESI): calcd for

$C_{13}H_{18}D_3N_2OS$   $[M + H]^+$  256.1563, found 256.1567.

**methyl-d3 (Z)-N-(tert-butyl)-N'-(4-(trifluoromethoxy)phenyl)carbamimidothioate**

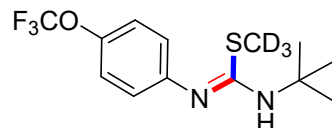

**4i**

Following the general procedure, using (petroleum ether : EtOAc = 9 : 1) as the eluant afforded a yellow liquid (78.8 mg, 85% yield).  $^1H$  NMR (400 MHz, DMSO- $d_6$ ):  $\delta$  7.19 (d,  $J$  = 8.4 Hz, 2H), 6.81 (d,  $J$  = 8.8 Hz, 2H), 5.92 (s, 1H), 1.40 (s, 9H).  $^{13}C$  NMR (100 MHz, DMSO- $d_6$ ):  $\delta$  151.23, 150.06, 143.35, 123.58, 121.94, 53.13, 28.84.  $^{19}F$  NMR (375 MHz, DMSO- $d_6$ )  $\delta$  -57.05 (3F); HRMS (ESI): calcd for  $C_{13}H_{15}D_3N_2OSF_3$   $[M + H]^+$  310.1280, found 310.1271.

**methyl-d3 (Z)-N-(tert-butyl)-N'-(4-((trifluoromethyl)thio)phenyl)carbamimidothioate**

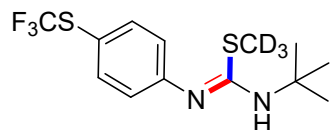

**4j**

Following the general procedure, using (petroleum ether : EtOAc = 9 : 1) as the eluant afforded a yellow solid (79.9 mg, 82% yield), Mp = 55-56°C.  $^1H$  NMR (400 MHz, DMSO- $d_6$ ):  $\delta$  7.53 (d,  $J$  = 8.1 Hz, 2H), 6.88 (d,  $J$  = 8.4 Hz, 2H), 6.13 (s, 1H), 1.40 (s, 9H).  $^{13}C$  NMR (100 MHz, DMSO- $d_6$ ):  $\delta$  153.80, 151.41, 137.63, 123.81, 114.17, 53.27, 28.82.  $^{19}F$  NMR (375 MHz, DMSO- $d_6$ )  $\delta$  -43.18 (3F); HRMS (ESI): calcd for  $C_{13}H_{15}D_3N_2S_2F_3$   $[M + H]^+$  326.1052, found 326.1061.

**methyl-d3 (Z)-N-(tert-butyl)-N'-(o-tolyl)carbamimidothioate**

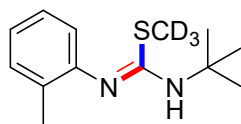

**4k**

Following the general procedure, using (petroleum ether : EtOAc = 9 : 1) as the eluant afforded a yellow liquid (60.3 mg, 84% yield). **<sup>1</sup>H NMR** (400 MHz, DMSO-*d*<sub>6</sub>): δ 7.10 (d, *J* = 7.4 Hz, 1H), 7.04 (td, *J* = 7.6, 1.6 Hz, 1H), 6.84 (td, *J* = 7.4, 1.4 Hz, 1H), 6.64 (dd, *J* = 7.8, 1.4 Hz, 1H), 5.67 (s, 1H), 2.09 (s, 3H), 1.44 (s, 9H). **<sup>13</sup>C NMR** (100 MHz, DMSO-*d*<sub>6</sub>): δ 149.73, 149.56, 130.16, 129.55, 126.48, 122.15, 121.61, 52.88, 28.96, 18.57. **HRMS** (ESI): calcd for C<sub>13</sub>H<sub>18</sub>D<sub>3</sub>N<sub>2</sub>S [M + H]<sup>+</sup> 240.1614, found 240.1617.

**methyl-d3 (Z)-N-(tert-butyl)-N'-(4-(trifluoromethyl)phenyl)carbamimidothioate**

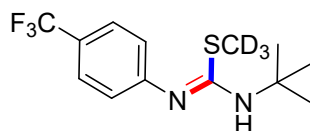

**4l**

Following the general procedure, using (petroleum ether : EtOAc = 9 : 1) as the eluant afforded a yellow liquid (60.6 mg, 69% yield). **<sup>1</sup>H NMR** (400 MHz, DMSO-*d*<sub>6</sub>): δ 7.54 (d, *J* = 8.3 Hz, 2H), 6.91 (d, *J* = 8.2 Hz, 2H), 6.12 (s, 1H), 1.40 (s, 9H). **<sup>13</sup>C NMR** (100 MHz, DMSO-*d*<sub>6</sub>): δ 154.37, 151.48, 126.17 (q, *J* = 4.2 Hz), 125.39 (q, *J* = 269.1 Hz), 122.79, 121.96 (q, *J* = 32.1 Hz), 53.26, 28.81. **<sup>19</sup>F NMR** (375 MHz, DMSO-*d*<sub>6</sub>) δ -59.85 (3F); **HRMS** (ESI): calcd for C<sub>13</sub>H<sub>15</sub>D<sub>3</sub>N<sub>2</sub>SF<sub>3</sub> [M + H]<sup>+</sup> 294.1331, found 294.1335.

**methyl-d3 (Z)-N-(tert-butyl)-N'-(4-morpholinophenyl)carbamimidothioate**

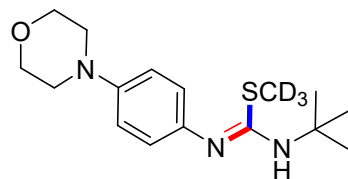

**4m**

Following the general procedure, using (petroleum ether : EtOAc = 9 : 1) as the eluant afforded a

yellow solid (81.9 mg, 88% yield), Mp = 71-72°C. **<sup>1</sup>H NMR** (400 MHz, DMSO-*d*<sub>6</sub>): δ 6.82 (d, *J* = 8.9 Hz, 2H), 6.64 (d, *J* = 8.7 Hz, 2H), 5.56 (s, 1H), 3.74 (t, *J* = 4.6 Hz, 4H), 3.01 (t, *J* = 4.6 Hz, 4H), 1.39 (s, 9H). **<sup>13</sup>C NMR** (100 MHz, DMSO-*d*<sub>6</sub>): δ 149.97, 146.69, 143.40, 122.76, 116.46, 66.74, 52.88, 50.03, 28.96. **HRMS** (ESI): calcd for C<sub>16</sub>H<sub>23</sub>D<sub>3</sub>N<sub>3</sub>OS [M + H]<sup>+</sup> 311.1985, found 311.1990.

**methyl-d<sub>3</sub> (Z)-N-(tert-butyl)-N'-(3,4,5-trimethoxyphenyl)carbamimidothioate**

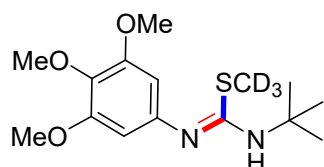

**4n**

Following the general procedure, using (petroleum ether : EtOAc = 9 : 1) as the eluant afforded a yellow solid (85.1 mg, 90% yield), Mp = 67-68°C. **<sup>1</sup>H NMR** (400 MHz, DMSO-*d*<sub>6</sub>): δ 6.02 (s, 2H), 5.64 (s, 1H), 3.73 (s, 6H), 3.62 (s, 3H), 1.41 (s, 9H). **<sup>13</sup>C NMR** (100 MHz, DMSO-*d*<sub>6</sub>): δ 153.30, 150.46, 146.86, 133.09, 99.74, 60.58, 56.15, 52.97, 28.95. **HRMS** (ESI): calcd for C<sub>15</sub>H<sub>22</sub>D<sub>3</sub>N<sub>2</sub>O<sub>3</sub>S [M + H]<sup>+</sup> 316.1774, found 316.1781.

**methyl-d<sub>3</sub> (Z)-N-(tert-butyl)-N'-(4-cyanophenyl)carbamimidothioate**

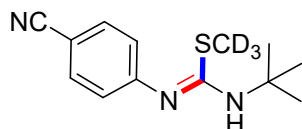

**4o**

Following the general procedure, using (petroleum ether : EtOAc = 9 : 1) as the eluant afforded a yellow solid (56.3 mg, 75% yield), Mp = 57-58°C. **<sup>1</sup>H NMR** (400 MHz, DMSO-*d*<sub>6</sub>): δ 7.63 (d, *J* = 8.5 Hz, 2H), 6.89 (d, *J* = 8.5 Hz, 2H), 6.31 (s, 1H), 1.39 (s, 9H). **<sup>13</sup>C NMR** (100 MHz, DMSO-*d*<sub>6</sub>): δ 155.00, 151.88, 133.38, 123.24, 120.25, 103.43, 53.40, 28.79. **HRMS** (ESI): calcd for C<sub>13</sub>H<sub>15</sub>D<sub>3</sub>N<sub>3</sub>S [M + H]<sup>+</sup> 251.1410, found 251.1416.

**methyl-d<sub>3</sub> (Z)-N-(tert-butyl)-N'-mesitylcarbamimidothioate**

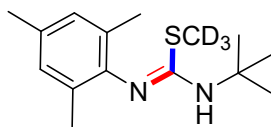

**4p**

Following the general procedure, using (petroleum ether : EtOAc = 9 : 1) as the eluant afforded a yellow solid (61.7 mg, 77% yield), Mp = 49-50°C. **<sup>1</sup>H NMR** (400 MHz, DMSO-*d*<sub>6</sub>): δ 6.74 (s, 2H), 5.46 (s, 1H), 2.18 (s, 3H), 2.01 (s, 6H), 1.47 (s, 9H). **<sup>13</sup>C NMR** (100 MHz, DMSO-*d*<sub>6</sub>): δ 149.65, 146.01, 130.21, 128.51, 52.77, 28.93, 20.91, 18.51. **HRMS** (ESI): calcd for C<sub>15</sub>H<sub>22</sub>D<sub>3</sub>N<sub>2</sub>S [M + H]<sup>+</sup> 268.1927, found 268.1930.

**methyl-d<sub>3</sub> (Z)-N-(tert-butyl)-N'-(2,6-diisopropylphenyl)carbamimidodithioate**

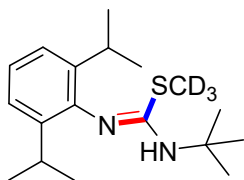

**4q**

Following the general procedure, using (petroleum ether : EtOAc = 9 : 1) as the eluant afforded a yellow liquid (60.3 mg, 65% yield). **<sup>1</sup>H NMR** (400 MHz, DMSO-*d*<sub>6</sub>): δ 7.00 (d, *J* = 7.5 Hz, 2H), 6.89 (dd, *J* = 8.2, 6.9 Hz, 1H), 5.52 (s, 1H), 2.97 (p, *J* = 6.9 Hz, 2H), 1.46 (s, 9H), 1.19 (d, *J* = 6.9 Hz, 6H), 1.06 (d, *J* = 6.9 Hz, 6H). **<sup>13</sup>C NMR** (100 MHz, DMSO-*d*<sub>6</sub>): δ 150.01, 145.95, 139.07, 122.79, 122.62, 52.74, 28.93, 28.02, 24.32, 23.34. **HRMS** (ESI): calcd for C<sub>18</sub>H<sub>28</sub>D<sub>3</sub>N<sub>2</sub>S [M + H]<sup>+</sup> 310.2396, found 310.2402.

**methyl-d<sub>3</sub> (Z)-N-(tert-butyl)-N'-(4-(4,4,5,5-tetramethyl-1,3,2-dioxaborolan-2-yl)phenyl)carbamimidodithioate**

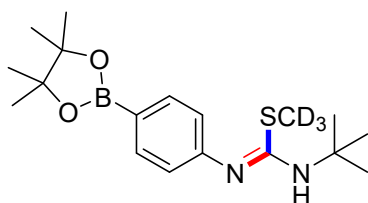

**4r**

Following the general procedure, using (petroleum ether : EtOAc = 9 : 1) as the eluant afforded a yellow solid (94.8 mg, 90% yield), Mp = 58-59°C. **<sup>1</sup>H NMR** (400 MHz, DMSO-*d*<sub>6</sub>): δ 7.53 (d, *J* = 7.8 Hz, 2H), 6.74 (d, *J* = 7.8 Hz, 2H), 5.89 (s, 1H), 1.39 (s, 9H), 1.29 (s, 12H). **<sup>13</sup>C NMR** (100 MHz, DMSO-*d*<sub>6</sub>): δ 153.65, 150.39, 135.65, 121.87, 83.72, 53.08, 28.87, 25.22. **HRMS** (ESI): calcd for C<sub>18</sub>H<sub>27</sub>D<sub>3</sub>BN<sub>2</sub>O<sub>2</sub>S [M + H]<sup>+</sup> 352.2309, found 352.2318.

**methyl-d3 (Z)-N'-(benzo[d]thiazol-2-yl)-N-(tert-butyl)carbamimidothioate**

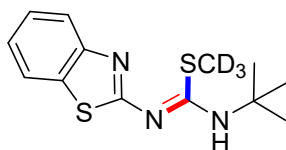

**4s**

Following the general procedure, using (petroleum ether : EtOAc = 9 : 1) as the eluant afforded a yellow solid (66.0 mg, 78% yield), Mp = 106-107°C. **<sup>1</sup>H NMR** (400 MHz, DMSO-*d*<sub>6</sub>): δ 7.83 (d, *J* = 7.8 Hz, 1H), 7.64 (d, *J* = 8.0 Hz, 1H), 7.37 (t, *J* = 7.6 Hz, 1H), 7.24 (t, *J* = 7.5 Hz, 1H), 1.50 (s, 9H). **<sup>13</sup>C NMR** (100 MHz, DMSO-*d*<sub>6</sub>): δ 151.43, 132.25, 126.29, 123.73, 121.83, 120.63, 53.81, 29.38. **HRMS** (ESI): calcd for C<sub>13</sub>H<sub>15</sub>D<sub>3</sub>N<sub>3</sub>S<sub>2</sub> [M + H]<sup>+</sup> 283.1130, found 283.1137.

**methyl-d3 (Z)-N-(4-chlorophenyl)-N'-phenylcarbamimidothioate**

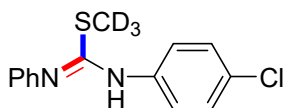

**5a**

Following the general procedure, using (petroleum ether : EtOAc = 9 : 1) as the eluant afforded a yellow liquid (65.3 mg, 78% yield). **<sup>1</sup>H NMR** (400 MHz, DMSO-*d*<sub>6</sub>): δ 8.87 (d, *J* = 28.9 Hz, 1H), 7.76 (dd, *J* = 33.1, 8.2 Hz, 2H), 7.44-7.36 (m, 4H), 7.10 (t, *J* = 7.3 Hz, 1H), 6.96 (dd, *J* = 8.1, 5.4 Hz, 2H). **<sup>13</sup>C NMR** (100 MHz, DMSO-*d*<sub>6</sub>): δ 149.64, 148.91, 141.13, 140.35, 129.21, 129.07, 128.93, 128.76, 123.83, 123.14, 122.93, 121.98, 121.79, 120.74. **HRMS** (ESI): calcd for C<sub>14</sub>H<sub>11</sub>D<sub>3</sub>N<sub>2</sub>SCl [M + H]<sup>+</sup> 280.0755, found 280.0761.

**methyl-d3 (Z)-N'-phenyl-N-(4-(trifluoromethoxy)phenyl)carbamimidothioate**

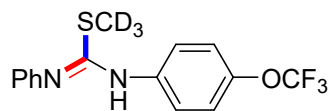

**5b**

Following the general procedure, using (petroleum ether : EtOAc = 9 : 1) as the eluant afforded a yellow liquid (75.0 mg, 76% yield). **<sup>1</sup>H NMR** (400 MHz, DMSO-*d*<sub>6</sub>): δ 8.84 (d, *J* = 41.6 Hz, 1H), 7.78 (d, *J* = 8.5 Hz, 1H), 7.63 (d, *J* = 8.0 Hz, 1H), 7.29-7.23 (m, 4H), 7.00 (t, *J* = 7.4 Hz, 1H), 6.94 (d, *J* = 8.4 Hz, 1H), 6.85 (d, *J* = 7.8 Hz, 1H). **<sup>13</sup>C NMR** (100 MHz, DMSO-*d*<sub>6</sub>): δ 151.30, 150.19, 149.61, 149.25, 143.94, 143.35, 141.11, 140.62, 129.18, 128.90, 124.54, 123.39, 123.14, 122.95, 122.06, 121.97, 121.77, 121.46, 120.77, 119.47. **<sup>19</sup>F NMR** (375 MHz, DMSO-*d*<sub>6</sub>) δ -57.09 (3F); **HRMS** (ESI): calcd for C<sub>15</sub>H<sub>11</sub>D<sub>3</sub>N<sub>2</sub>OF<sub>3</sub>S [M + H]<sup>+</sup> 330.0967, found 330.0970.

**(Z)-1-(11-methyl)-N'-phenyl-N-(o-tolyl)-15-sulfanecarboximidamide**

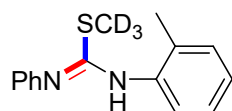

**5c**

Following the general procedure, using (petroleum ether : EtOAc = 9 : 1) as the eluant afforded a yellow solid (55.9 mg, 72% yield), Mp = 47-48°C. **<sup>1</sup>H NMR** (400 MHz, DMSO-*d*<sub>6</sub>): δ 8.63 (s, 1H), 7.69 (d, *J* = 8.0 Hz, 2H), 7.29 (t, *J* = 7.7 Hz, 2H), 7.16 (d, *J* = 7.4 Hz, 1H), 7.10 (t, *J* = 7.6 Hz, 1H), 6.99 (t, *J* = 7.4 Hz, 1H), 6.91 (t, *J* = 7.5 Hz, 1H), 6.72 (d, *J* = 7.7 Hz, 1H), 3.38 (s, 3H). **<sup>13</sup>C NMR** (100 MHz, DMSO-*d*<sub>6</sub>): δ 149.80, 148.70, 141.49, 130.43, 128.93, 126.69, 122.93, 122.76, 121.27, 120.39, 18.54. **HRMS** (ESI): calcd for C<sub>15</sub>H<sub>14</sub>D<sub>3</sub>N<sub>2</sub>S [M + H]<sup>+</sup> 260.1301, found 260.1307.

**(Z)-N-(2,6-diisopropylphenyl)-1-(11-methyl)-N'-phenyl-15-sulfanecarboximidamide**

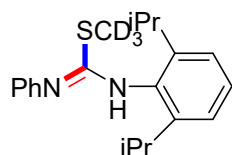

**5d**

Following the general procedure, using (petroleum ether : EtOAc = 9 : 1) as the eluant afforded a yellow liquid (68.1 mg, 69% yield). **<sup>1</sup>H NMR** (400 MHz, DMSO-*d*<sub>6</sub>): δ 8.46 (s, 1H), 7.74 (d, *J* =

8.0 Hz, 2H), 7.31 (t,  $J = 7.7$  Hz, 2H), 7.07 (d,  $J = 7.6$  Hz, 2H), 6.99 (d,  $J = 8.6$  Hz, 2H), 2.99-2.96 (m, 2H), 1.22 (d,  $J = 6.9$  Hz, 6H), 1.10 (d,  $J = 6.8$  Hz, 6H).  $^{13}\text{C}$  NMR (100 MHz, DMSO- $d_6$ ):  $\delta$  149.72, 145.09, 141.65, 138.47, 129.02, 123.28, 123.10, 122.73, 120.17, 28.22, 24.11, 23.50. HRMS (ESI): calcd for  $\text{C}_{20}\text{H}_{24}\text{D}_3\text{N}_2\text{S}$   $[\text{M} + \text{H}]^+$  330.2083, found 330.2093.

**(Z)-N-(2,6-dimethylphenyl)-1-(11-methyl)-N'-phenyl-15-sulfanecarboximidamide**

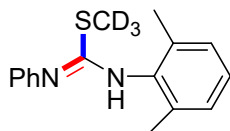

**5e**

Following the general procedure, using (petroleum ether : EtOAc = 9 : 1) as the eluant afforded a yellow solid (55.7 mg, 68% yield), Mp = 40-41 °C.  $^1\text{H}$  NMR (400 MHz, DMSO- $d_6$ ):  $\delta$  8.50 (s, 1H), 7.72 (d,  $J = 7.9$  Hz, 2H), 7.30 (t,  $J = 7.7$  Hz, 2H), 6.99 (d,  $J = 6.8$  Hz, 3H), 6.82 (d,  $J = 7.5$  Hz, 1H), 2.07 (s, 6H).  $^{13}\text{C}$  NMR (100 MHz, DMSO- $d_6$ ):  $\delta$  149.67, 147.67, 141.59, 128.95, 128.11, 122.69, 122.51, 120.46, 18.66. HRMS (ESI): calcd for  $\text{C}_{16}\text{H}_{16}\text{D}_3\text{N}_2\text{S}$   $[\text{M} + \text{H}]^+$  274.1457, found 274.1462.

**benzo[d][1,3]dioxol-5-yl**

**(Z)-4-(((2,6-dimethylphenyl)amino)((methyl-**

**d3)thio)methylene)amino)benzoate**

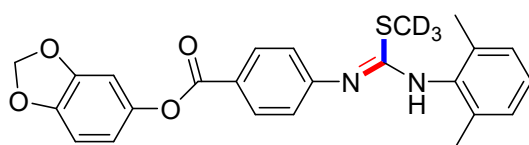

**5f**

Following the general procedure, using (petroleum ether : EtOAc = 9 : 1) as the eluant afforded a yellow solid (86.5 mg, 66% yield), Mp = 51-52 °C.  $^1\text{H}$  NMR (400 MHz, DMSO- $d_6$ ):  $\delta$  9.09 (s, 1H), 8.02 (d,  $J = 28.9$  Hz, 3H), 6.98 (q,  $J = 36.4, 32.3$  Hz, 6H), 6.72 (s, 1H), 6.09 (s, 2H), 2.10 (s, 6H).  $^{13}\text{C}$  NMR (100 MHz, DMSO- $d_6$ ):  $\delta$  164.98, 149.73, 148.17, 147.27, 146.74, 145.59, 145.44, 131.36, 128.22, 127.85, 122.94, 122.11, 119.08, 114.78, 108.44, 104.63, 102.22, 18.65. HRMS (ESI): calcd for  $\text{C}_{24}\text{H}_{20}\text{D}_3\text{N}_2\text{O}_4\text{S}$   $[\text{M} + \text{H}]^+$  438.1567, found 438.1569.

**(Z)-N-(2-chloro-6-methylphenyl)-1-(11-methyl)-N'-phenyl-15-sulfanecarboximidamide**

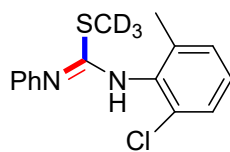

**5g**

Following the general procedure, using (petroleum ether : EtOAc = 9 : 1) as the eluant afforded a yellow liquid (62.4 mg, 71% yield). **<sup>1</sup>H NMR** (400 MHz, DMSO-*d*<sub>6</sub>): δ 8.75 (s, 1H), 7.72 (d, *J* = 7.9 Hz, 2H), 7.31 (t, *J* = 7.6 Hz, 2H), 7.26 (d, *J* = 7.9 Hz, 1H), 7.14 (d, *J* = 7.5 Hz, 1H), 7.03 (t, *J* = 7.5 Hz, 1H), 6.91 (t, *J* = 7.8 Hz, 1H), 2.13 (s, 3H). **<sup>13</sup>C NMR** (100 MHz, DMSO-*d*<sub>6</sub>): δ 152.03, 146.11, 141.20, 131.26, 129.13, 128.95, 127.31, 125.46, 123.48, 123.14, 120.93, 18.87. **HRMS** (ESI): calcd for C<sub>15</sub>H<sub>13</sub>D<sub>3</sub>N<sub>2</sub>SCl [M + H]<sup>+</sup> 294.0911, found 294.0917.

**(Z)-1-(11-methyl)-N'-phenyl-N-(2-phenylpropan-2-yl)-15-sulfanecarboximidamide**

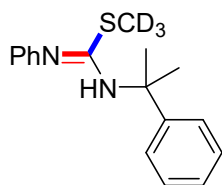

**5h**

Following the general procedure, using (petroleum ether : EtOAc = 9 : 1) as the eluant afforded a yellow solid (73.2 mg, 85% yield), Mp = 49-50°C. **<sup>1</sup>H NMR** (400 MHz, DMSO-*d*<sub>6</sub>): δ 7.42 (d, *J* = 7.9 Hz, 2H), 7.31 (t, *J* = 7.7 Hz, 2H), 7.17 (t, *J* = 7.2 Hz, 1H), 7.09 (t, *J* = 7.7 Hz, 2H), 6.83 (t, *J* = 7.3 Hz, 1H), 6.39 (d, *J* = 7.8 Hz, 3H), 1.69 (s, 6H). **<sup>13</sup>C NMR** (100 MHz, DMSO-*d*<sub>6</sub>): δ 150.48, 149.34, 148.37, 128.78, 128.17, 126.01, 125.51, 121.98, 121.92, 57.55, 30.09. **HRMS** (ESI): calcd for C<sub>17</sub>H<sub>18</sub>D<sub>3</sub>N<sub>2</sub>S [M + H]<sup>+</sup> 288.1614, found 288.1622.

**ethyl (Z)-4-(((tert-butylamino)((methyl-d3)thio)methylene)amino)benzoate**

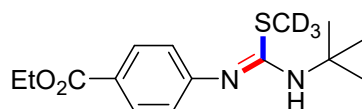

**6a**

Following the general procedure, using (petroleum ether : EtOAc = 9 : 1) as the eluant afforded a

yellow solid (58.9 mg, 66% yield), Mp = 71-72°C. **<sup>1</sup>H NMR** (400 MHz, DMSO-*d*<sub>6</sub>): δ 7.83 (d, *J* = 8.5 Hz, 2H), 6.84 (d, *J* = 8.5 Hz, 2H), 6.14 (s, 1H), 4.28 (q, *J* = 7.1 Hz, 2H), 1.40 (s, 9H), 1.32 (t, *J* = 7.1 Hz, 3H). **<sup>13</sup>C NMR** (100 MHz, DMSO-*d*<sub>6</sub>): δ 166.27, 155.26, 151.19, 130.54, 123.07, 122.32, 60.64, 53.26, 28.83, 14.78. **HRMS** (ESI): calcd for C<sub>15</sub>H<sub>20</sub>D<sub>3</sub>N<sub>2</sub>O<sub>2</sub>S [M + H]<sup>+</sup> 298.1669, found 298.1677.

benzo[d][1,3]dioxol-5-yl

(*Z*)-4-(((tert-butylamino)((methyl-

d3)thio)methylene)amino)benzoate

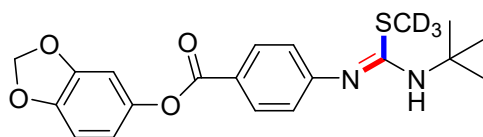

**6b**

Following the general procedure, using (petroleum ether : EtOAc = 9 : 1) as the eluant afforded a yellow solid (80.5 mg, 69% yield), Mp = 103-104°C. **<sup>1</sup>H NMR** (400 MHz, DMSO-*d*<sub>6</sub>): δ 7.97 (d, *J* = 8.5 Hz, 2H), 6.97-6.90 (m, 4H), 6.71 (dd, *J* = 8.4, 2.4 Hz, 1H), 6.25 (s, 1H), 6.09 (s, 2H), 1.41 (s, 9H). **<sup>13</sup>C NMR** (100 MHz, DMSO-*d*<sub>6</sub>): δ 165.25, 155.97, 151.43, 148.10, 145.60, 145.35, 131.26, 122.49, 121.78, 114.76, 108.39, 104.65, 102.16, 53.30, 28.79. **HRMS** (ESI): calcd for C<sub>20</sub>H<sub>20</sub>D<sub>3</sub>N<sub>2</sub>O<sub>4</sub>S [M + H]<sup>+</sup> 390.1567, found 390.1568.

2-methoxyphenyl (*Z*)-4-(((tert-butylamino)((methyl-d3)thio)methylene)amino)benzoate

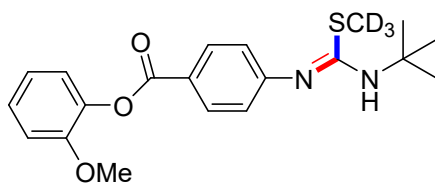

**6c**

Following the general procedure, using (petroleum ether : EtOAc = 9 : 1) as the eluant afforded a yellow solid (68.6 mg, 61% yield), Mp = 131-132°C. **<sup>1</sup>H NMR** (400 MHz, DMSO-*d*<sub>6</sub>): δ 7.97 (d, *J* = 8.2 Hz, 2H), 7.31-6.91 (m, 6H), 6.25 (s, 1H), 3.78 (s, 3H), 1.42 (s, 9H). **<sup>13</sup>C NMR** (100 MHz, DMSO-*d*<sub>6</sub>): δ 164.49, 155.97, 151.60, 151.43, 131.34, 127.38, 123.61, 122.55, 121.61, 121.08, 113.26, 56.17, 53.31, 28.78. **HRMS** (ESI): calcd for C<sub>20</sub>H<sub>22</sub>D<sub>3</sub>N<sub>2</sub>O<sub>3</sub>S [M + H]<sup>+</sup> 376.1774, found

376.1783.

**(3aR,5R,6S,6aR)-5-((R)-2,2-dimethyl-1,3-dioxolan-4-yl)-2,2-dimethyltetrahydrofuro[2,3-d][1,3]dioxol-6-yl 4-(((Z)-(tert-butylamino)((methyl-d3)thio)methylene)amino)benzoate**

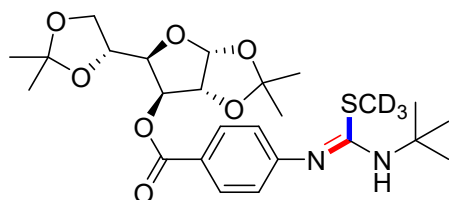

**6d**

Following the general procedure, using (petroleum ether : EtOAc = 9 : 1) as the eluant afforded a yellow liquid (98.1 mg, 64% yield). **<sup>1</sup>H NMR** (400 MHz, DMSO-*d*<sub>6</sub>): δ 7.84 (d, *J* = 8.1 Hz, 2H), 6.87 (d, *J* = 8.2 Hz, 2H), 6.21 (s, 1H), 5.99 (d, *J* = 3.7 Hz, 1H), 5.25 (d, *J* = 3.0 Hz, 1H), 4.68 (d, *J* = 3.7 Hz, 1H), 4.38 (q, *J* = 6.1 Hz, 1H), 4.25 (dd, *J* = 7.3, 3.0 Hz, 1H), 4.07 (q, *J* = 7.4 Hz, 1H), 3.96 (dd, *J* = 8.4, 5.2 Hz, 1H), 1.48 (s, 3H), 1.40 (s, 9H), 1.35 (s, 3H), 1.28 (s, 3H), 1.23 (s, 3H).

**<sup>13</sup>C NMR** (100 MHz, DMSO-*d*<sub>6</sub>): δ 165.20, 155.84, 151.35, 130.82, 122.45, 121.99, 111.79, 108.95, 105.20, 83.28, 79.60, 76.34, 72.61, 66.72, 53.27, 28.77, 27.10, 26.92, 26.44, 25.55.

**HRMS** (ESI): calcd for C<sub>25</sub>H<sub>34</sub>D<sub>3</sub>N<sub>2</sub>O<sub>7</sub>S [M + H]<sup>+</sup> 512.2510, found 512.2510.

**4-chloro-3,5-dimethylphenyl**

**(Z)-4-(((tert-butylamino)((methyl-**

**d3)thio)methylene)amino)benzoate**

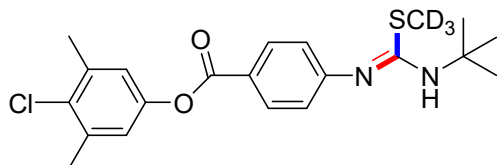

**6e**

Following the general procedure, using (petroleum ether : EtOAc = 9 : 1) as the eluant afforded a yellow solid (73.3 mg, 60% yield), Mp = 121-122 °C. **<sup>1</sup>H NMR** (400 MHz, DMSO-*d*<sub>6</sub>): δ 7.97 (d, *J* = 8.5 Hz, 2H), 7.15 (s, 2H), 6.92 (d, *J* = 8.0 Hz, 2H), 6.27 (s, 1H), 2.37 (s, 6H), 1.41 (s, 9H). **<sup>13</sup>C NMR** (100 MHz, DMSO-*d*<sub>6</sub>): δ 164.95, 156.08, 151.48, 149.18, 137.37, 131.31, 130.93, 122.57, 121.51, 53.31, 28.77, 20.72. **HRMS** (ESI): calcd for C<sub>21</sub>H<sub>23</sub>D<sub>3</sub>N<sub>2</sub>O<sub>2</sub>SCl [M + H]<sup>+</sup> 408.1592, found 408.1598.

## **$^1\text{H}$ , $^{13}\text{C}$ and $^{19}\text{F}$ NMR spectra of products**

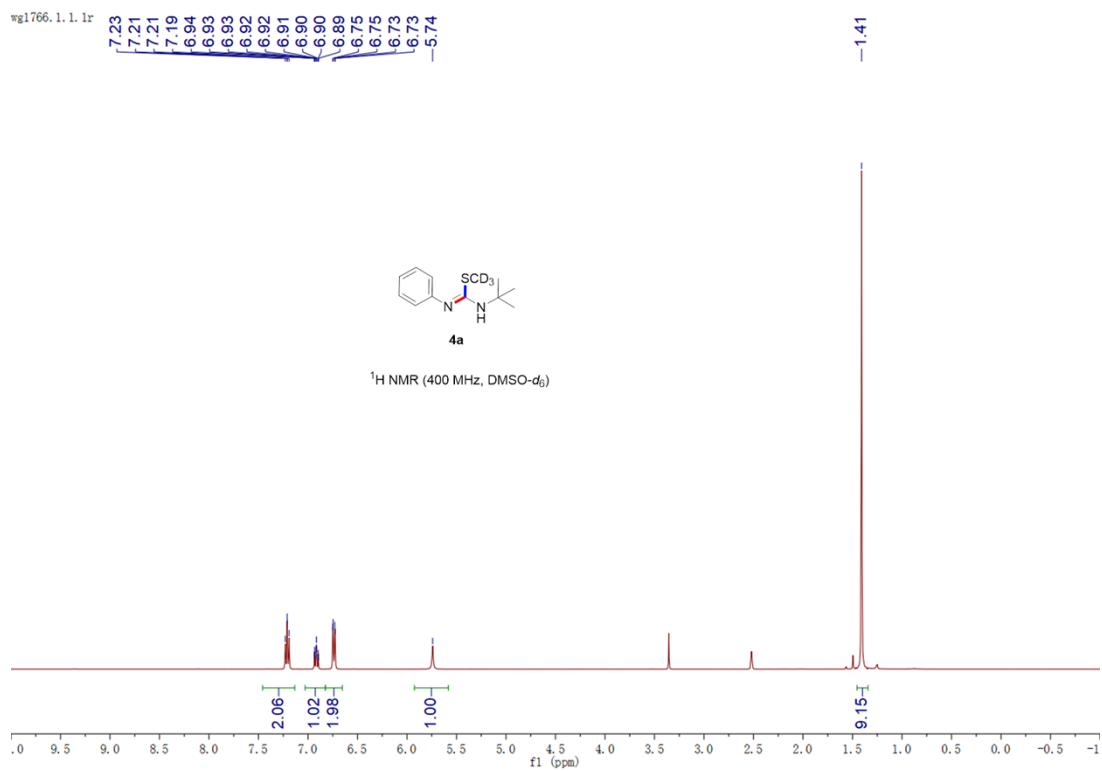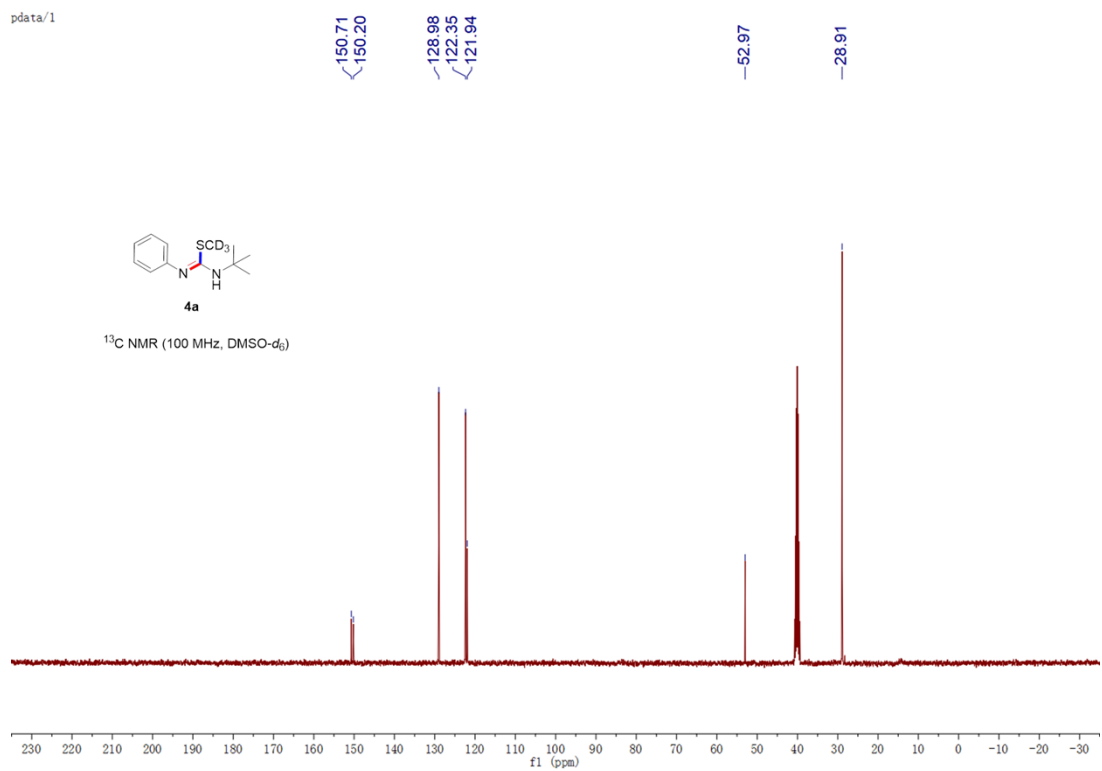

wg1729.1.1.1r

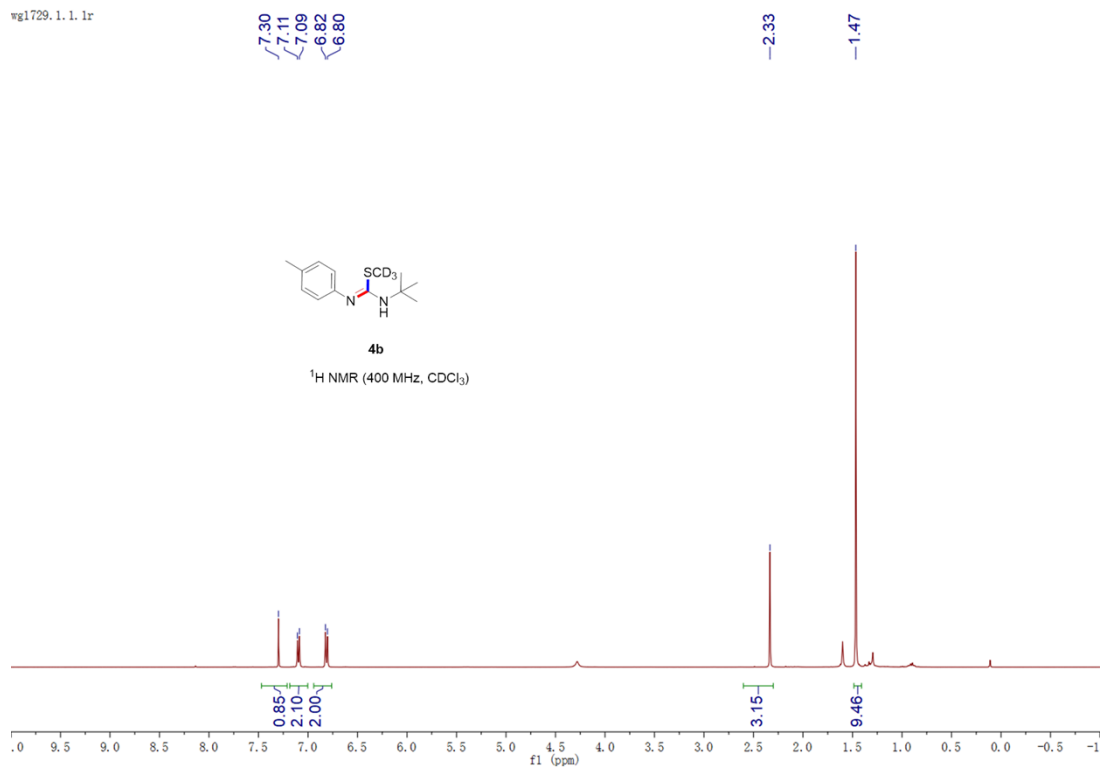

pdata/1

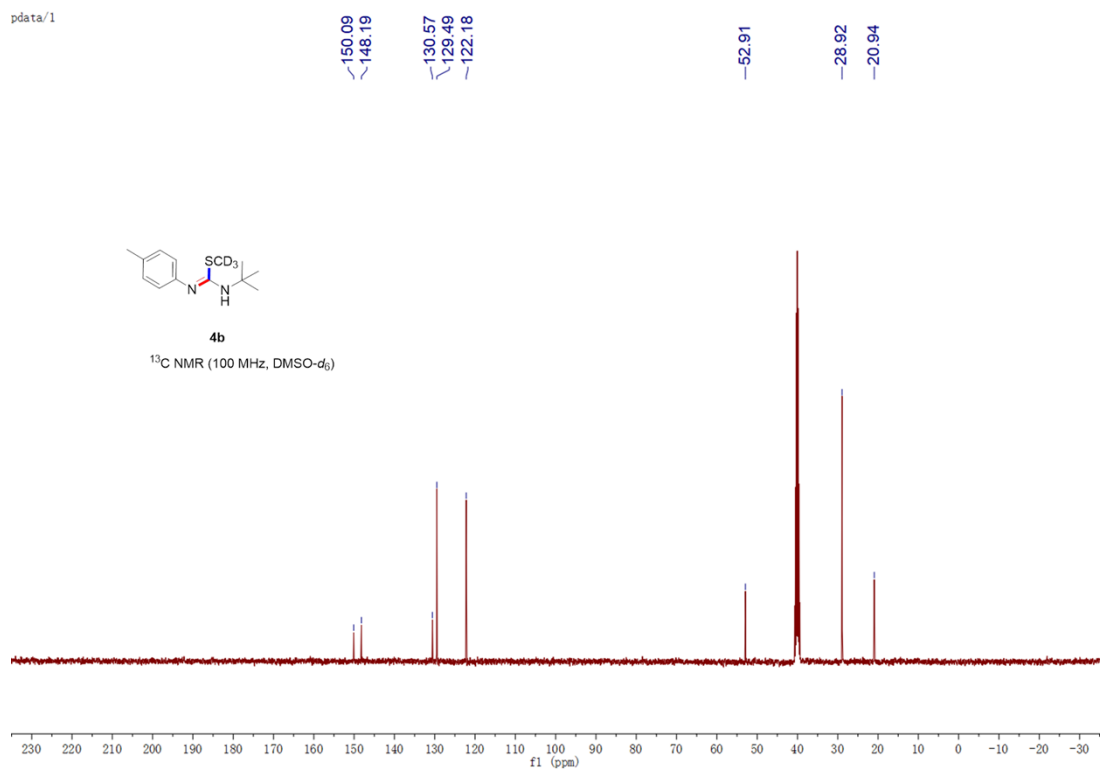

wg1744.1.1.1r

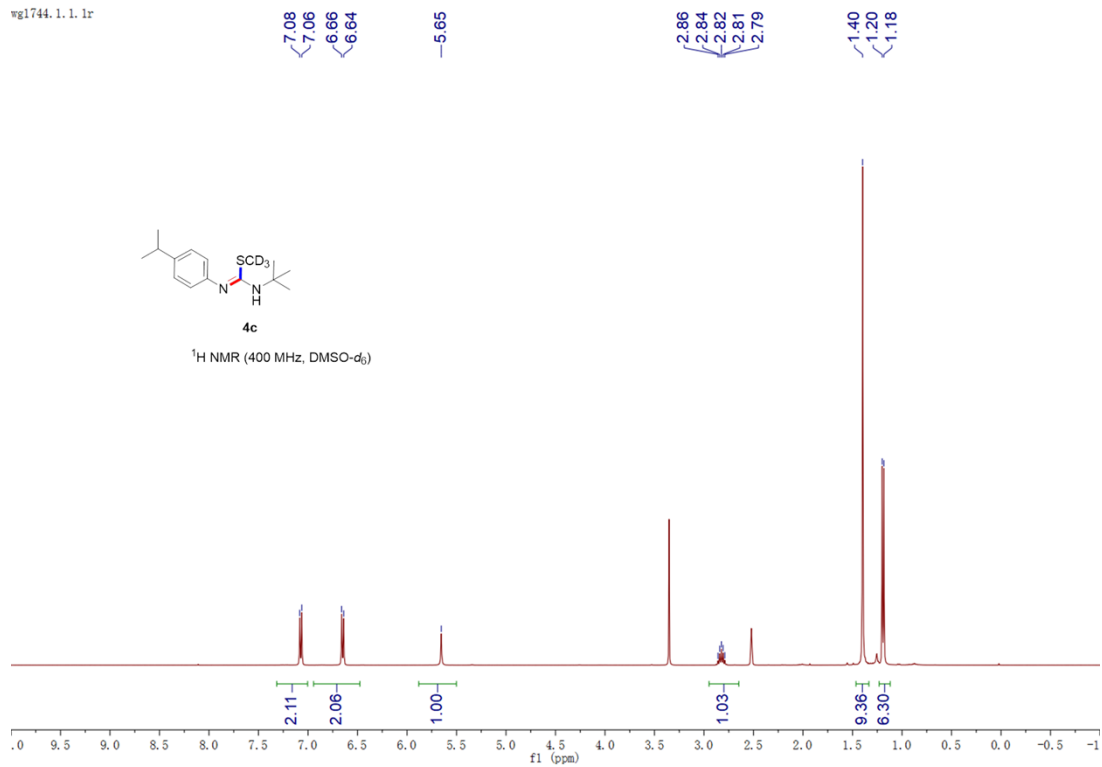

pdata/1

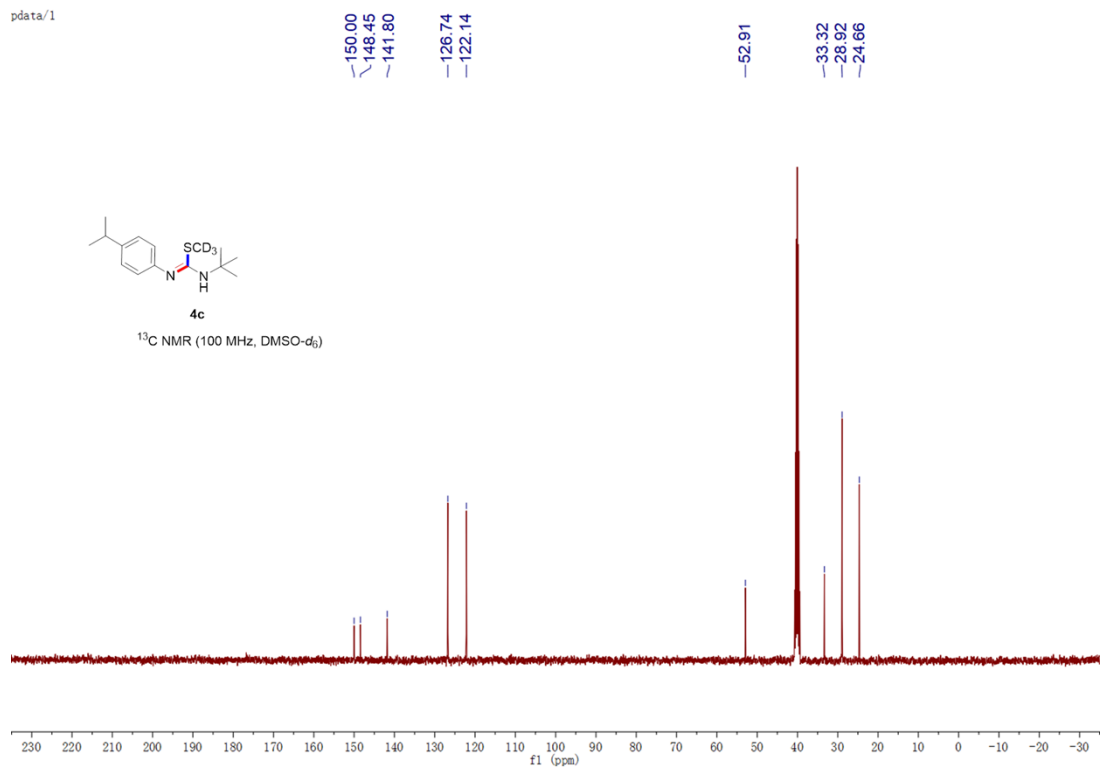

wg1735.1.1.1r

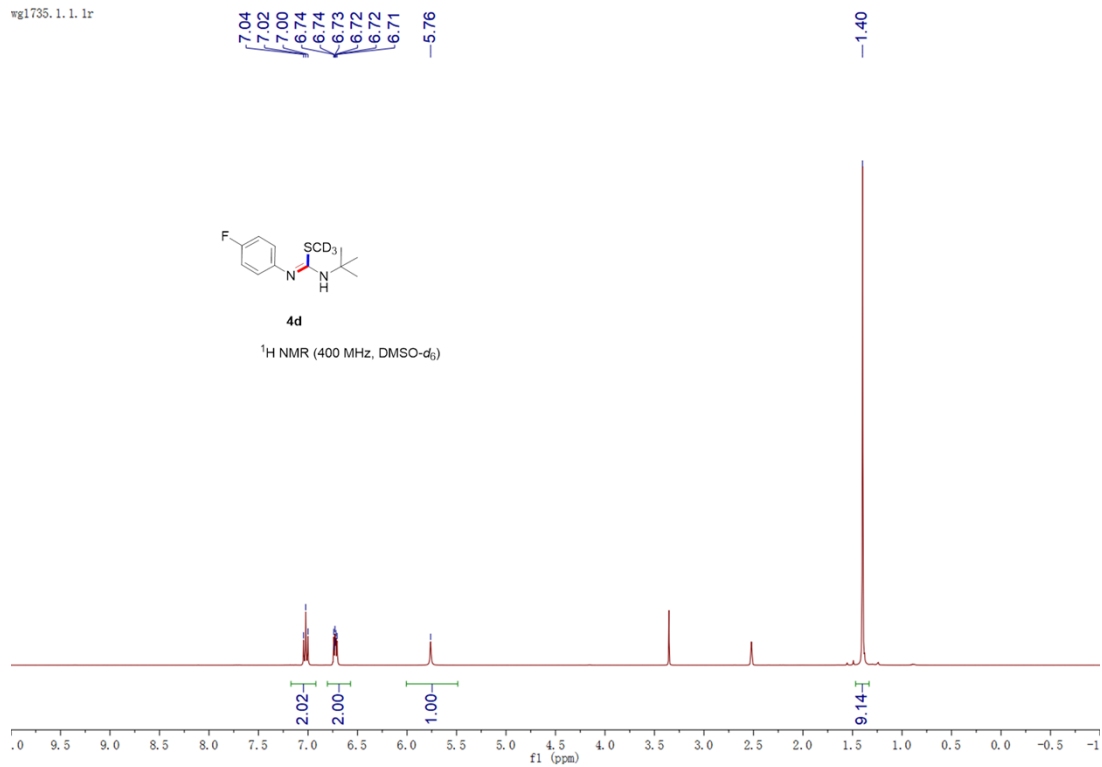

pdata/1

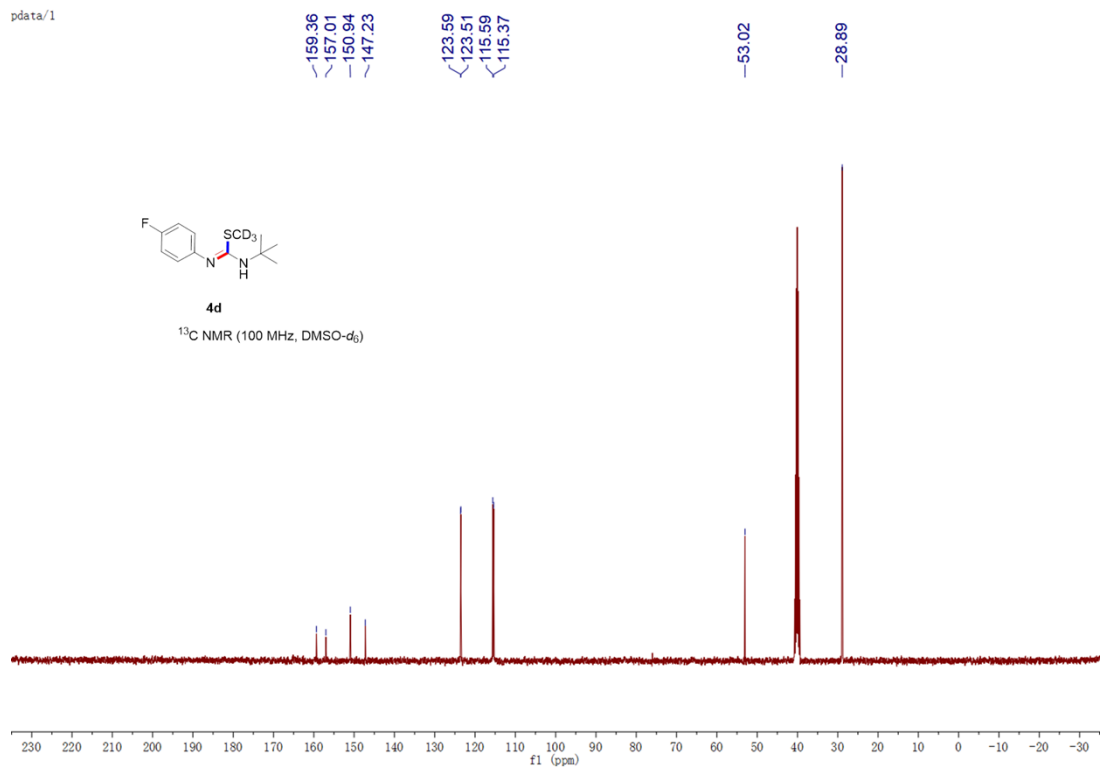

pdata/1

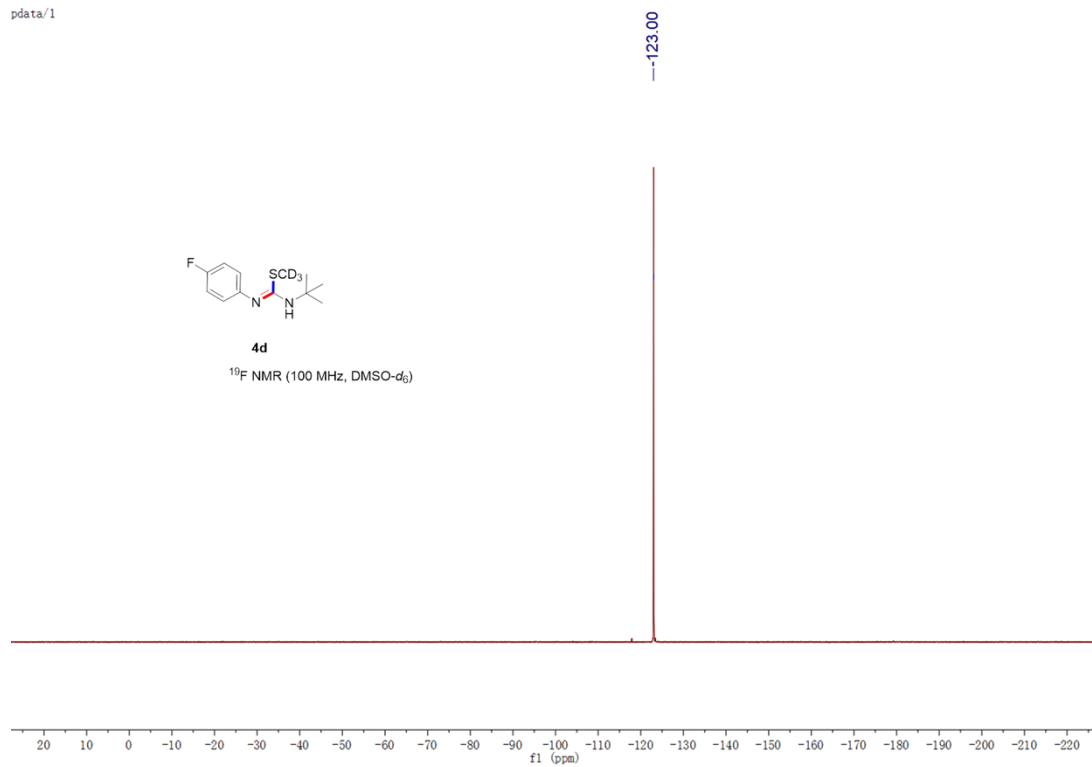

pdata/1

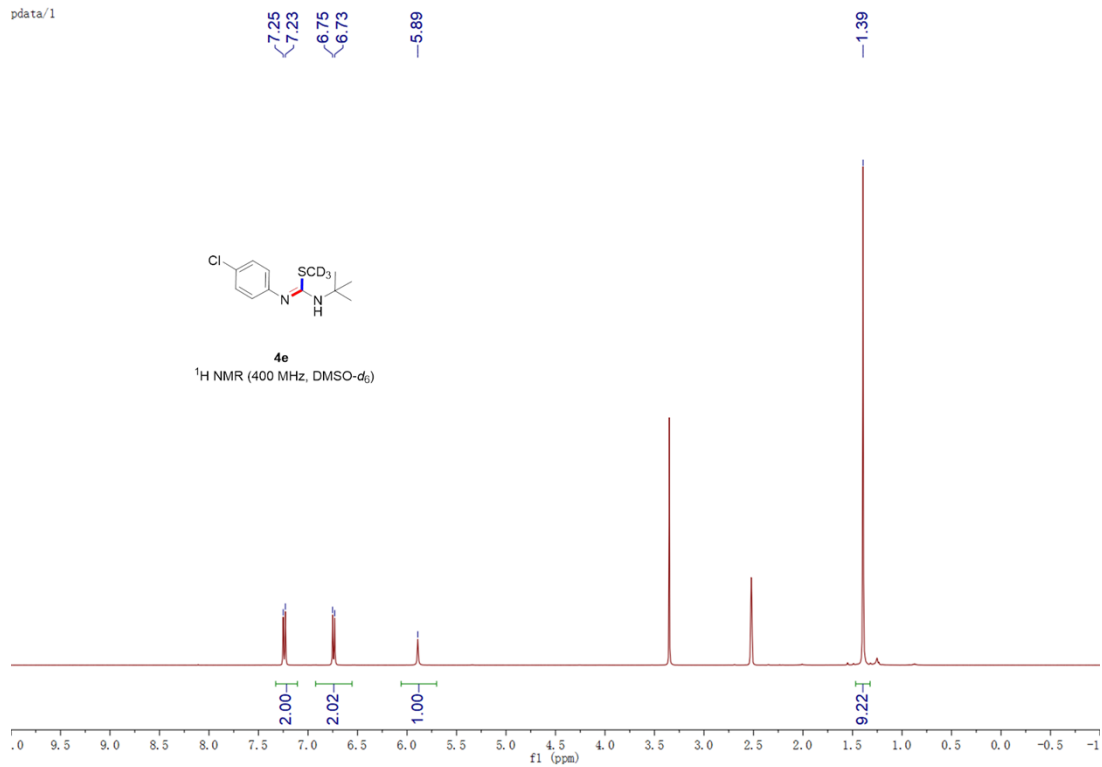

wg1728.1.1.1r

151.07  
149.70

128.87  
125.86  
124.08

53.10

28.86

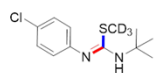

**4e**

$^{13}\text{C}$  NMR (100 MHz,  $\text{DMSO}-d_6$ )

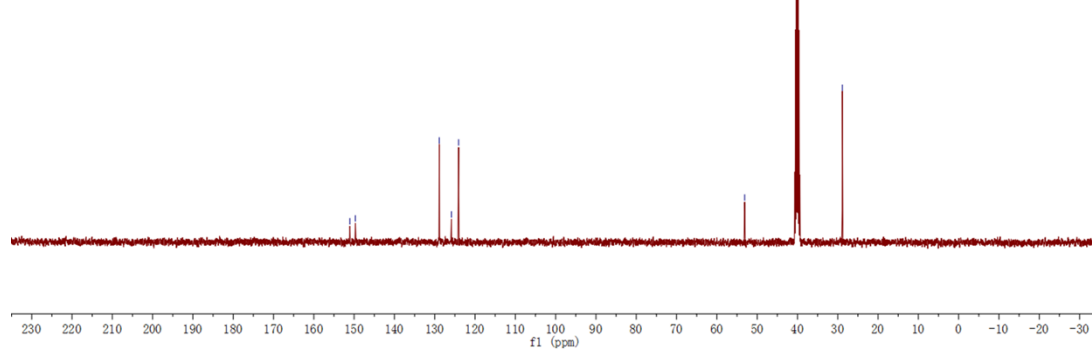

pdata/1

7.37  
7.35

6.70  
6.68

5.90

1.39

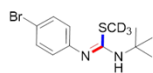

**4f**

$^1\text{H}$  NMR (400 MHz,  $\text{DMSO}-d_6$ )

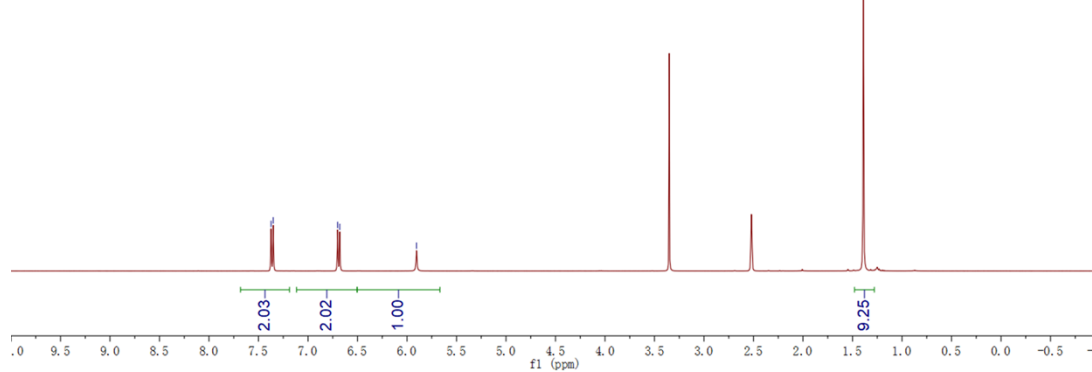

wg1722.1.1.1r

151.01  
150.10

131.77  
124.60

113.84

53.12

28.86

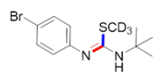

4f

<sup>13</sup>C NMR (100 MHz, DMSO-d<sub>6</sub>)

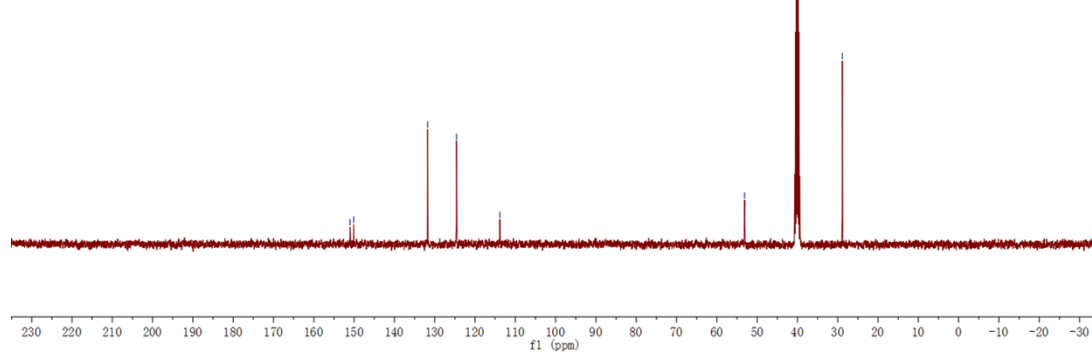

wg1737.1.1.1r

7.24  
7.22

6.68  
6.66

5.67

1.41  
1.28

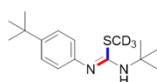

4g

<sup>1</sup>H NMR (400 MHz, DMSO-d<sub>6</sub>)

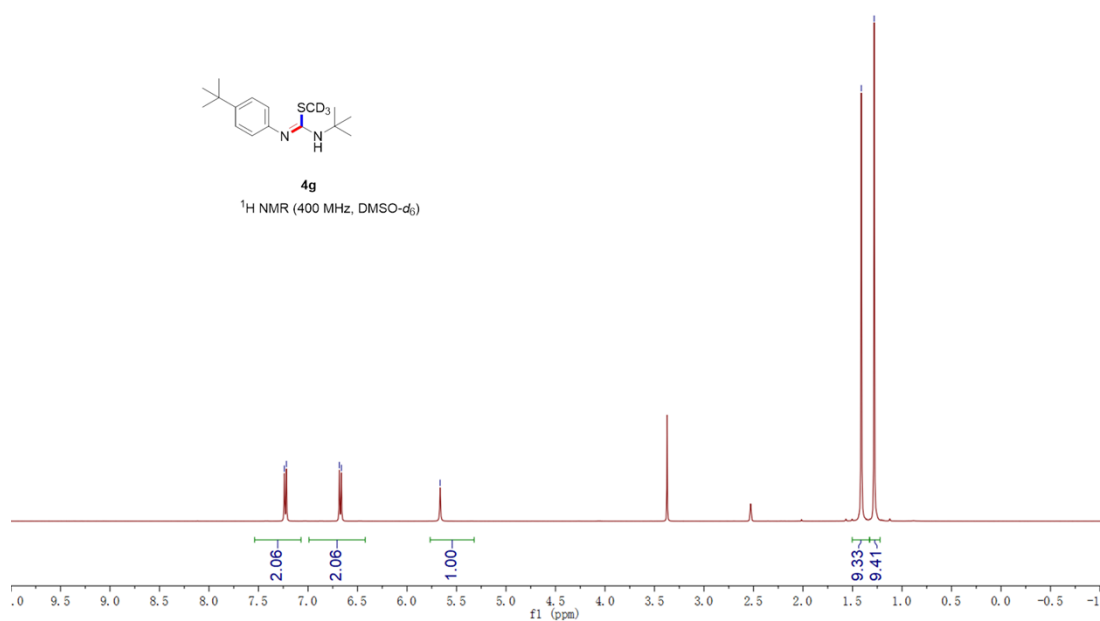

wg1737.2.1.1r

149.97  
148.06  
144.02

125.59  
121.85

52.91

34.34  
31.90  
28.92

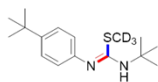

**4g**

<sup>13</sup>C NMR (100 MHz, DMSO-*d*<sub>6</sub>)

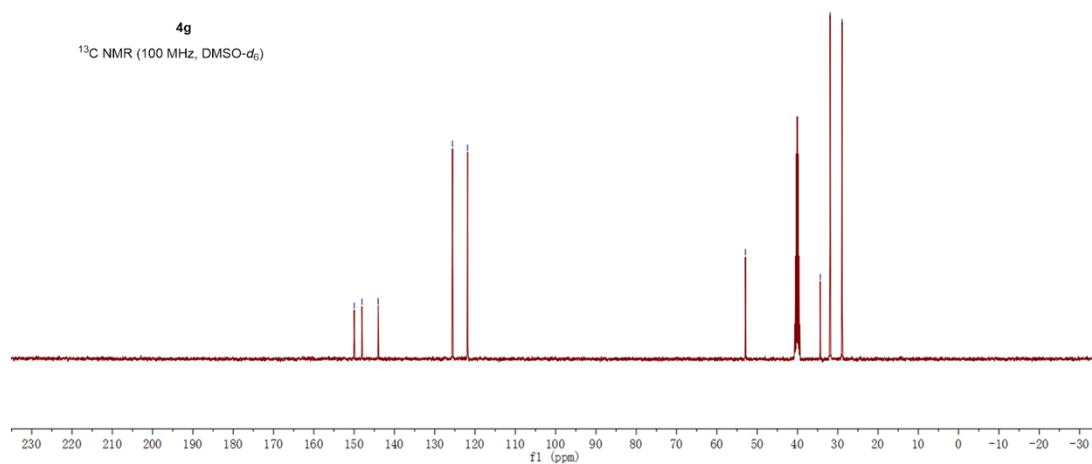

wg1731.1.1.1r

6.80  
6.78  
6.66  
6.64

5.59

3.71

1.39

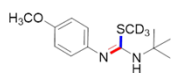

**4h**

<sup>1</sup>H NMR (400 MHz, DMSO-*d*<sub>6</sub>)

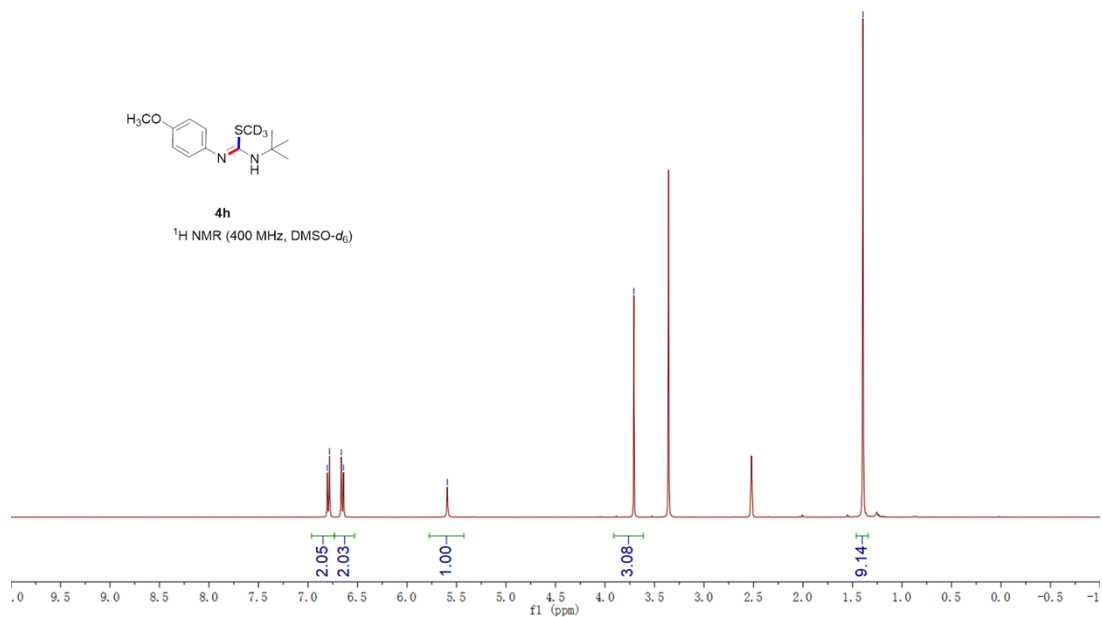

pdata/1

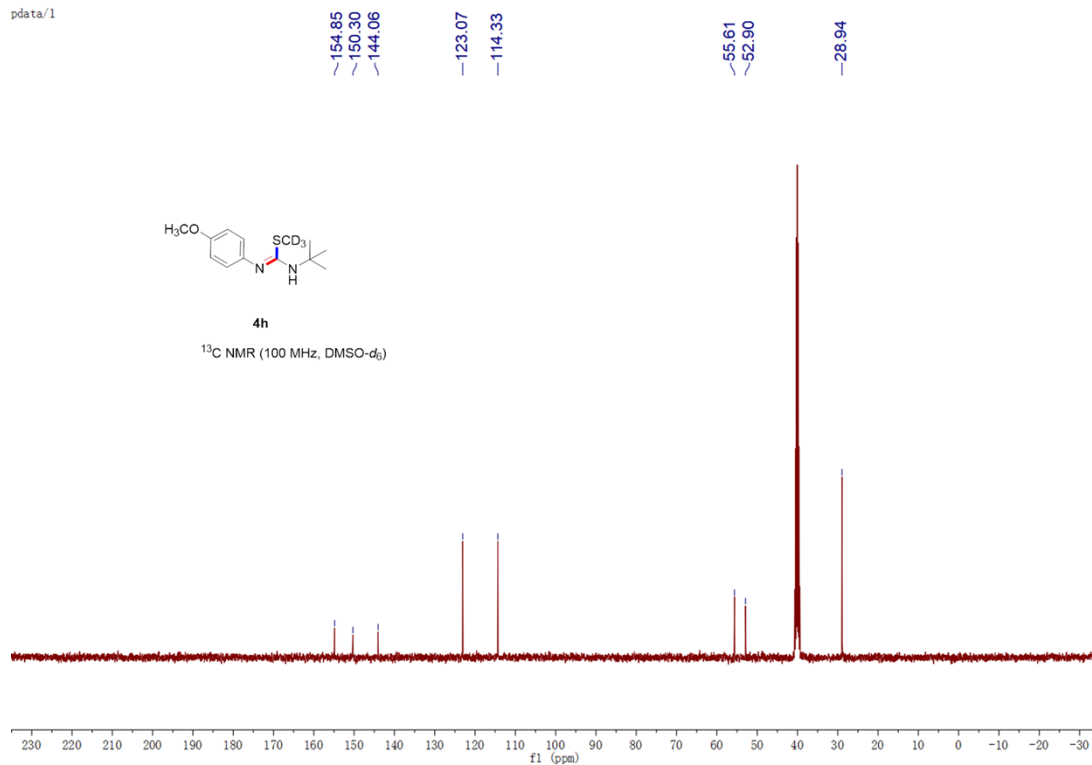

wg1734.1.1.1r

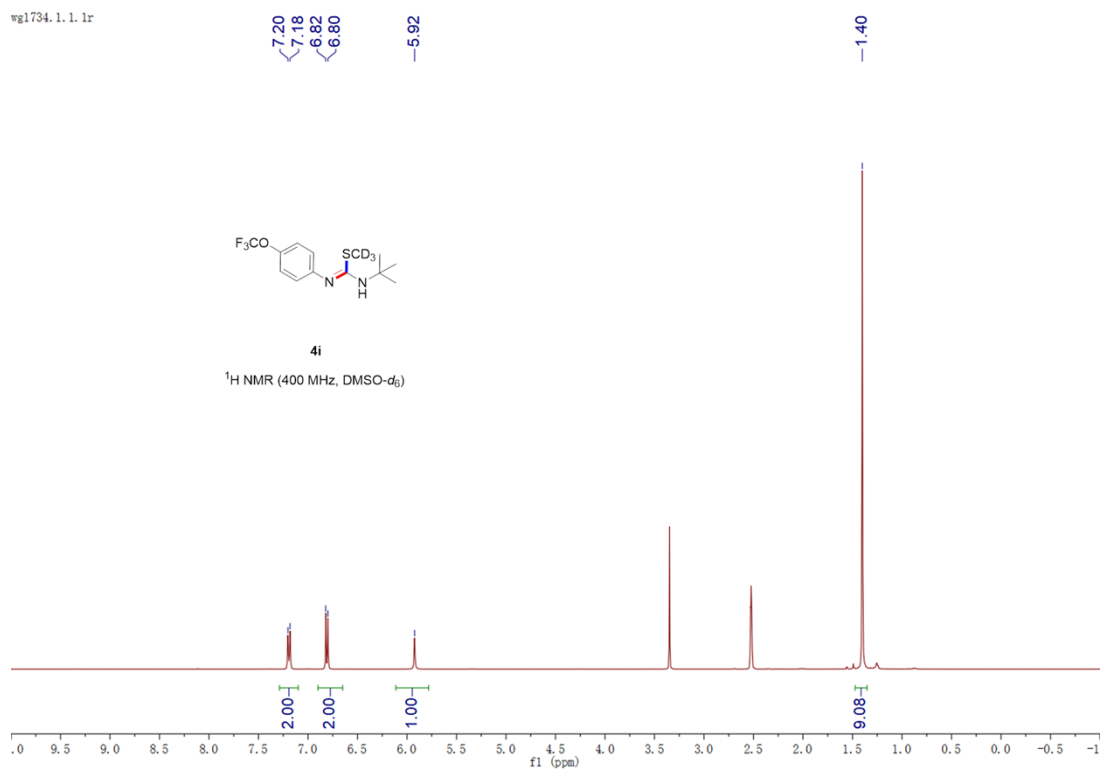

pdata/1

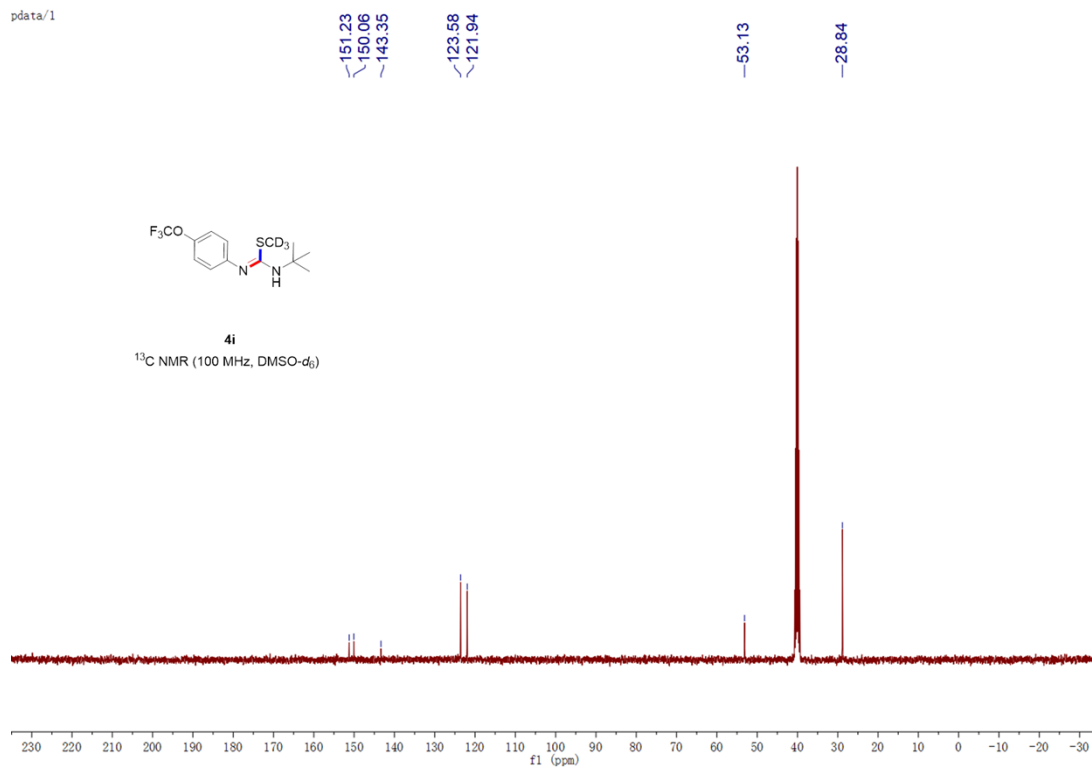

pdata/1

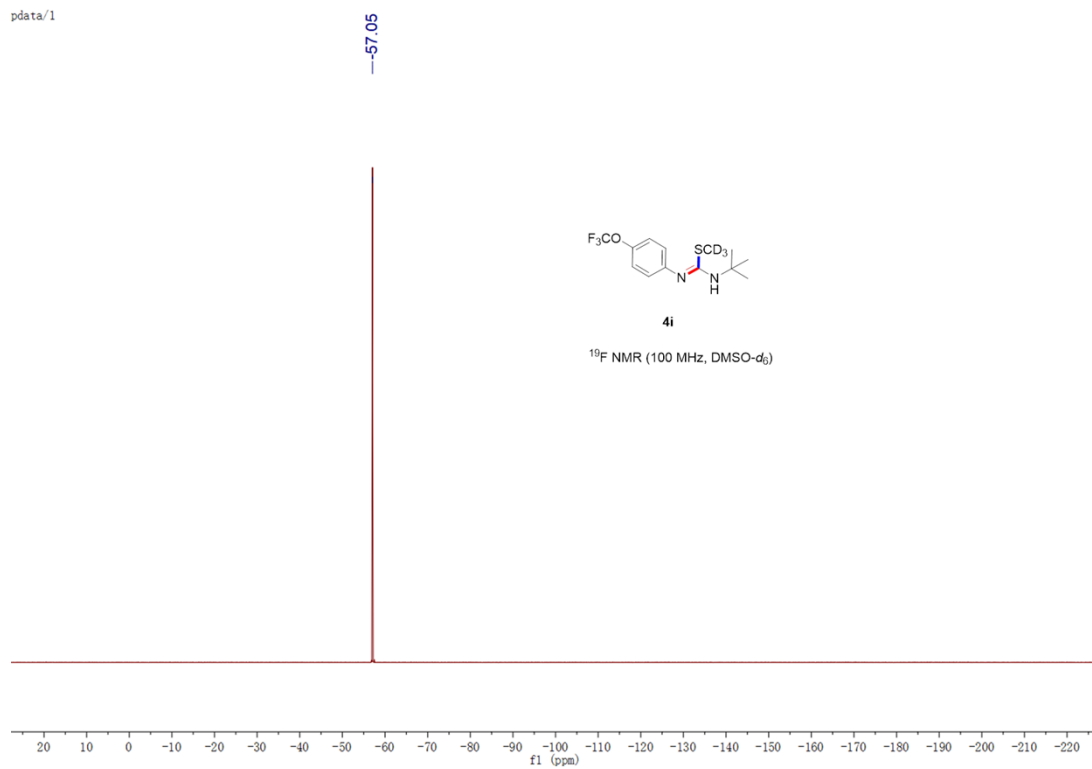

wg1793.1.1.1r

7.54  
7.52

6.89  
6.86

6.13

1.40

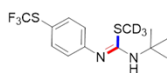

4j

<sup>1</sup>H NMR (400 MHz, DMSO-d<sub>6</sub>)

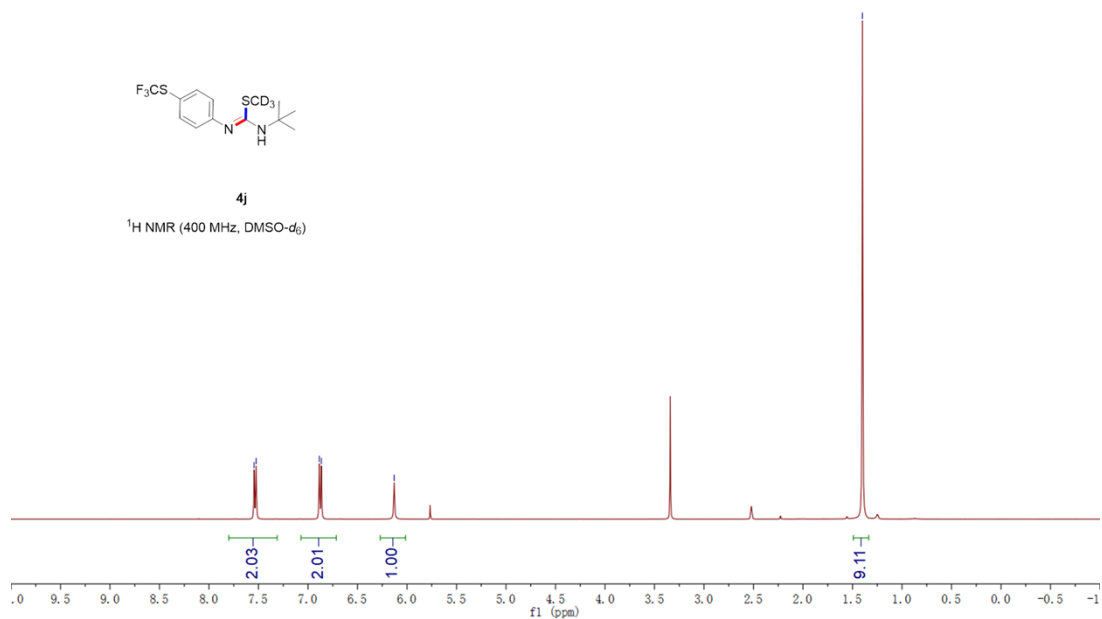

wg1793.2.1.1r

153.80  
151.41

137.63  
131.75

128.69  
123.81

114.17

53.27

28.82

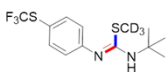

4j

<sup>13</sup>C NMR (100 MHz, DMSO-d<sub>6</sub>)

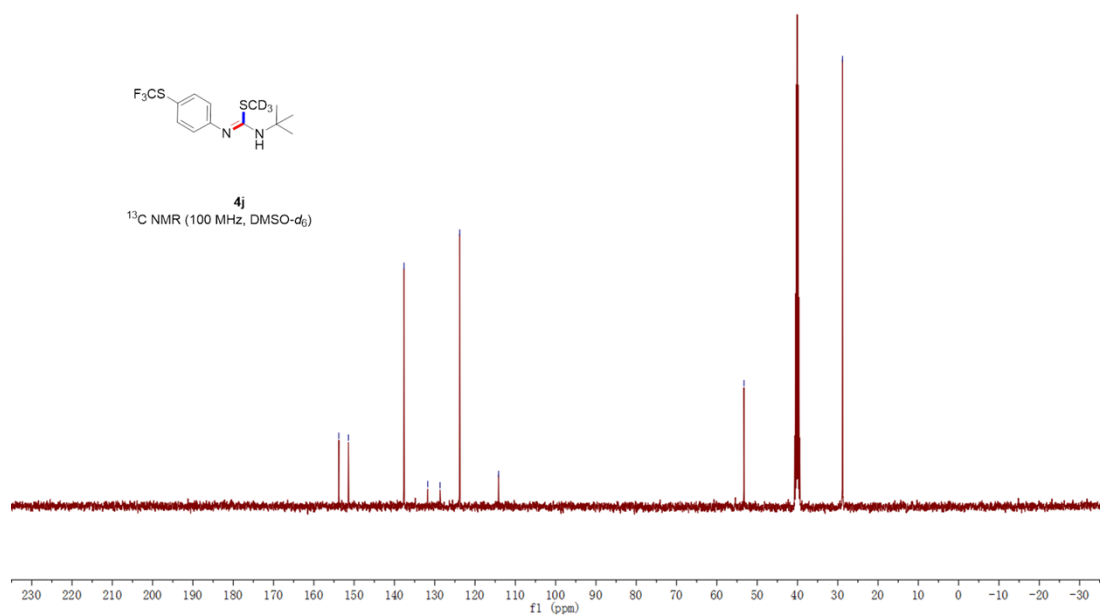

pdata/1

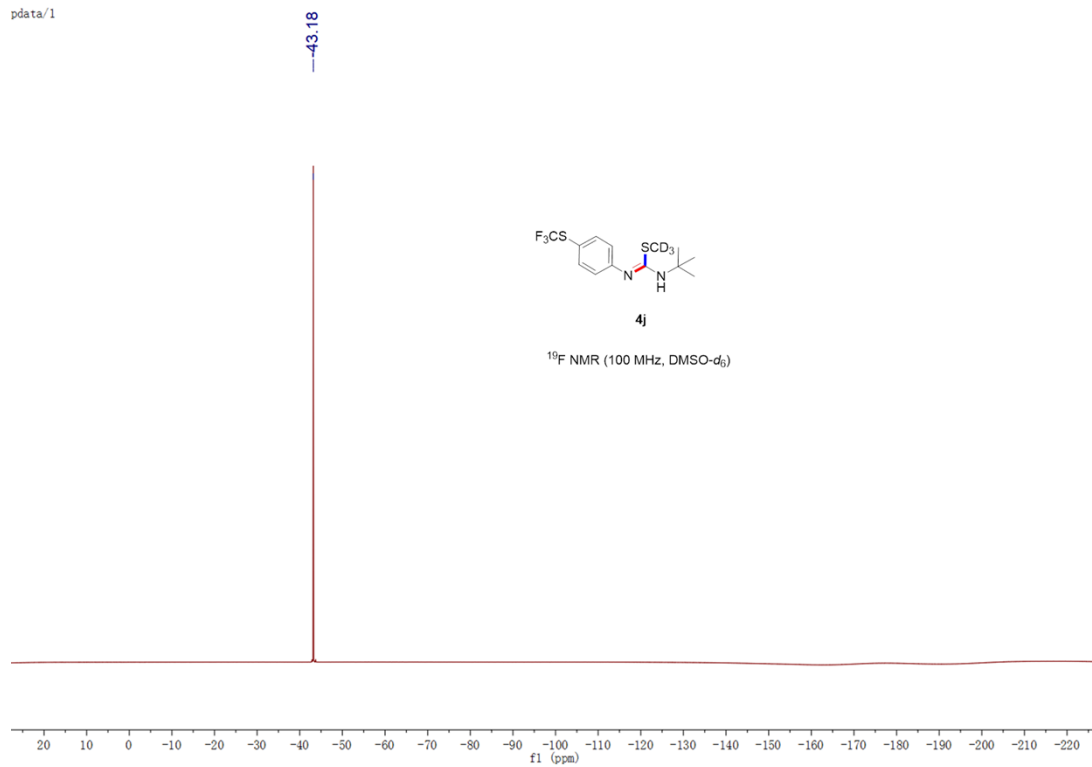

pdata/1

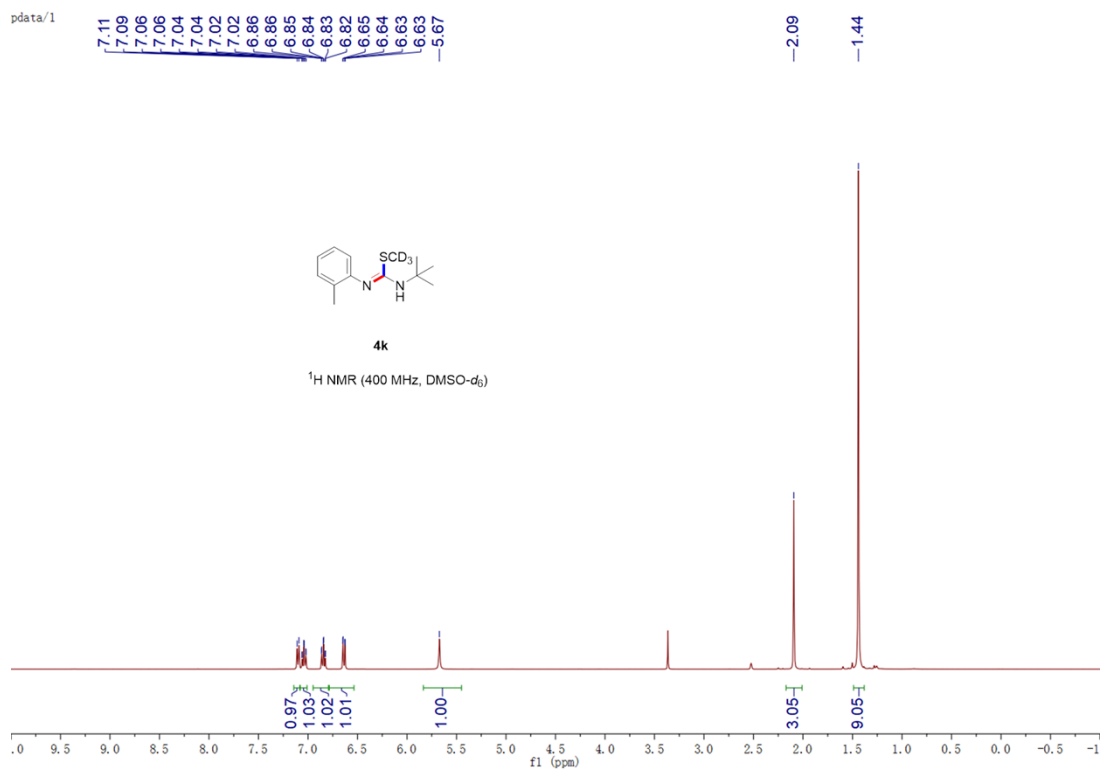

pdata/1

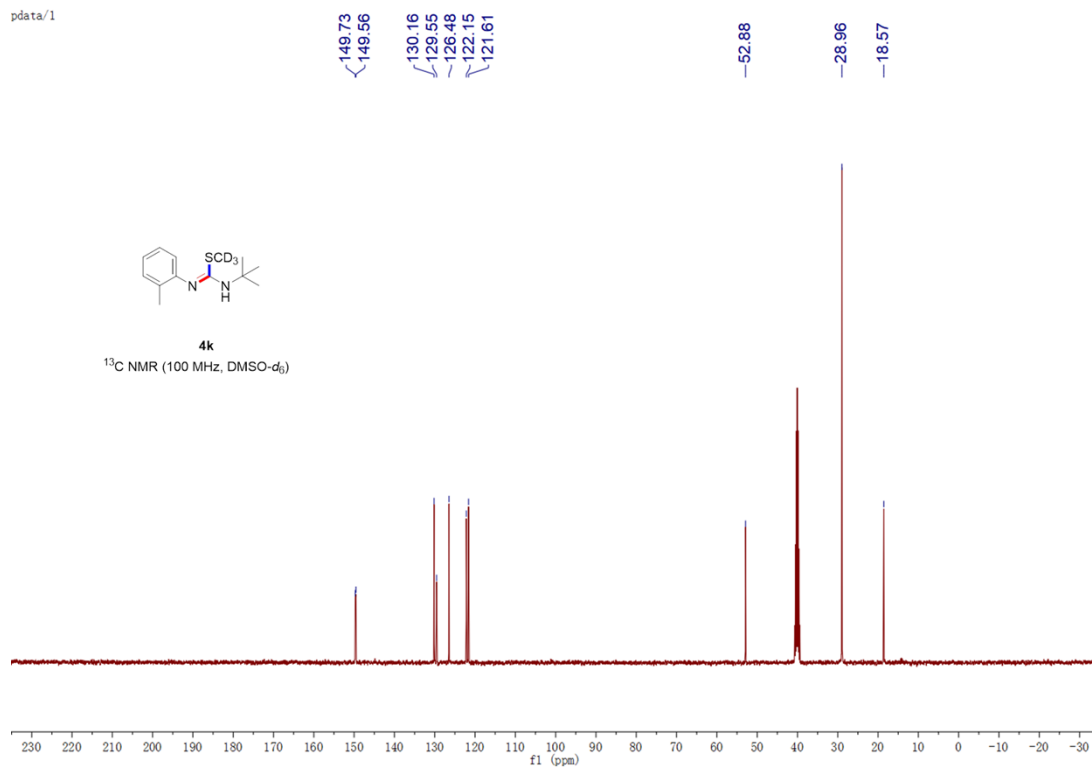

wg1769.1.1.1r

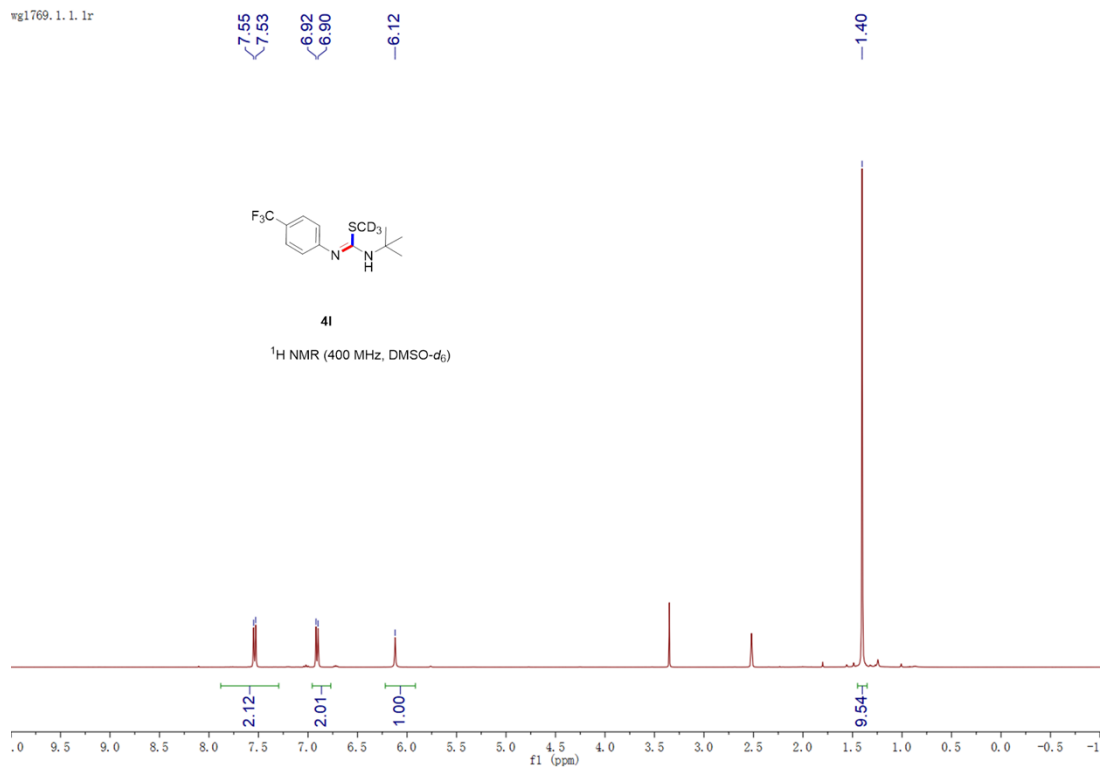

pdata/1

154.37  
151.48  
126.74  
126.21  
126.17  
126.14  
124.05  
122.79  
122.28  
121.96  
121.65

53.26

28.81

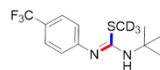

4l

<sup>13</sup>C NMR (100 MHz, DMSO-d<sub>6</sub>)

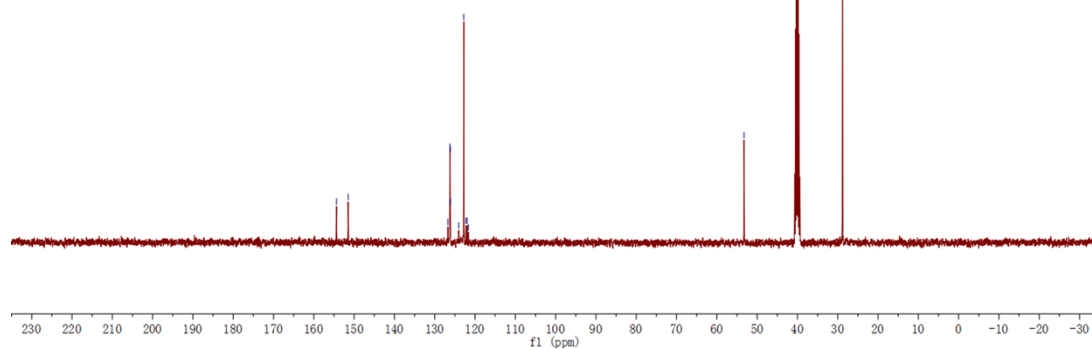

pdata/1

59.85

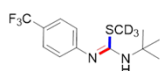

4l

<sup>19</sup>F NMR (100 MHz, DMSO-d<sub>6</sub>)

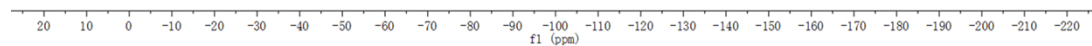

wg1800.1.1.1r

6.83  
6.81  
6.65  
6.63

5.56

3.75  
3.74  
3.73

3.02  
3.01  
3.00

1.39

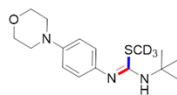

**4m**

<sup>1</sup>H NMR (400 MHz, DMSO-d<sub>6</sub>)

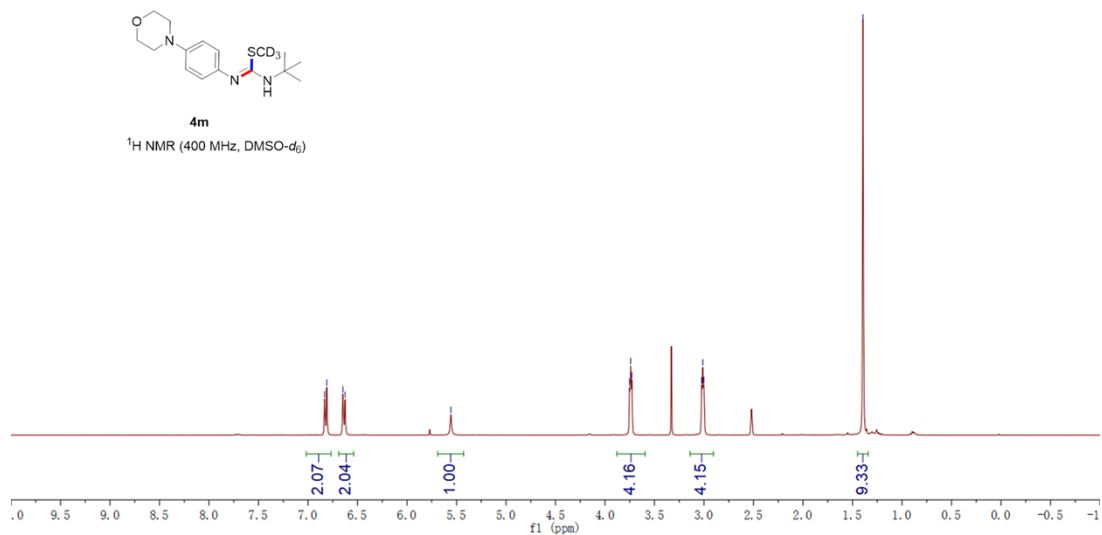

pdata/1

149.97  
146.89  
143.40

122.76  
116.46

66.74

52.88  
50.03

28.96

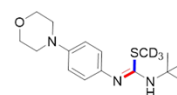

**4m**

<sup>13</sup>C NMR (100 MHz, DMSO-d<sub>6</sub>)

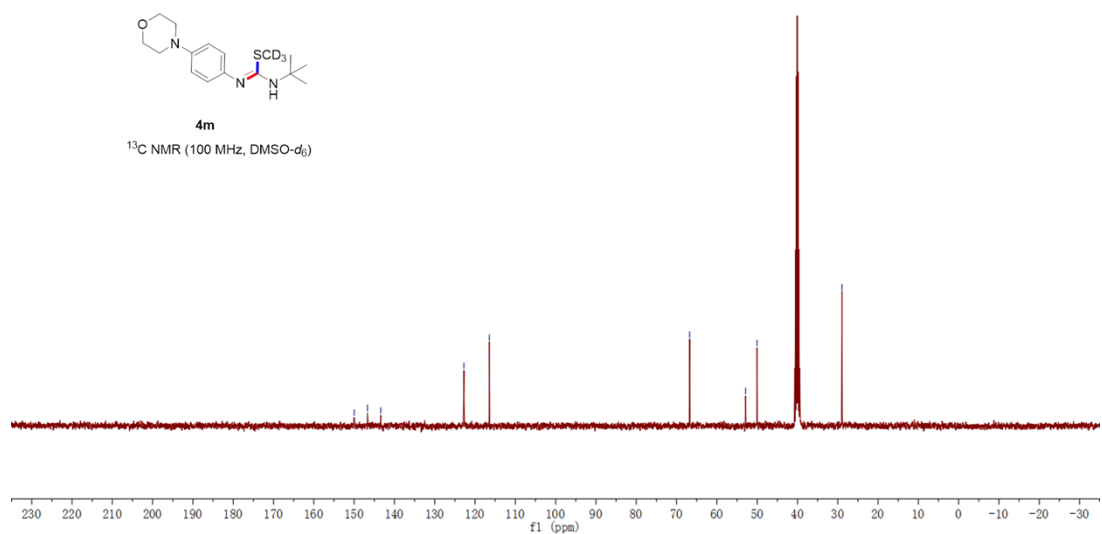

wg1804.1.1.1r

6.02  
5.64  
3.73  
3.62  
1.41

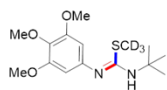

4n

$^1\text{H}$  NMR (400 MHz, DMSO- $d_6$ )

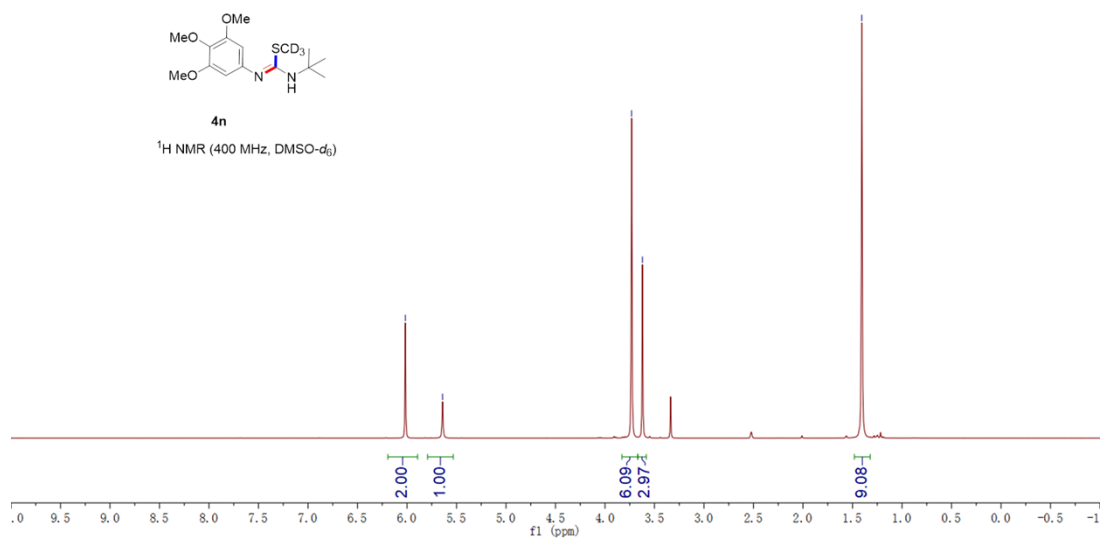

wg1804.2.1.1r

153.30  
150.46  
146.86  
133.09  
99.74  
60.58  
56.15  
52.97  
28.95

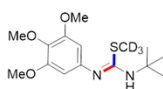

4n

$^{13}\text{C}$  NMR (100 MHz, DMSO- $d_6$ )

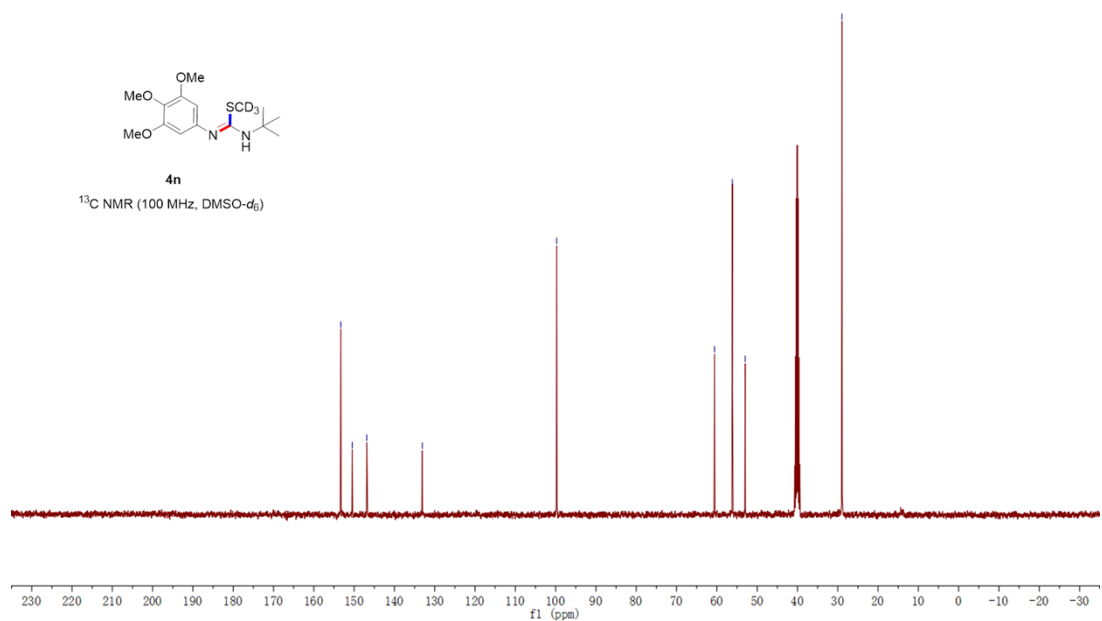

wg1780.1.1.1r

7.64  
7.62  
6.90  
6.88  
6.31

1.39

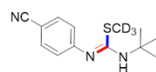

4o

<sup>1</sup>H NMR (400 MHz, DMSO-d<sub>6</sub>)

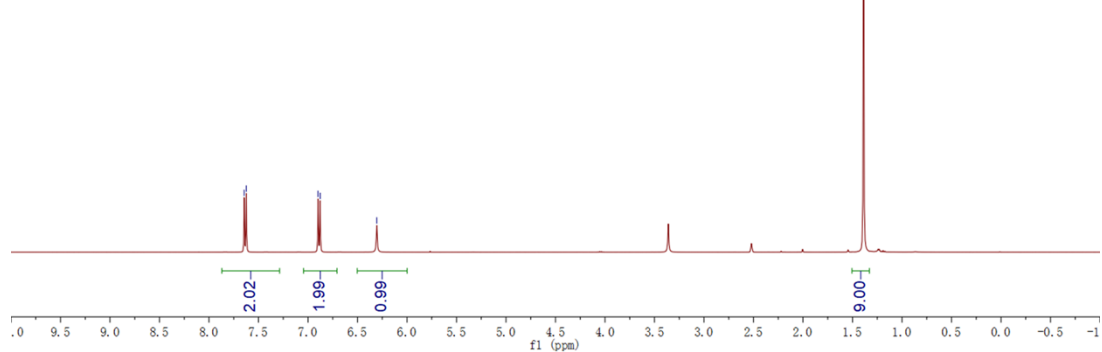

pdata/1

155.00  
151.88

133.38

123.24  
120.25

103.43

53.40

28.79

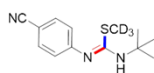

4o

<sup>13</sup>C NMR (100 MHz, DMSO-d<sub>6</sub>)

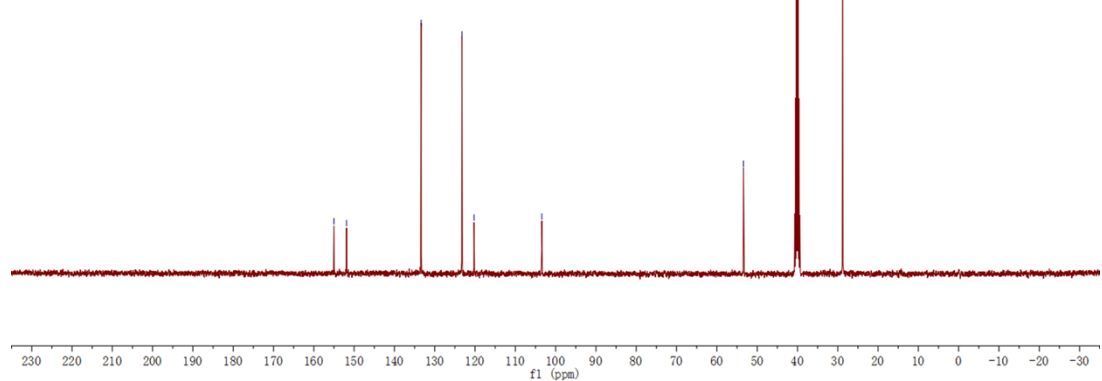

wg1778.1.1.1r

6.74

5.46

2.18  
2.01

1.47

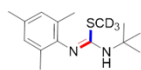

4p

<sup>1</sup>H NMR (400 MHz, DMSO-d<sub>6</sub>)

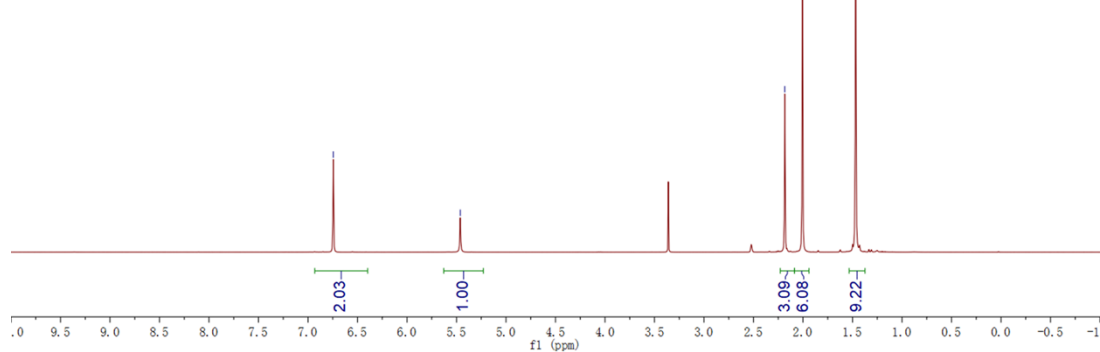

pdata/1

149.65  
146.01

130.21  
128.51

52.77

28.93  
20.91  
18.51

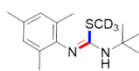

4p

<sup>13</sup>C NMR (100 MHz, DMSO-d<sub>6</sub>)

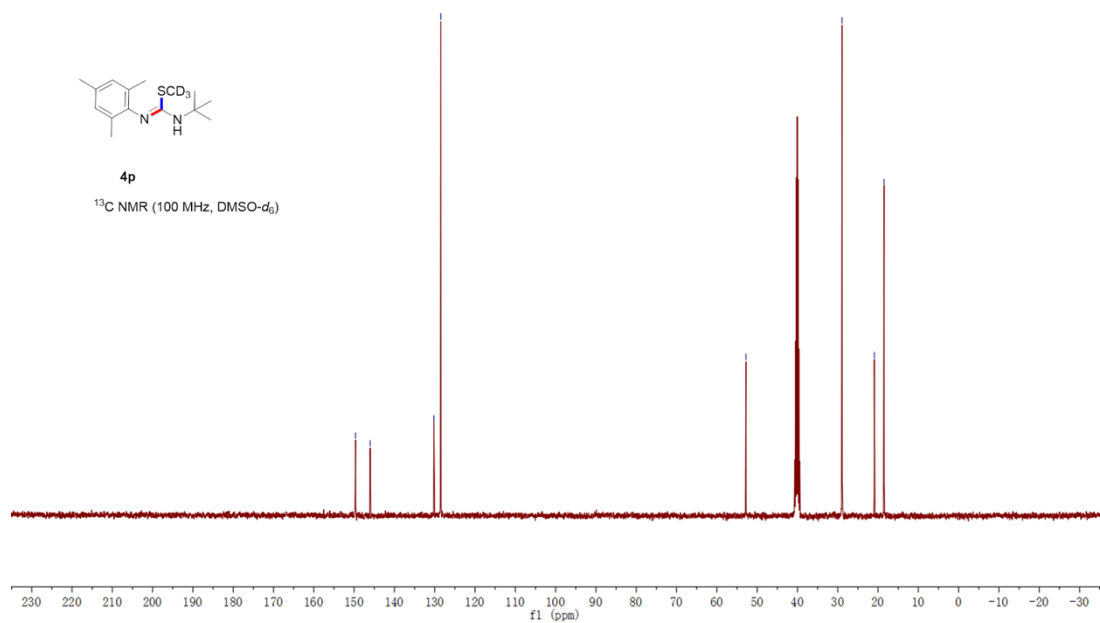

wg1743.1.1.1r

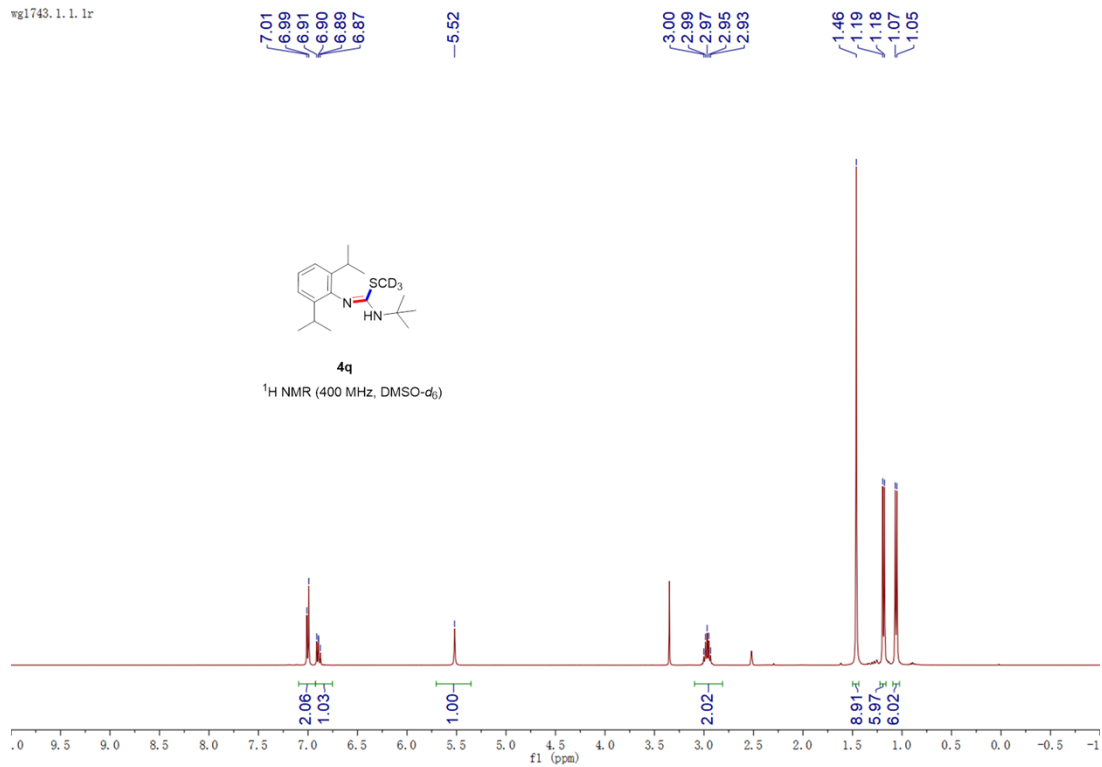

pdata/1

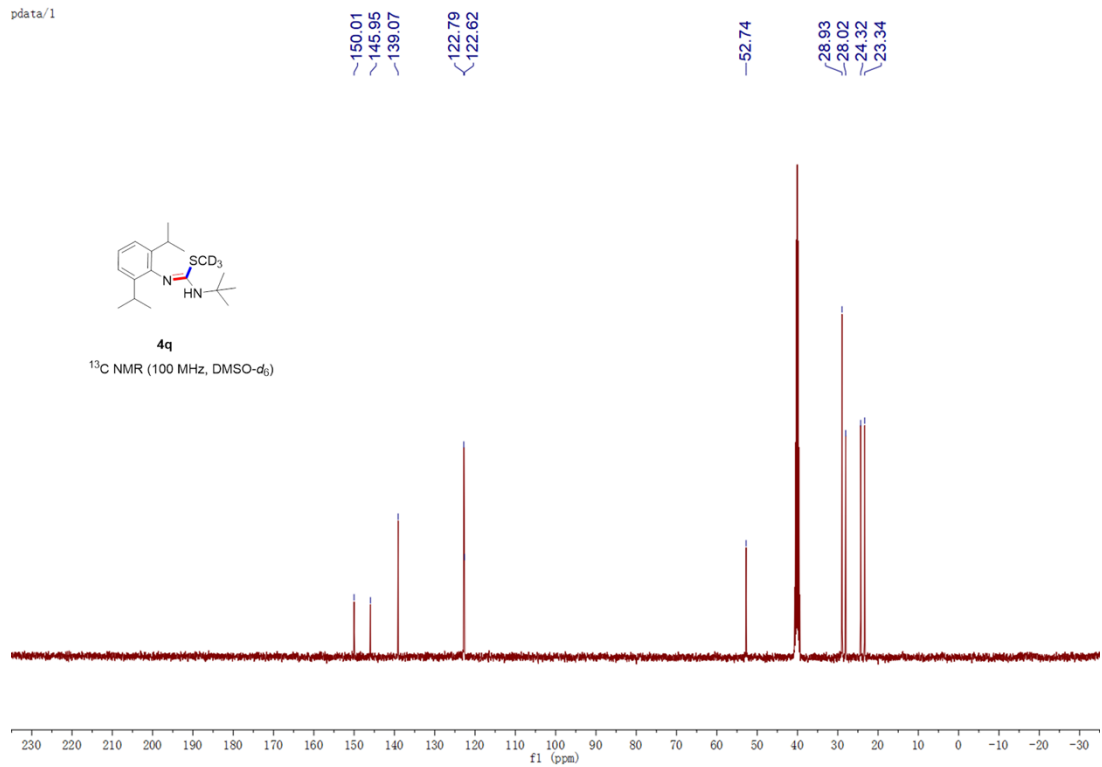

wg1796.1.1.1r

7.54  
7.52

6.75  
6.73

5.89

1.39  
1.29

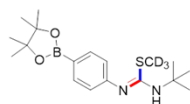

4r

<sup>1</sup>H NMR (400 MHz, DMSO-d<sub>6</sub>)

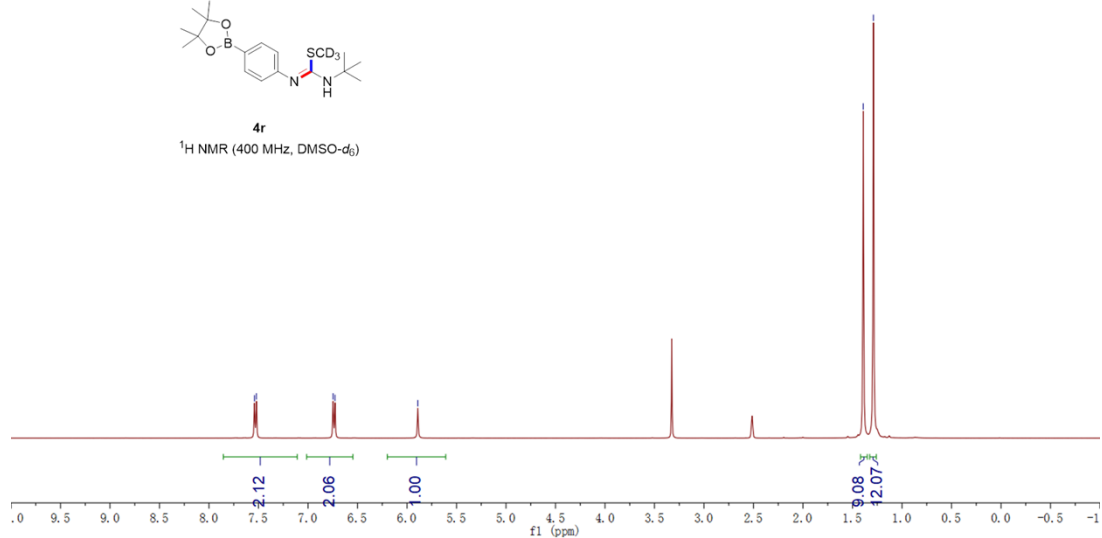

wg1796.2.1.1r

153.65  
150.39

135.65

121.87

83.72

53.08

28.87  
25.22

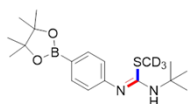

4r

<sup>13</sup>C NMR (100 MHz, DMSO-d<sub>6</sub>)

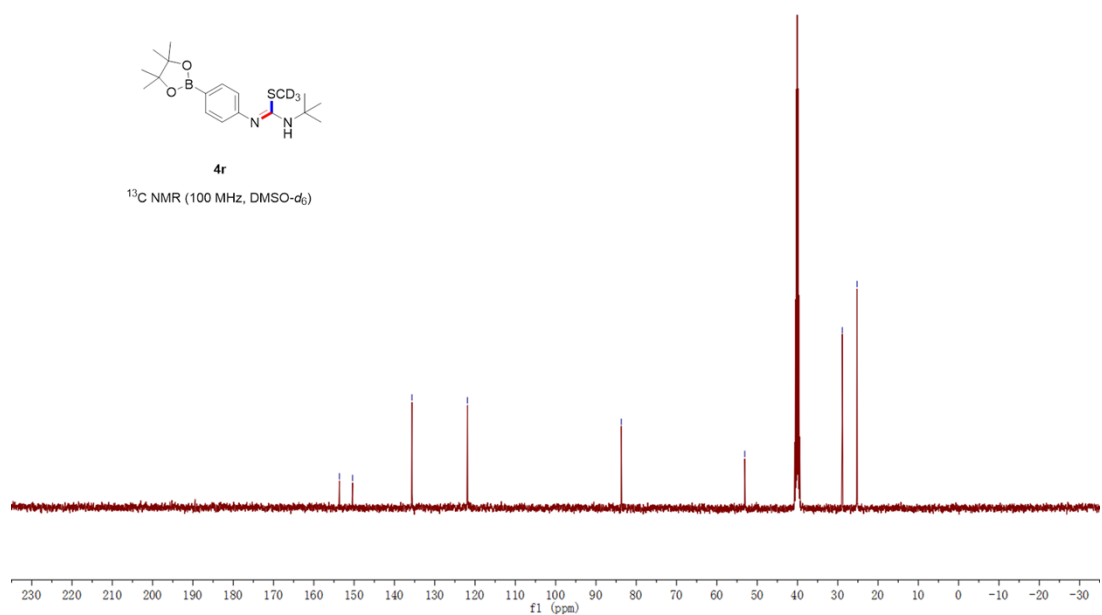

wg1802.1.1.1r

7.84  
7.82  
7.65  
7.63  
7.39  
7.37  
7.35  
7.26  
7.24  
7.22

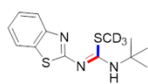

**4s**

<sup>1</sup>H NMR (400 MHz, DMSO-d<sub>6</sub>)

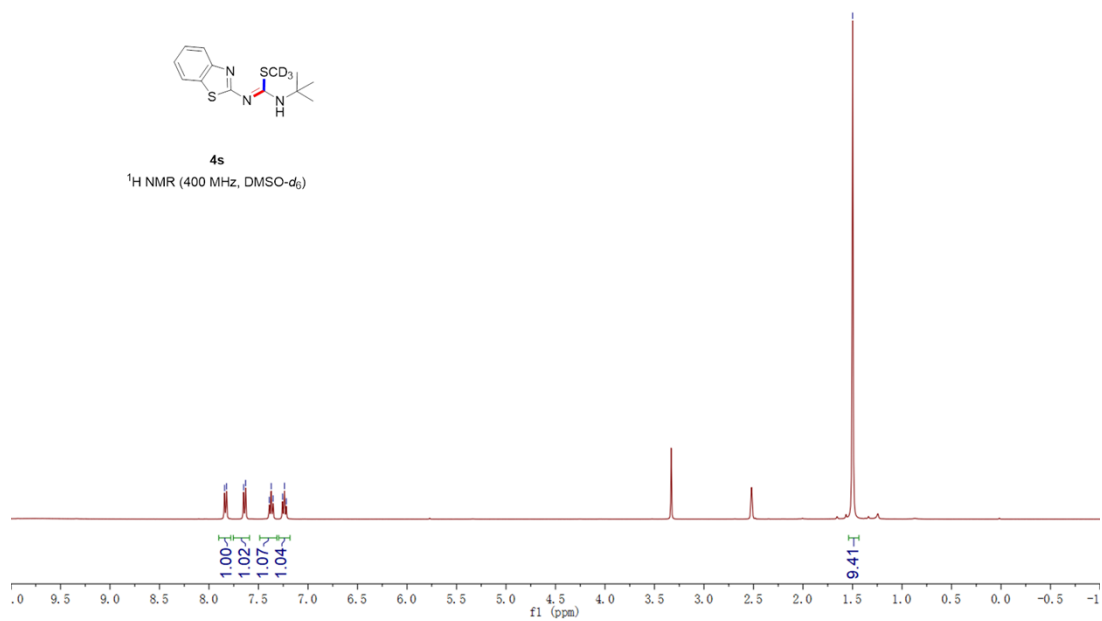

pdata/1

151.43

132.25  
126.29  
123.73  
121.83  
120.63

53.81

29.38

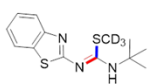

**4s**

<sup>13</sup>C NMR (100 MHz, DMSO-d<sub>6</sub>)

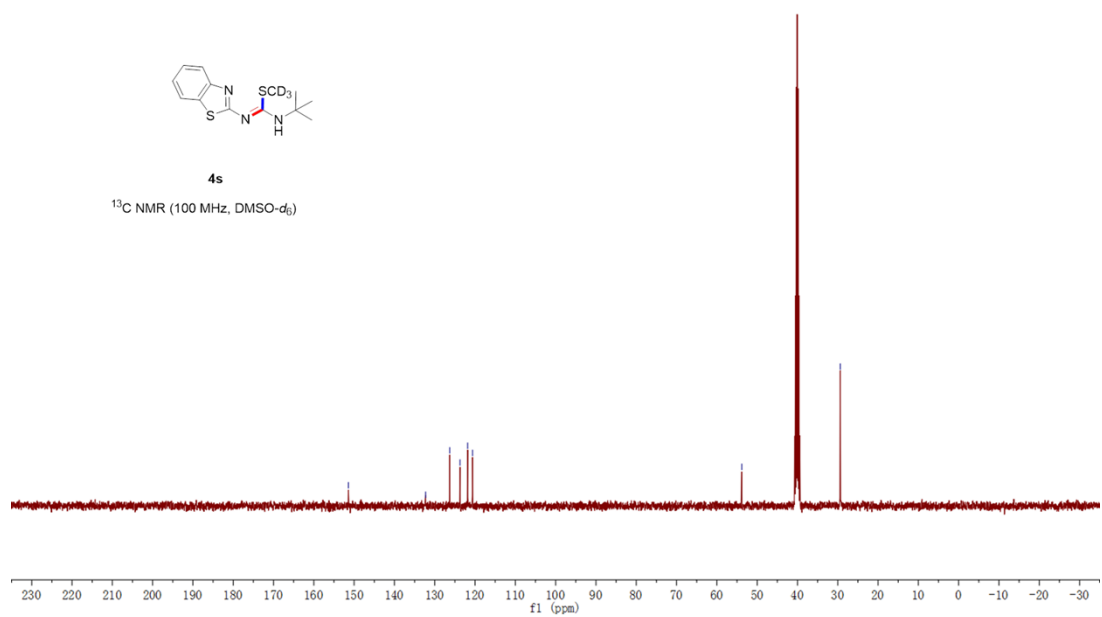

wg1829new.1.1.1

8.90  
8.83  
7.81  
7.79  
7.73  
7.71  
7.44  
7.42  
7.41  
7.40  
7.39  
7.38  
7.36  
7.12  
7.10  
7.08  
6.98  
6.96  
6.95  
6.94

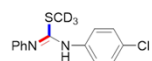

**5a**

<sup>1</sup>H NMR (400 MHz, DMSO-d<sub>6</sub>)

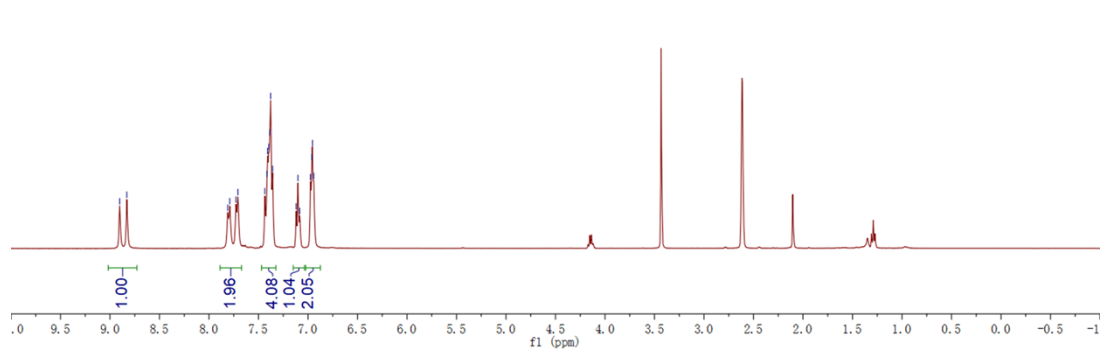

C.1.1.1r

149.64  
148.91  
141.13  
140.35  
129.21  
129.07  
128.93  
128.76  
123.83  
123.14  
122.93  
121.98  
121.79  
120.74

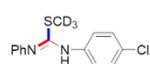

**5a**

<sup>13</sup>C NMR (100 MHz, DMSO-d<sub>6</sub>)

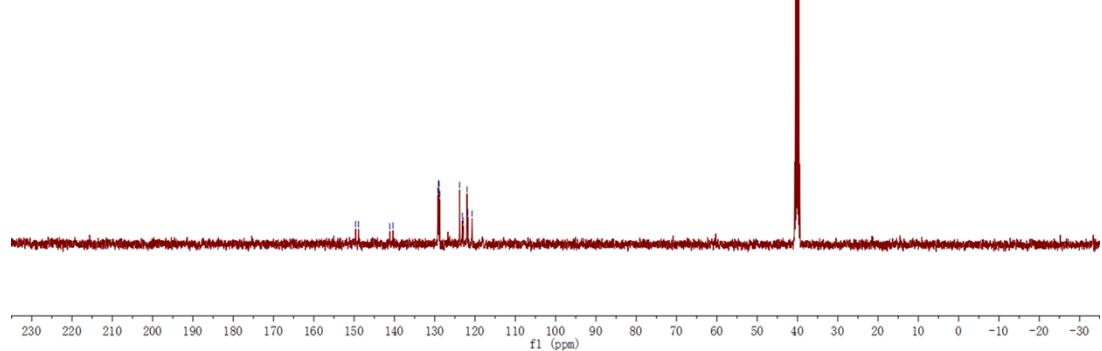

1.1.1.1r

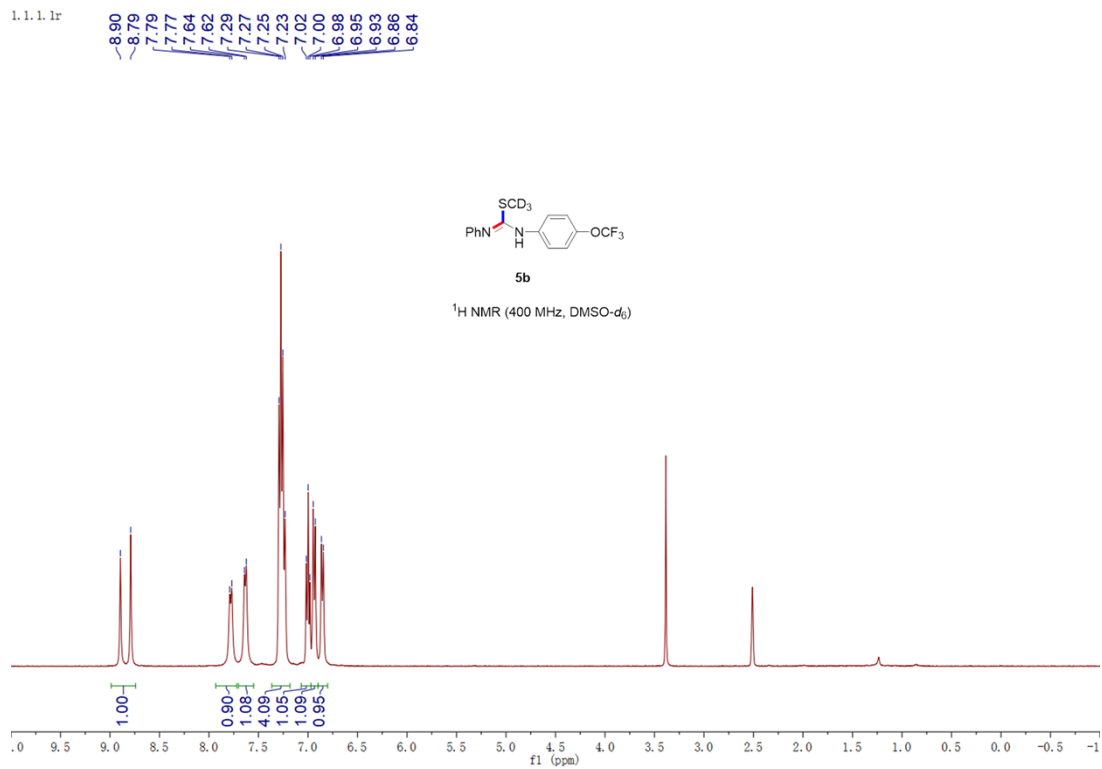

pdata/1

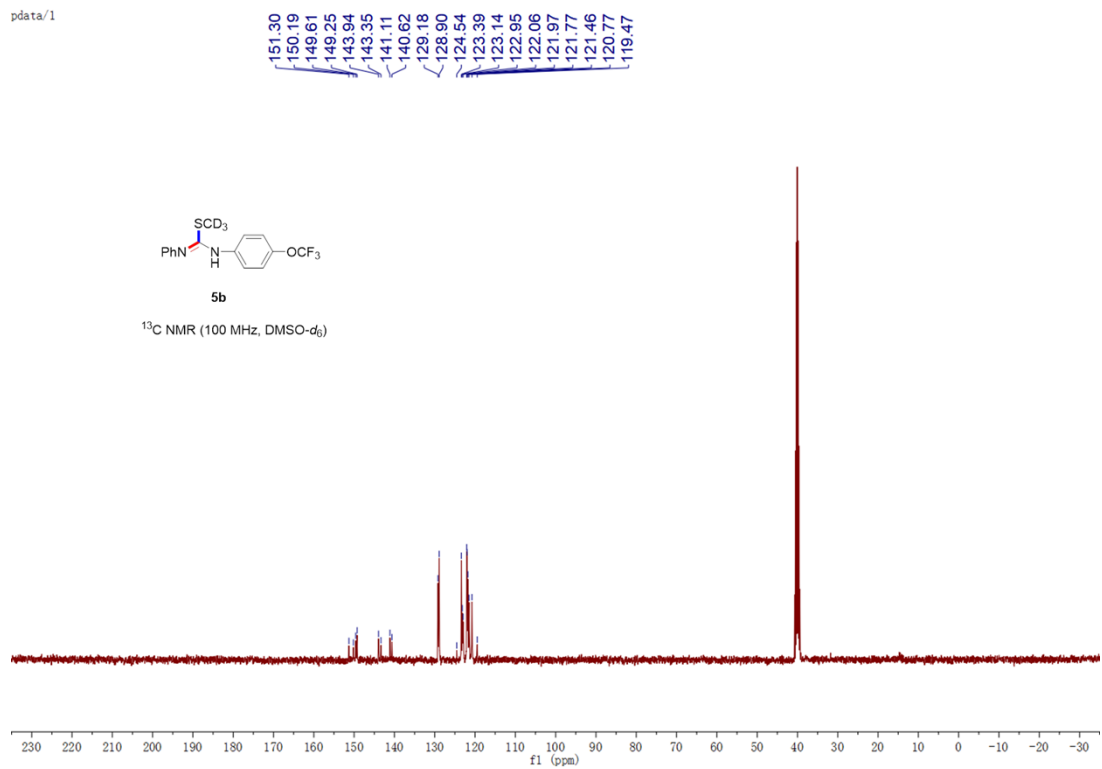

wg-1849. 2.1.1r

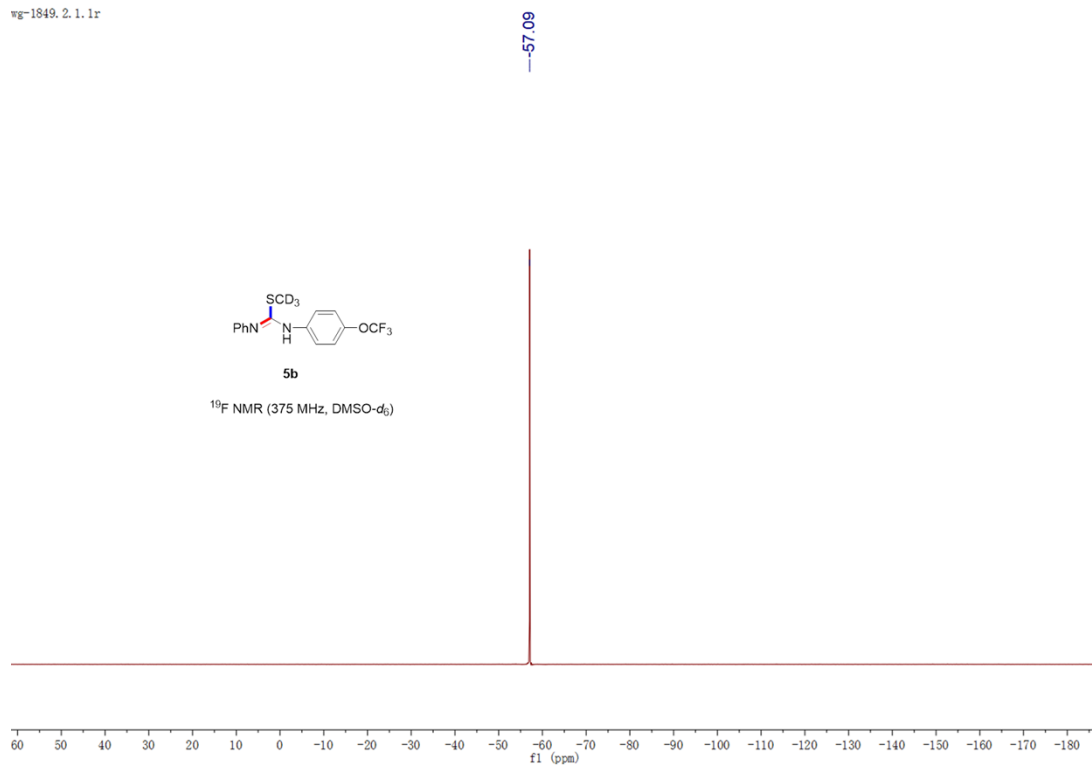

1.1.1.1r

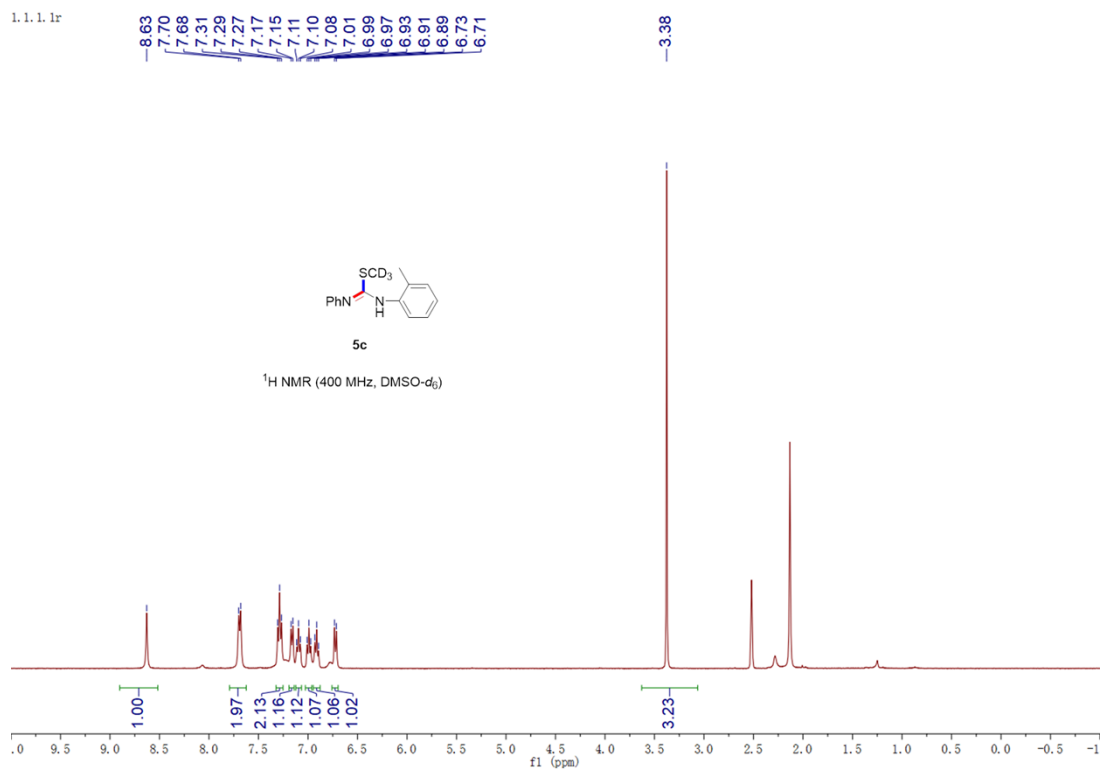

pdata/1

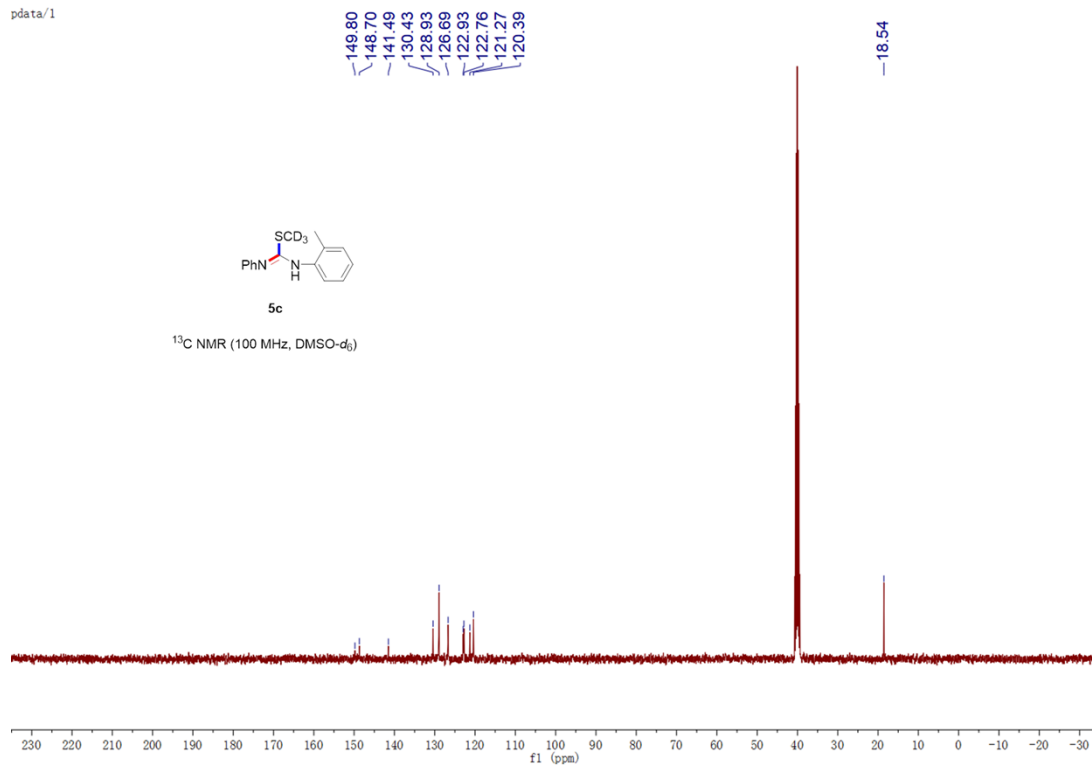

wg1855.1.1.1r

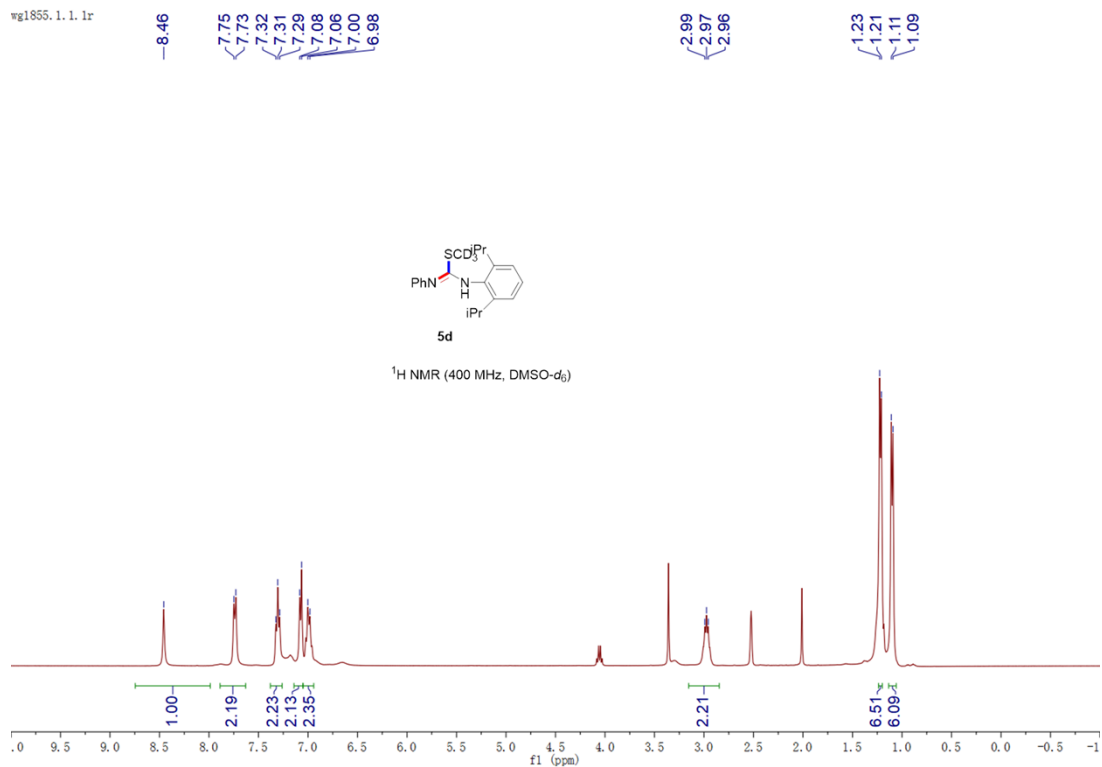

pdata/1

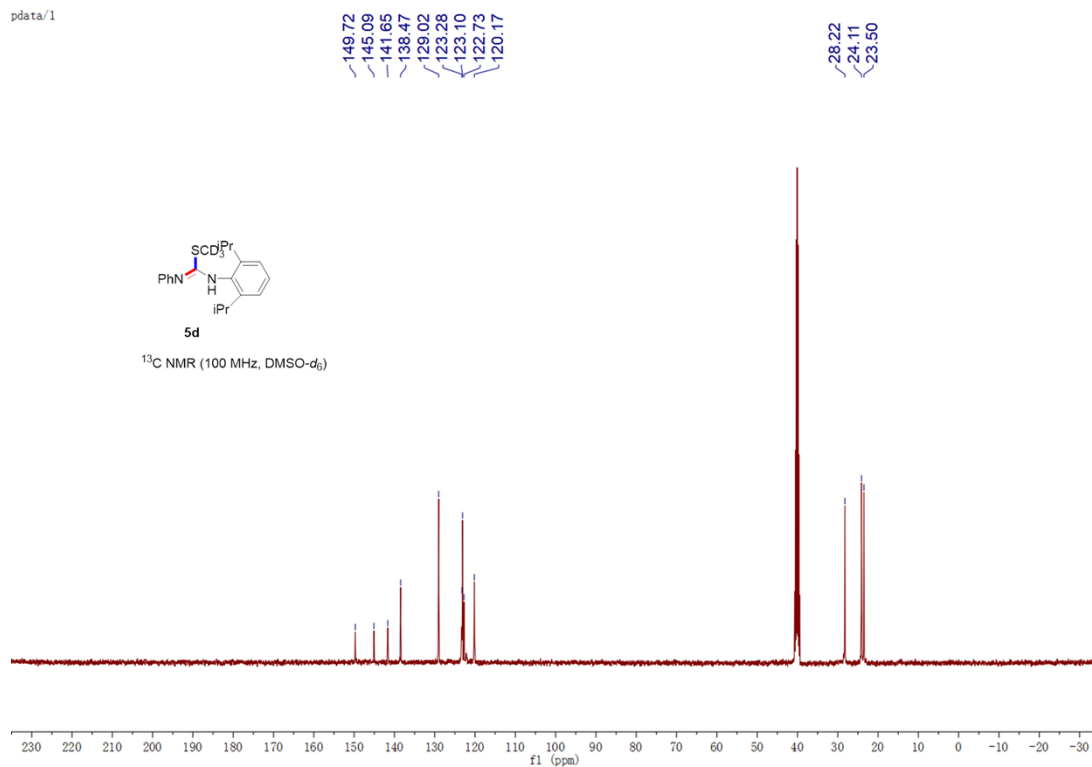

wg-1841.1.1.1r

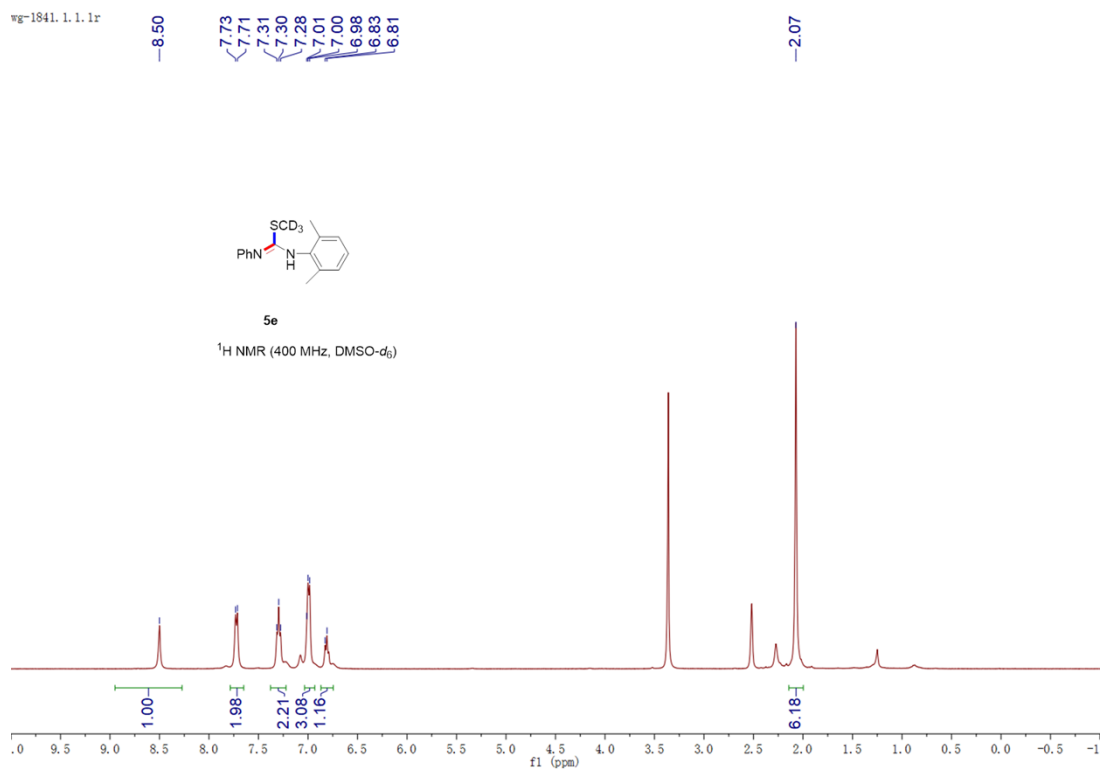

$\sim 149.67$   
 $\sim 147.67$   
 $\sim 141.59$   
 $\sim 128.95$   
 $\sim 128.11$   
 $\sim 122.69$   
 $\sim 122.51$   
 $\sim 120.46$

—18.66

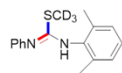<sup>13</sup>C NMR (100 MHz, DMSO-*d*<sub>6</sub>)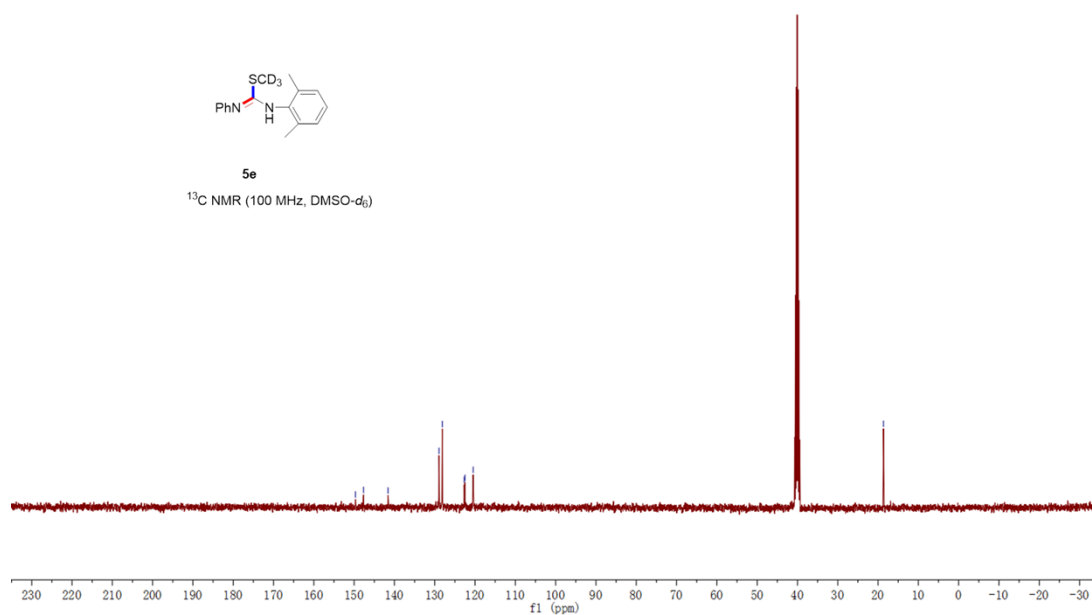

wg-1845. 1. 1. 1. 909

8.06  
7.99

7.10  
7.03

6.95  
6.86  
6.72

6.09

—2.10

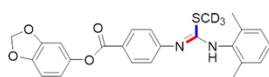<sup>1</sup>H NMR (400 MHz, DMSO-*d*<sub>6</sub>)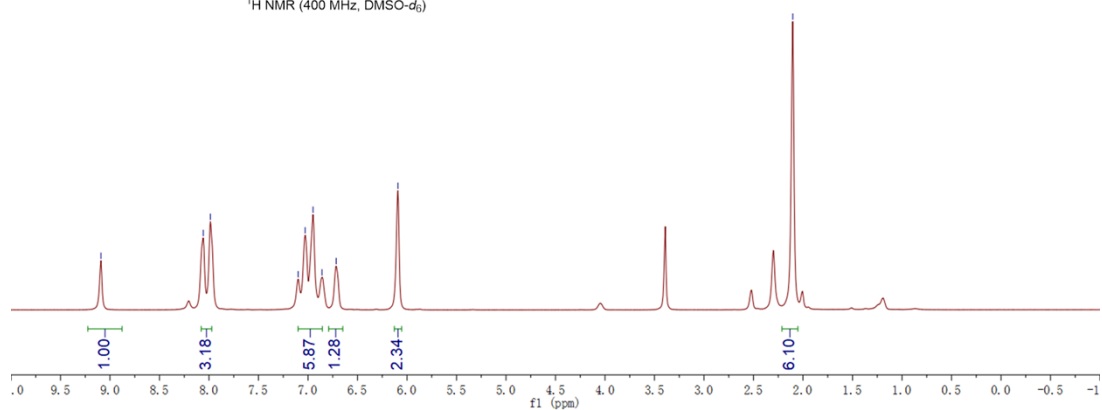

pdata/1

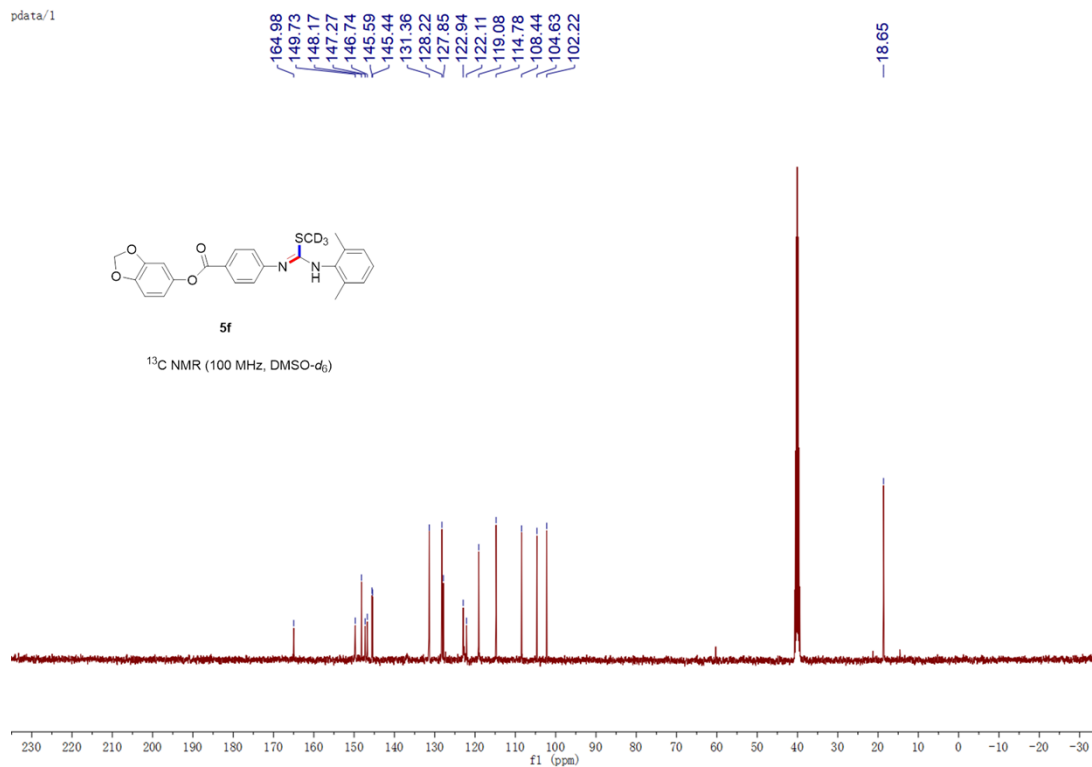

wg1871.1.1.1r

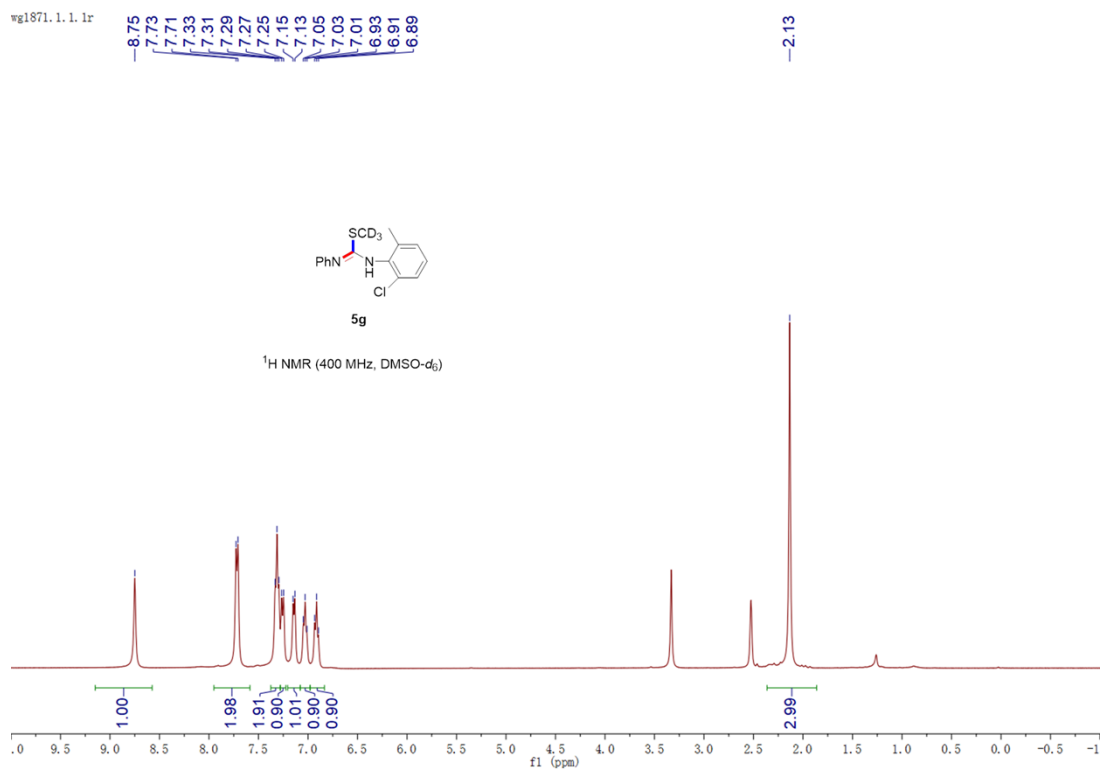

wg1871.2.1.1r

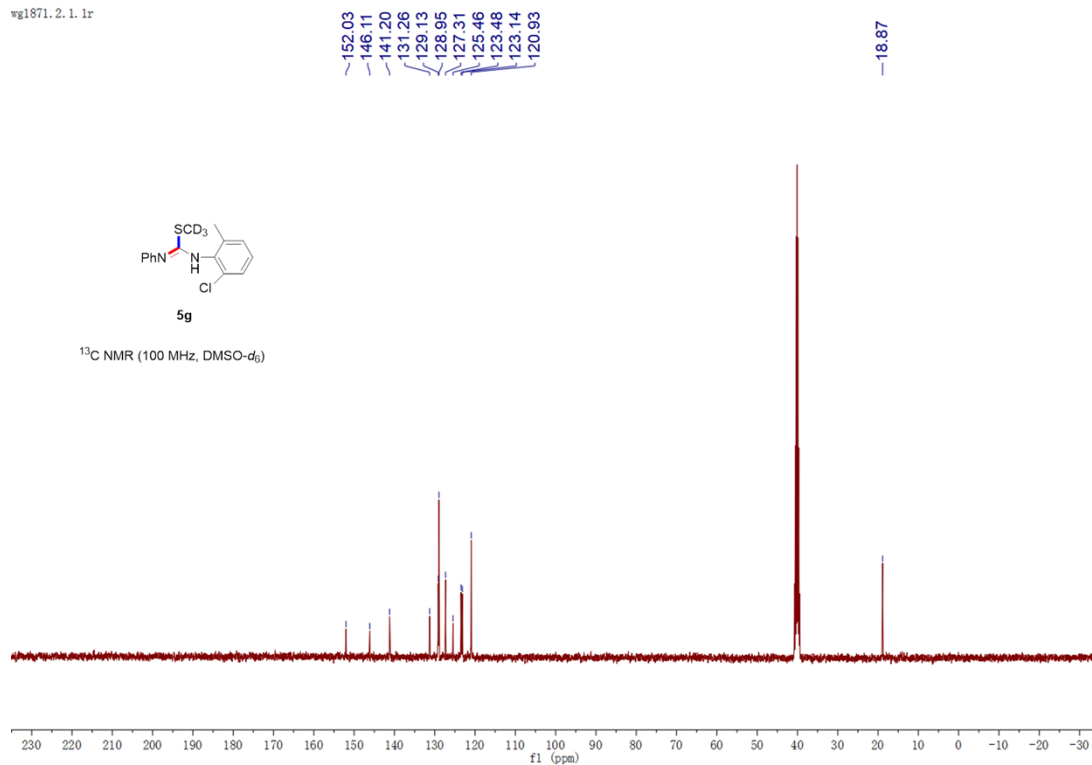

pdata/1

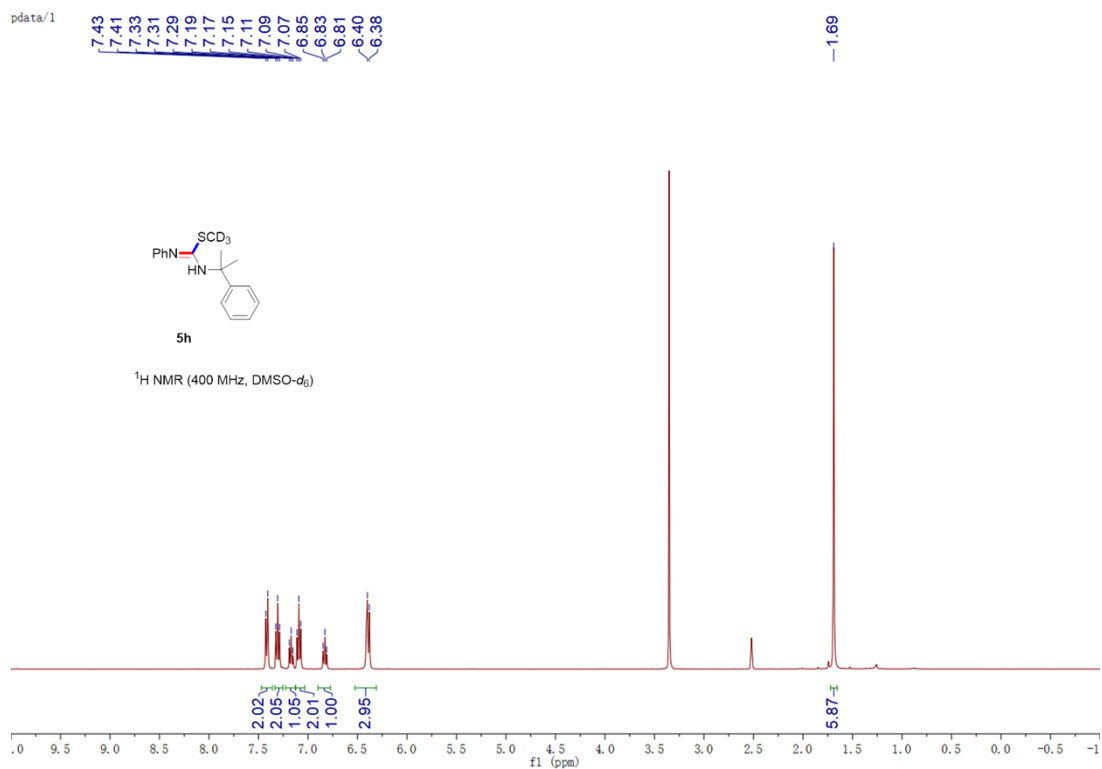

pdata/1

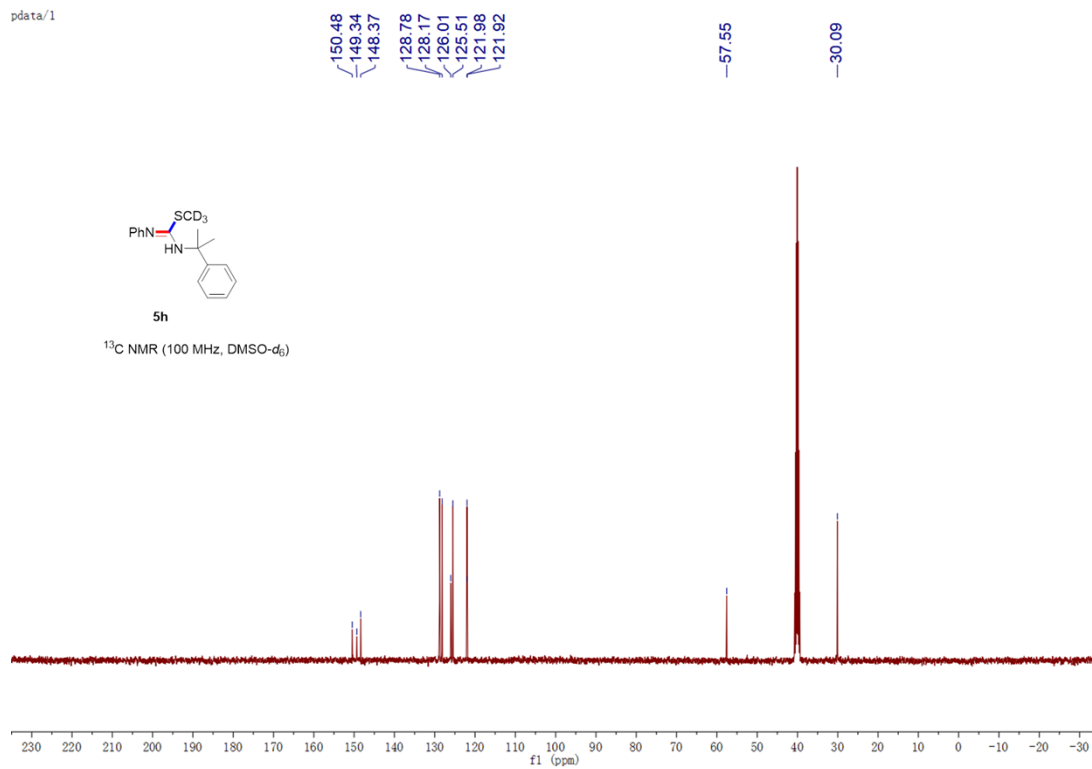

wg1746.1.1.1r

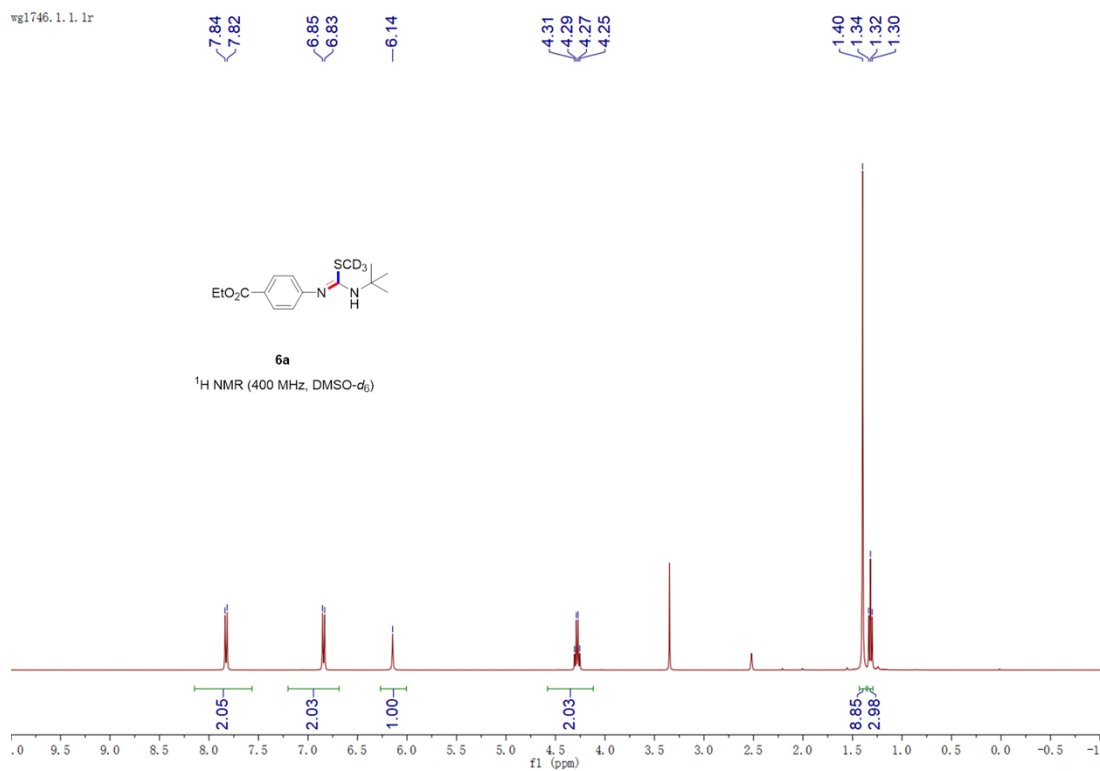

pdata/1

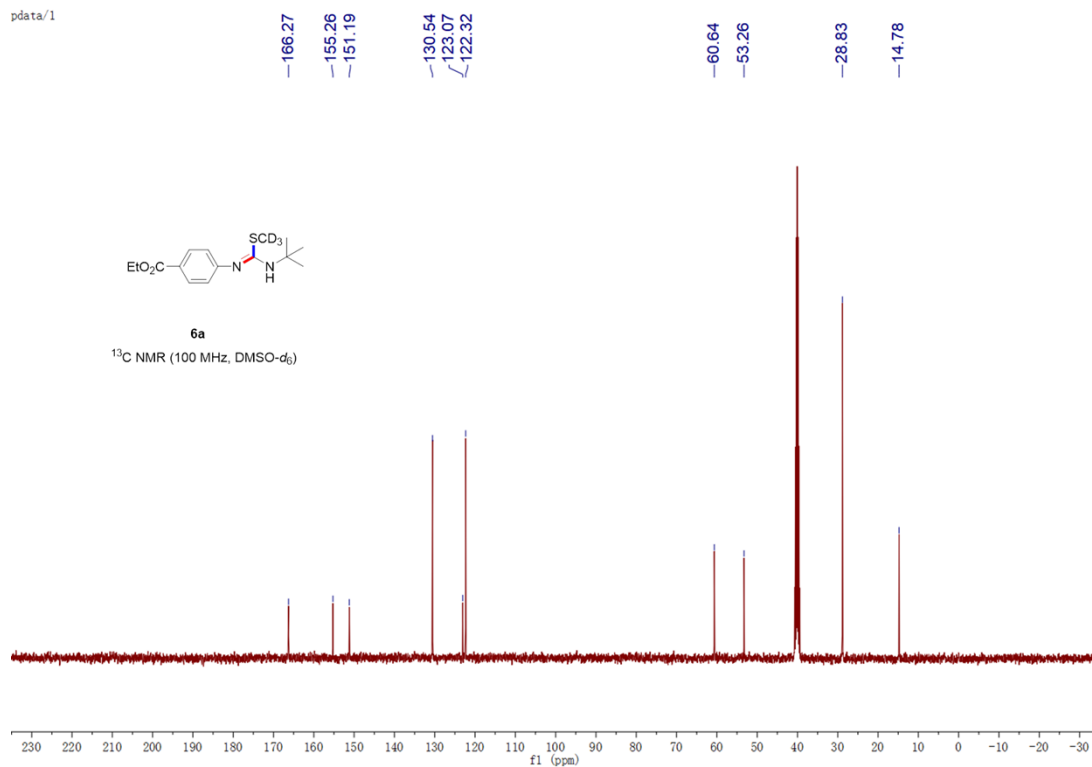

1.1.1.1r

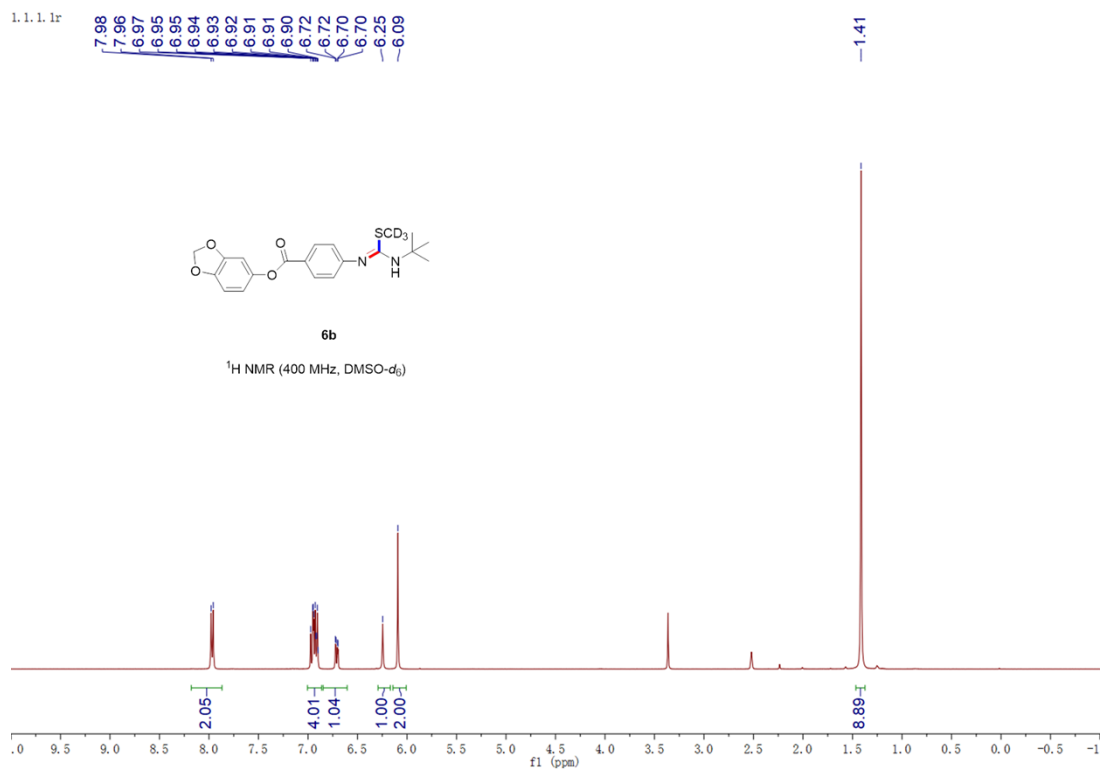

wg-1830. 1.1.1r

165.25  
155.97  
151.43  
148.10  
145.60  
145.35  
131.26  
122.49  
121.78  
114.76  
108.39  
104.65  
102.16  
53.30  
28.79

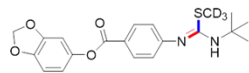

**6b**

$^{13}\text{C}$  NMR (100 MHz,  $\text{DMSO}-d_6$ )

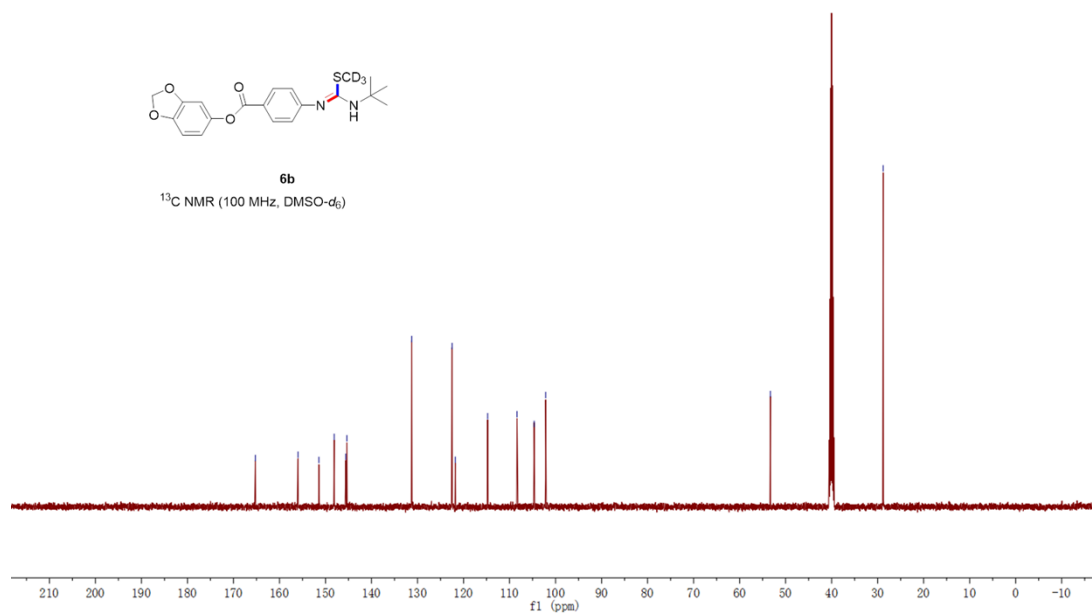

wg-1843. 1.1.1r

7.98  
7.96  
7.31  
7.29  
7.27  
7.23  
7.21  
7.20  
7.17  
7.04  
7.02  
7.00  
6.93  
6.91  
6.25  
3.78  
1.42

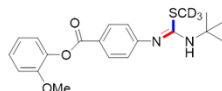

**6c**

$^1\text{H}$  NMR (400 MHz,  $\text{DMSO}-d_6$ )

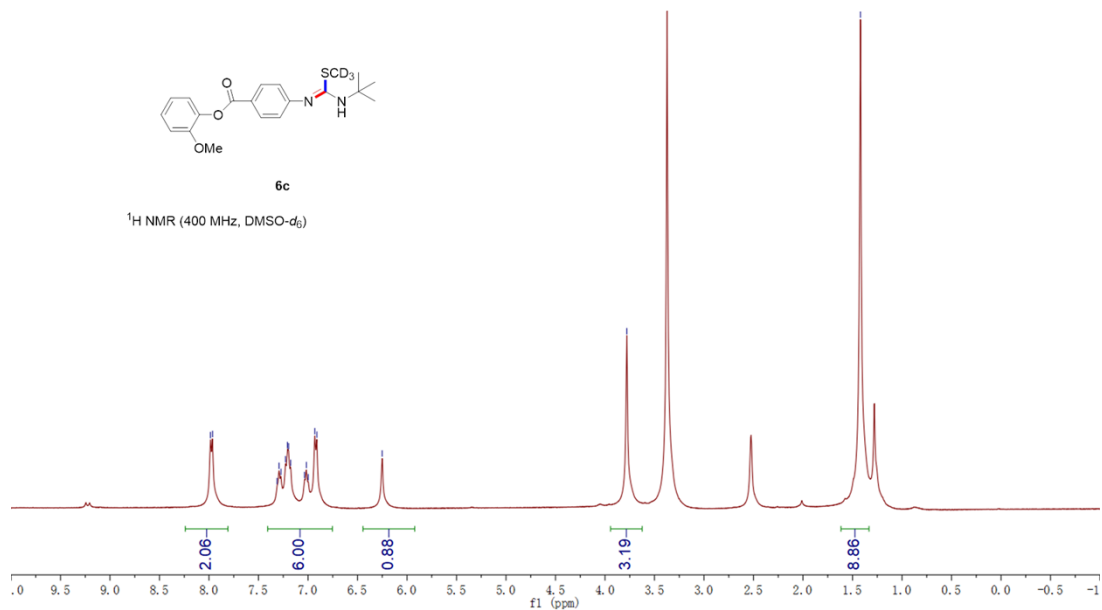

wg-1843. 1.1.1r

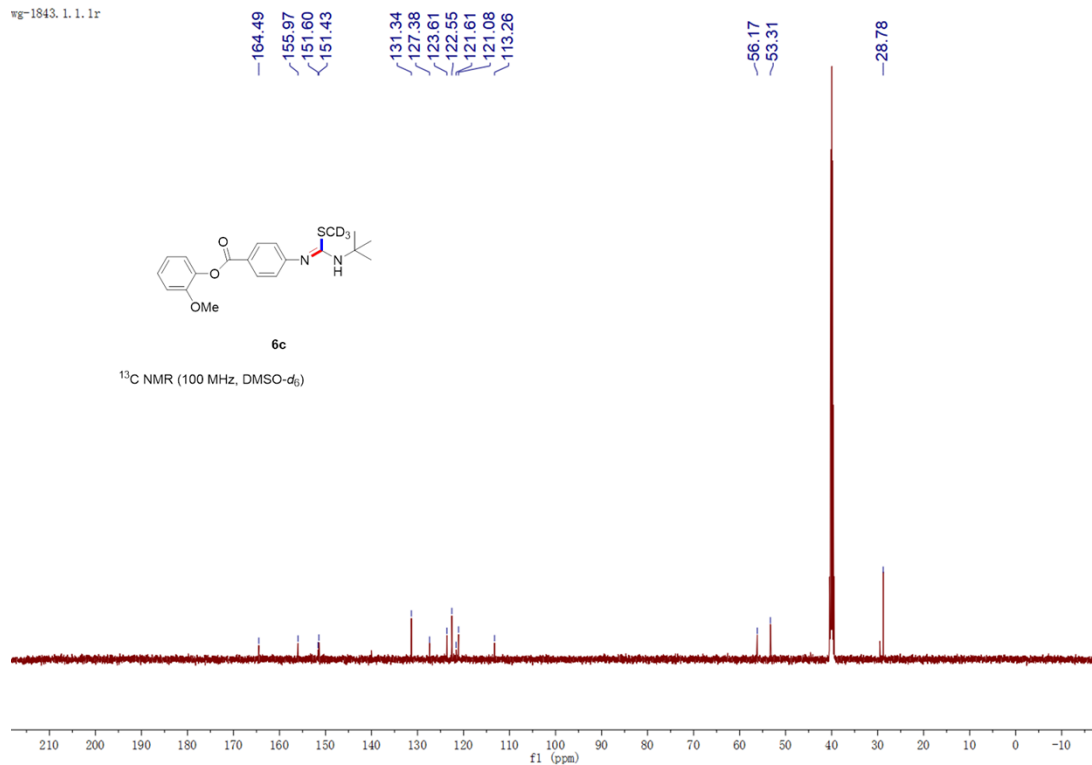

1.1.1.1r

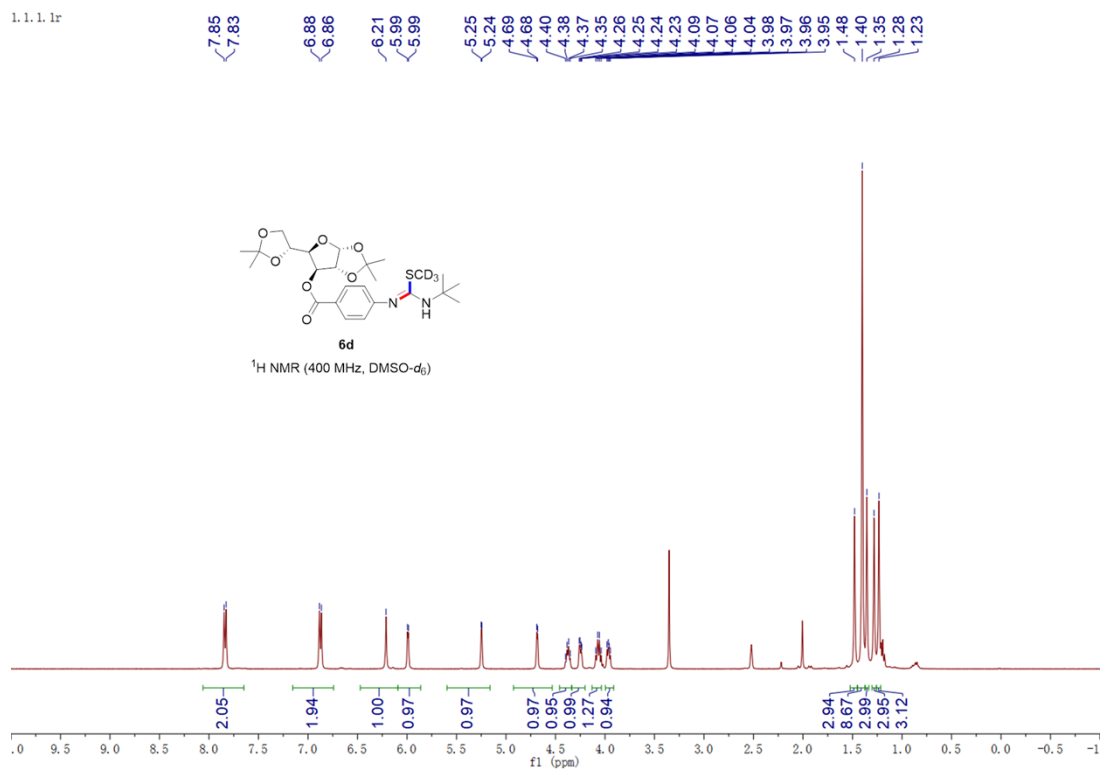

wg-1831.1.1.1r

165.20  
155.84  
151.35  
130.82  
122.45  
121.99  
111.79  
108.95  
105.20  
83.28  
79.60  
76.34  
72.61  
66.72  
60.22  
53.27  
28.77  
27.10  
26.92  
26.44  
25.55  
21.21  
14.55

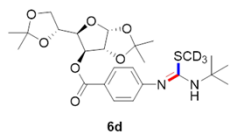

<sup>13</sup>C NMR (100 MHz, DMSO-d<sub>6</sub>)

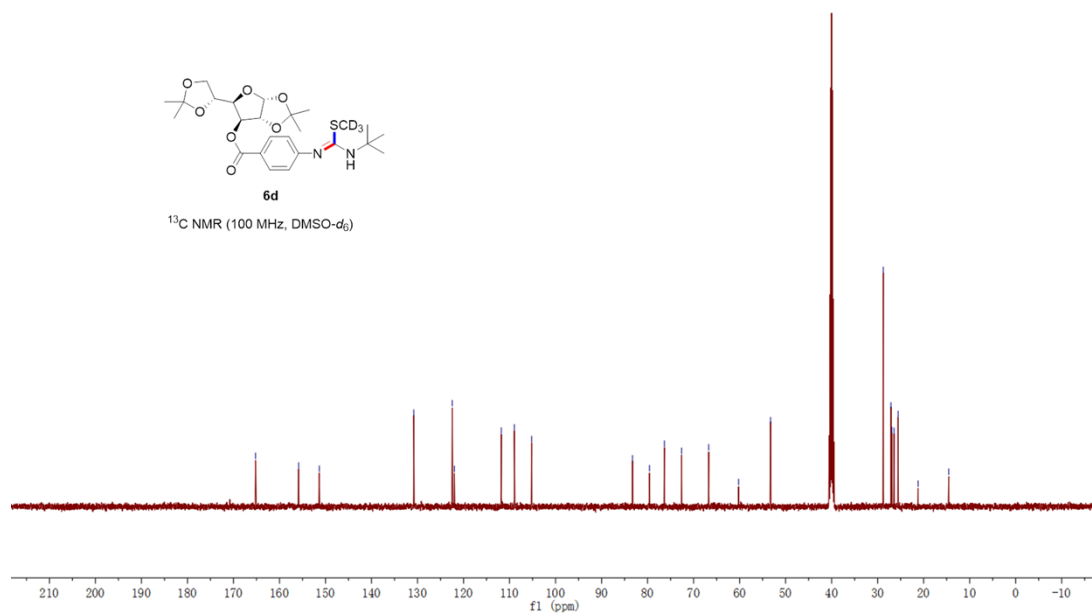

wg-1842.1.1.1r

7.98  
7.96  
7.15  
6.93  
6.91  
6.27  
2.37  
1.41

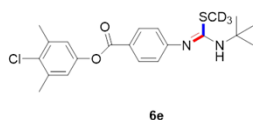

<sup>1</sup>H NMR (400 MHz, DMSO-d<sub>6</sub>)

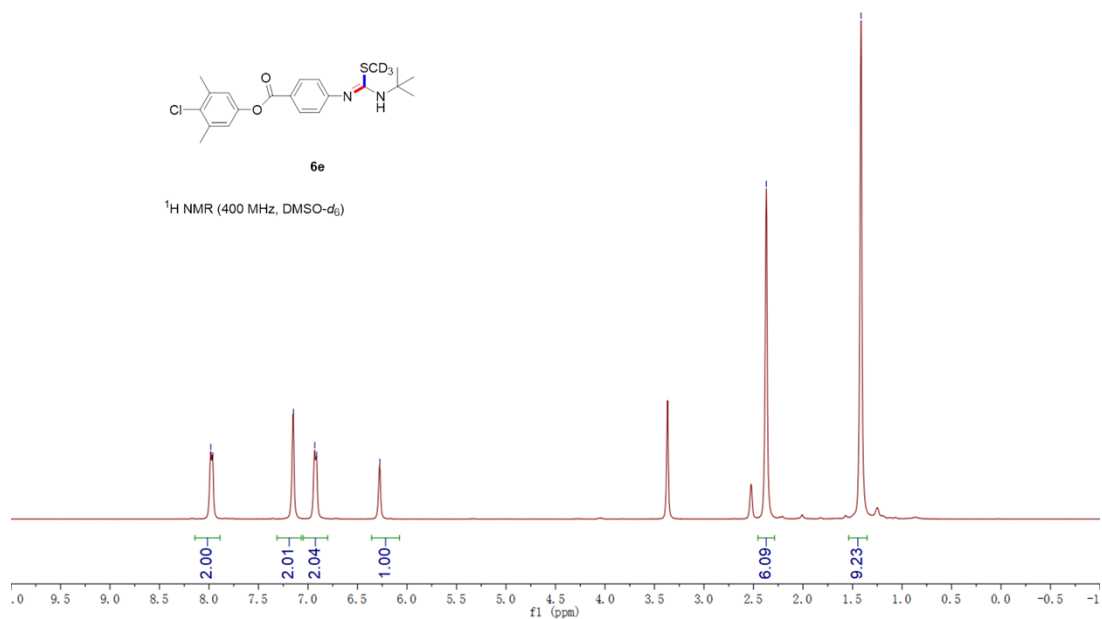

wg-1842.1.1.1r

164.95  
156.08  
151.48  
149.18  
137.37  
131.31  
130.93  
122.57  
121.51

53.31

28.77

20.72

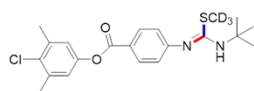

**6e**

$^{13}\text{C}$  NMR (100 MHz,  $\text{DMSO}-d_6$ )

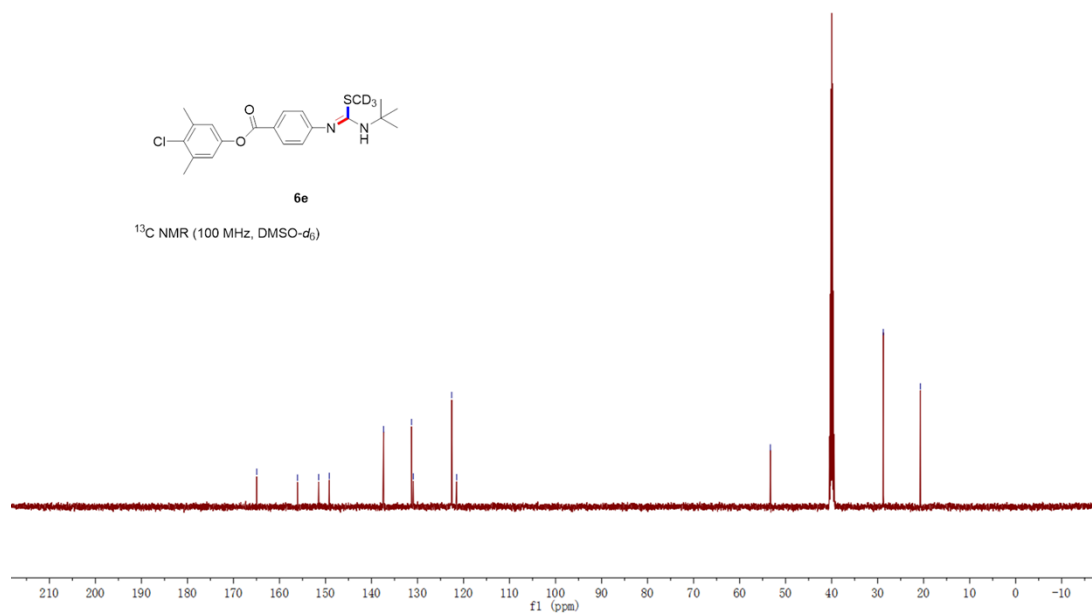

7.46  
7.44  
7.44  
7.42  
7.37  
7.36  
7.35  
7.35  
7.33  
7.32  
7.30  
7.30  
7.28  
7.27  
7.26  
7.25

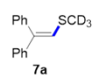

**7a**

$^1\text{H}$  NMR (400 MHz,  $\text{CDCl}_3$ )

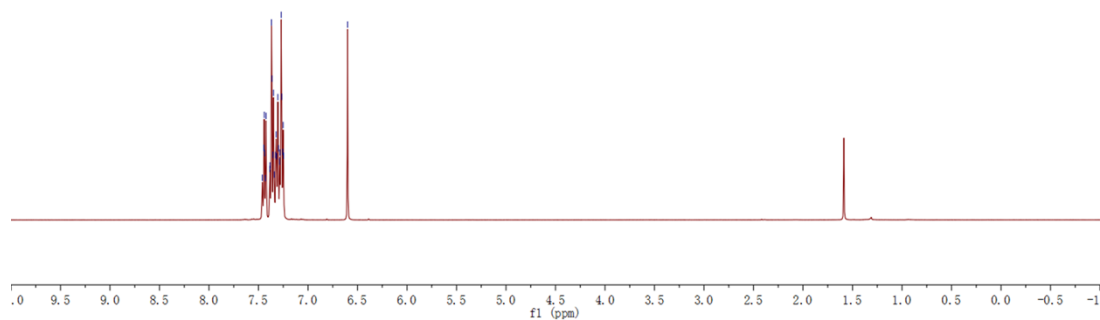

pdata/1

141.83  
138.58  
138.50  
129.78  
128.41  
128.33  
127.60  
126.93

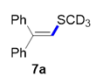

<sup>13</sup>C NMR (100 MHz, CDCl<sub>3</sub>)

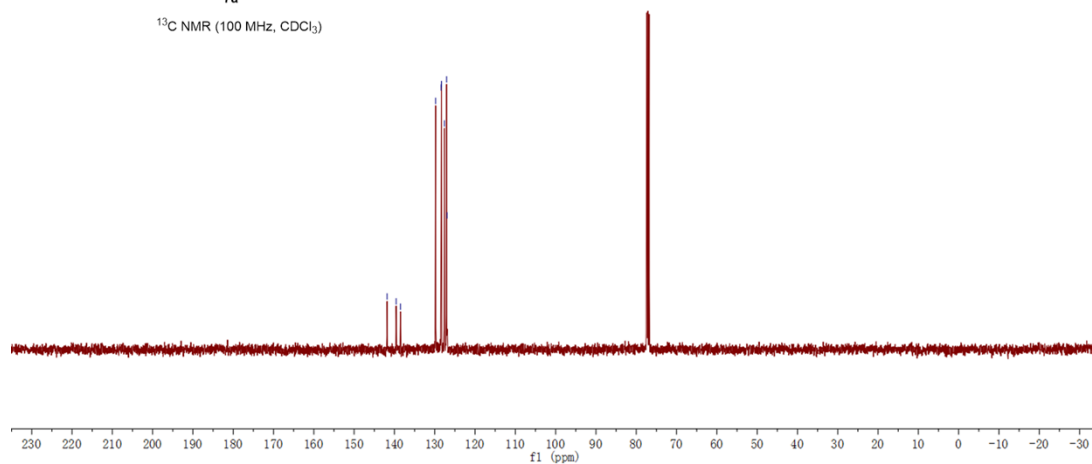

# HRMS of Products

1766

vg20240318-171 (1.395) AM2 (Ar,20000,0,0,0,0,0,0); Cm (71-7x1.500)

1: TCFMSEst  
1.54e6

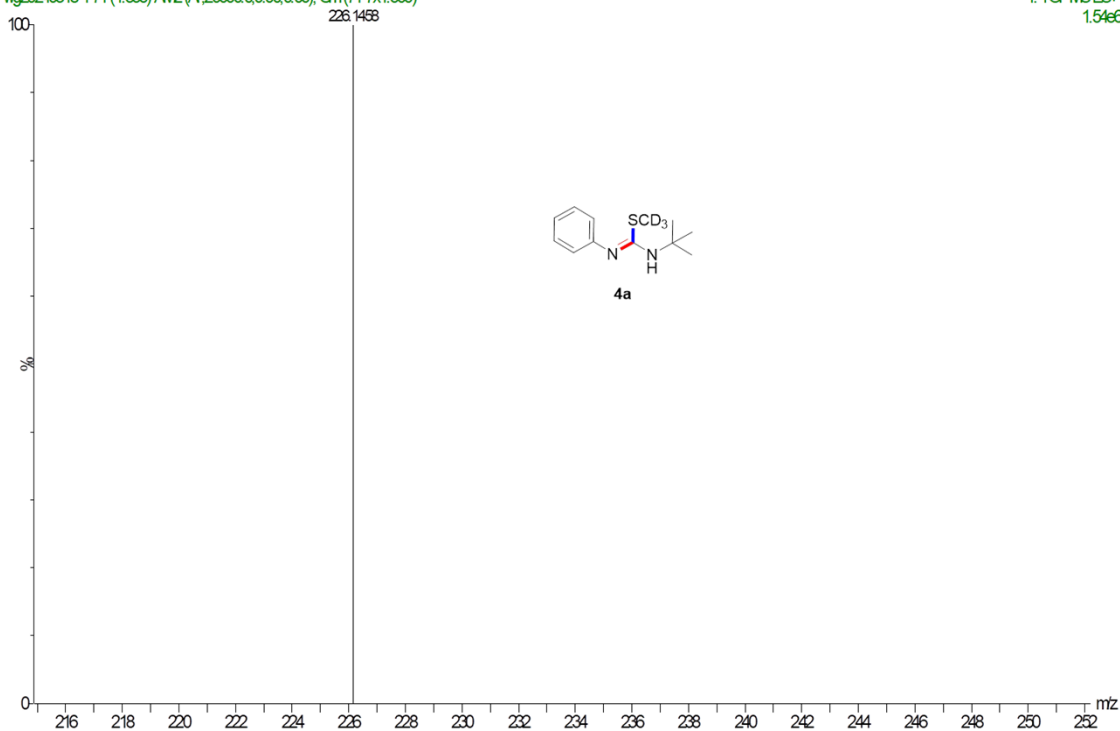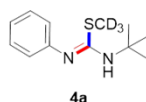

1729

vg20240318-275 (1.483) AM2 (Ar,20000,0,0,0,0,0,0); Cm (75-8x1.500)

1: TCFMSEst  
9.43e6

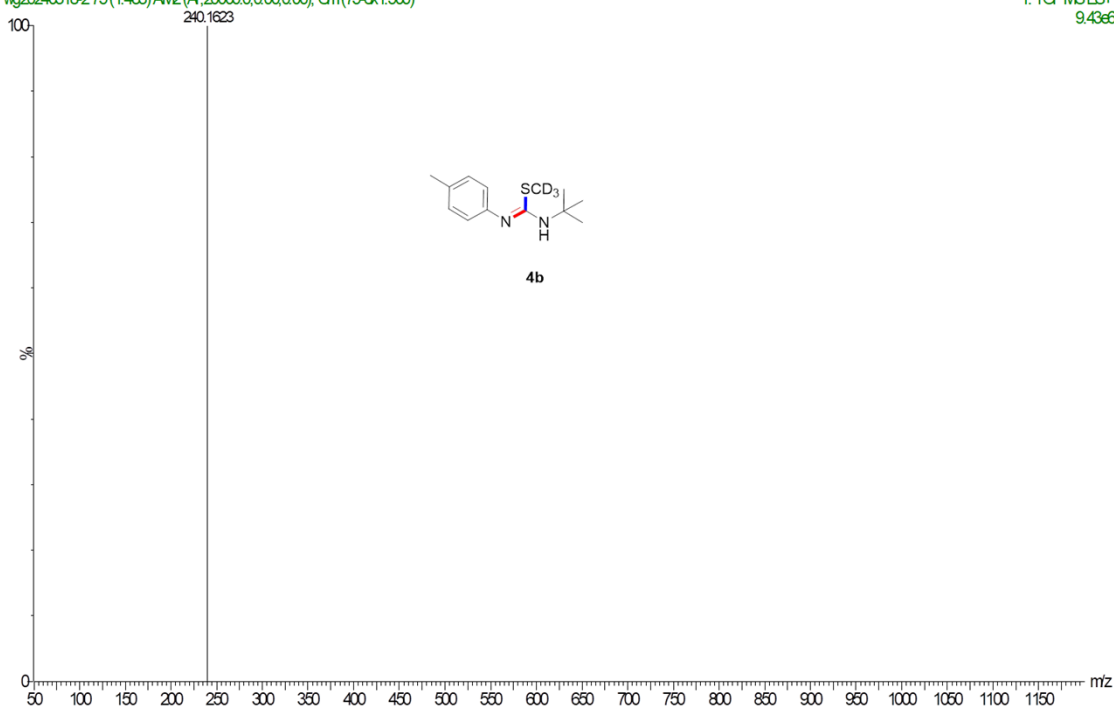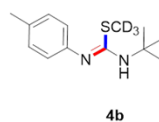

1744

vg20240318-172 (1.412) AM2 (Ar, 20000, 0.0, 0.0, 0.00); Cm (72-5x1.500)

1: TCFMSES+  
5.4466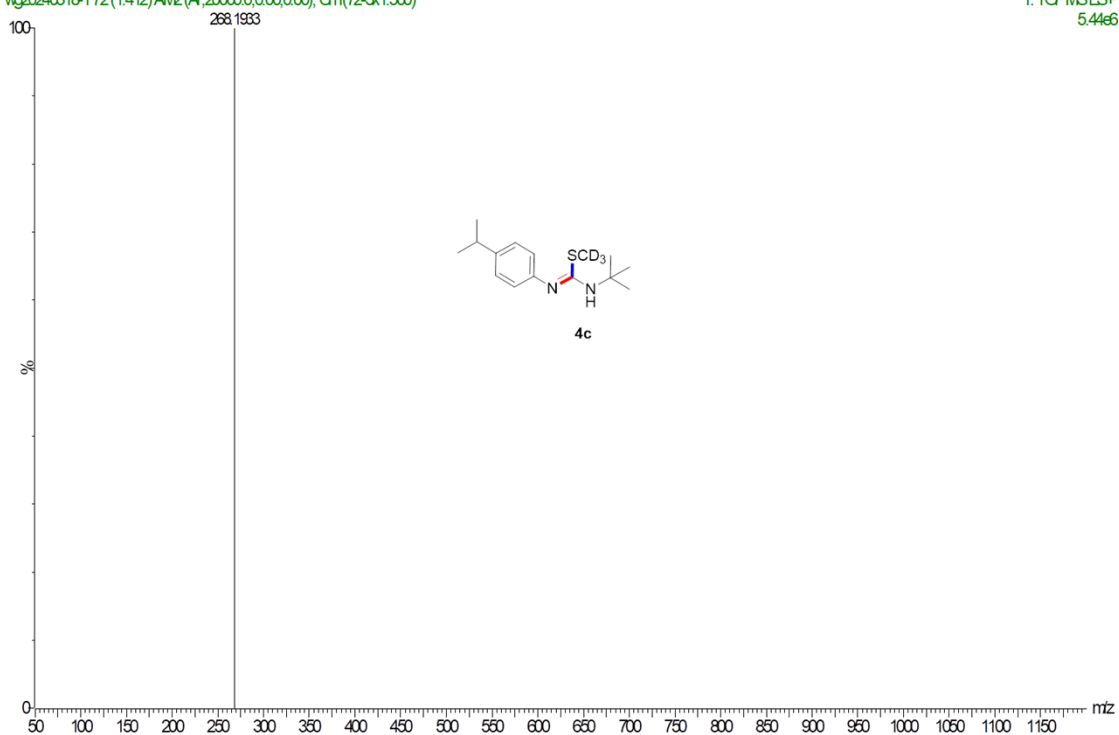

1735

vg20240318-374 (1.466) AM2 (Ar, 20000, 0.0, 0.0, 0.00); Cm (74-7x1.500)

1: TCFMSES+  
5.1766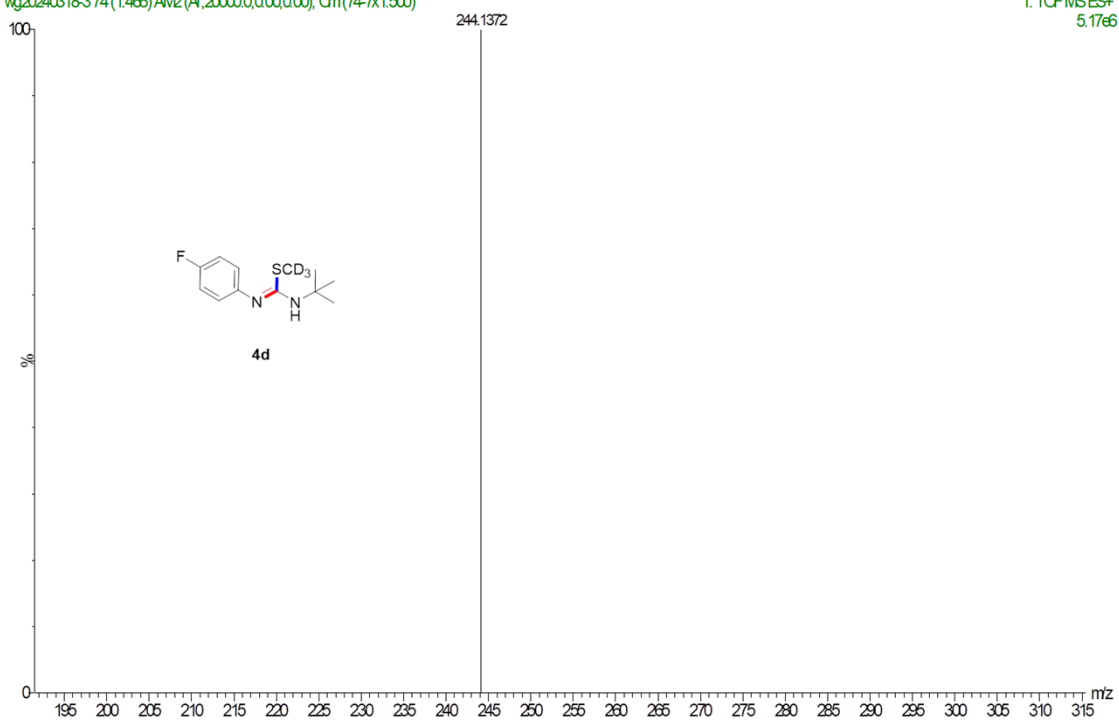

1728

vg20240318-4 70 (1.378) AM2 (Ar,20000,0,0.00,0.00); Cm(70-8x1.500)

1: TCFMSESI+  
1.31e6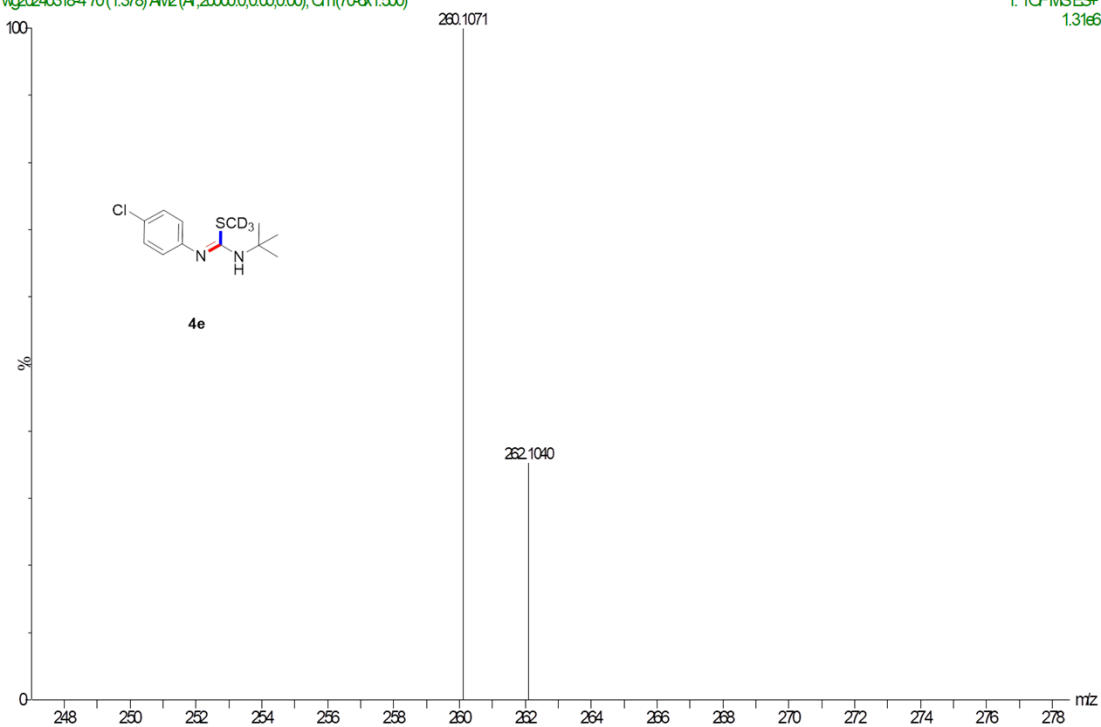

1722

vg20240318-5 64 (1.257) AM2 (Ar,20000,0,0.00,0.00); Cm(64-8x1.500)

1: TCFMSESI+  
8.63e5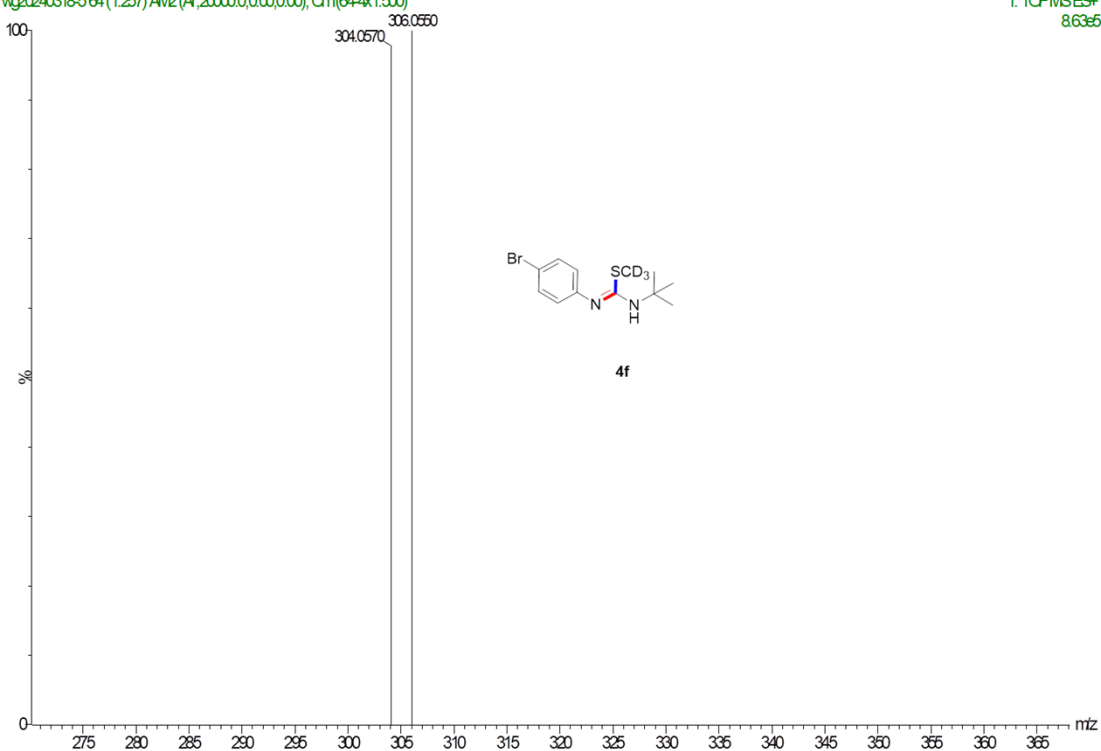

1737

vg0240318-4-2.75 (1.483) AM2 (Ar, 20000, 0.000, 0.00); Qm(75-7x1.500)

1: TCFMSEst  
1.2687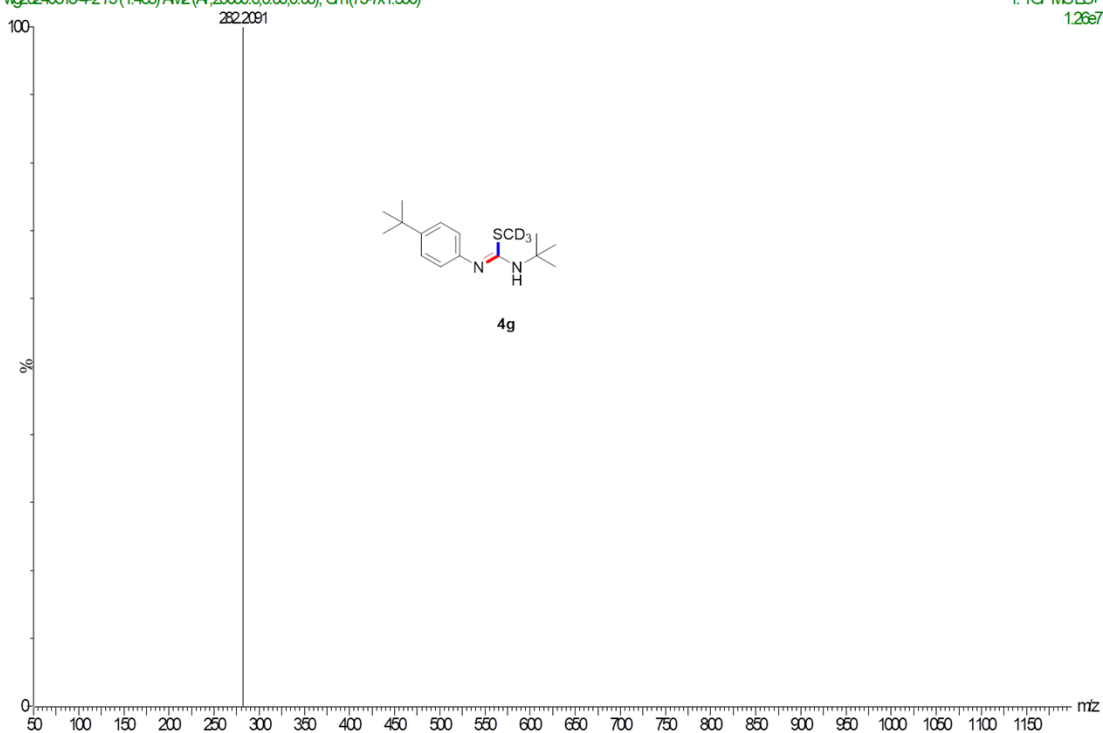

1731

vg0240318-6.70 (1.378) AM2 (Ar, 20000, 0.000, 0.00); Qm(70-8x1.500)

1: TCFMSEst  
1.2286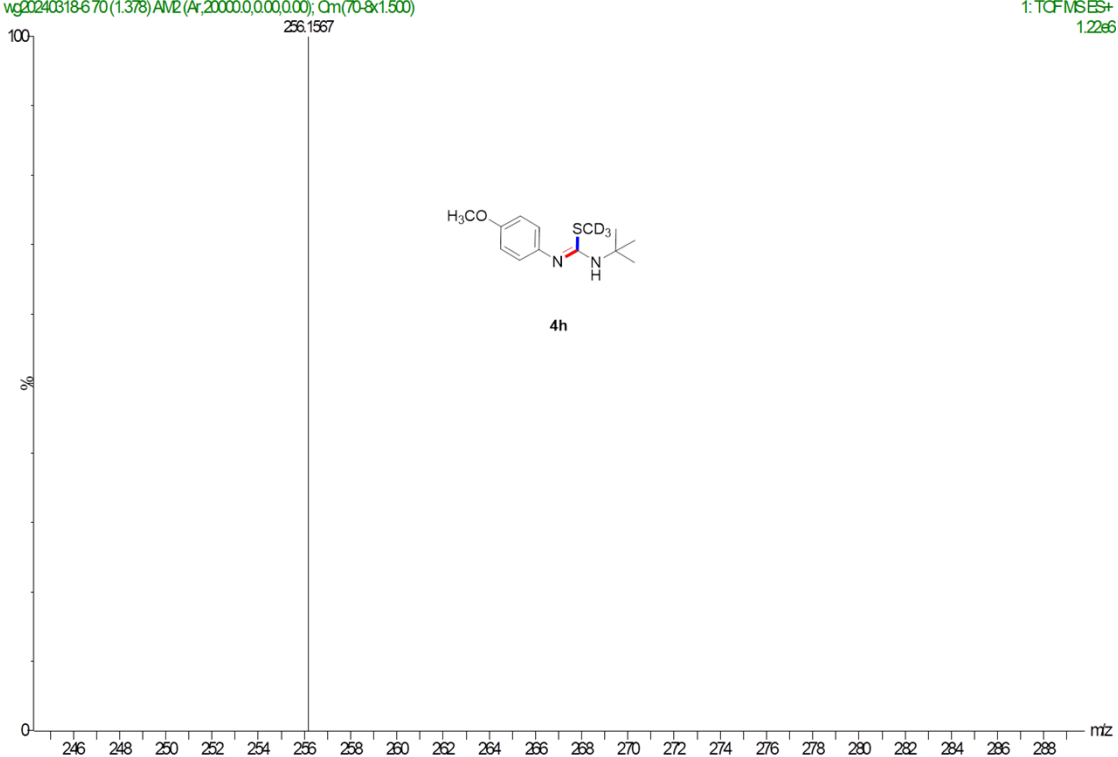

1734

vg20240318-7 66 (1.311) AM2 (Ar, 20000.0, 0.00, 0.00); Cm (66-5x1.500)

1: TCFMSES+  
5.1066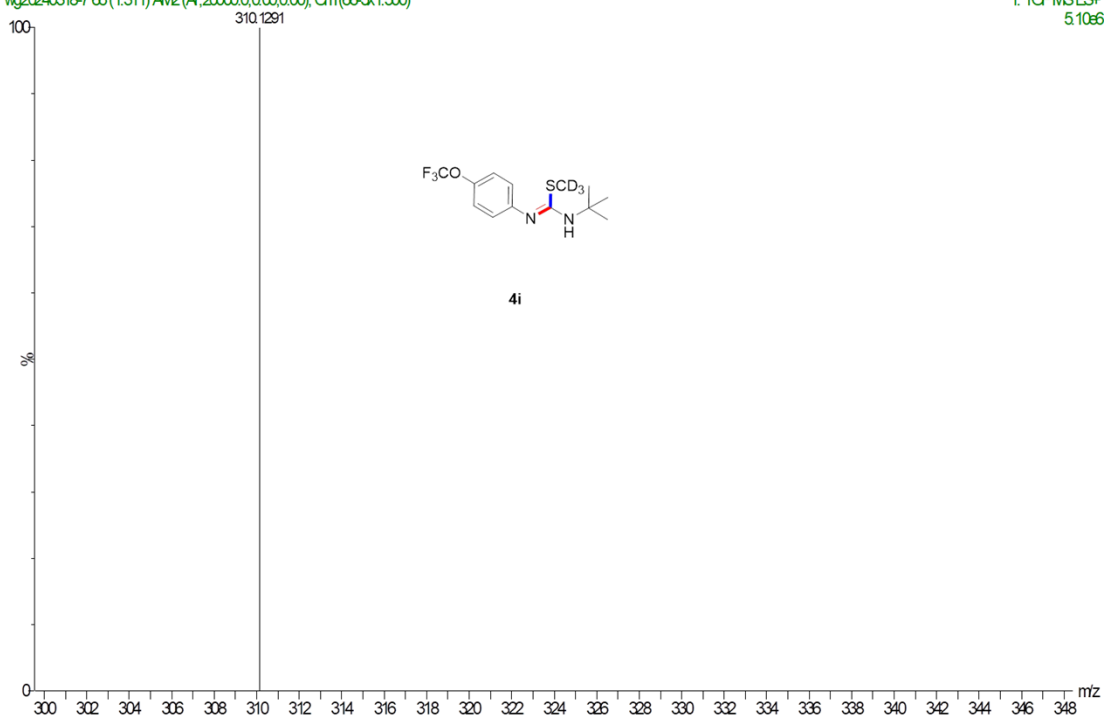

1793

vg20240318-8 65 (1.294) AM2 (Ar, 20000.0, 0.00, 0.00); Cm (65-7x1.500)

1: TCFMSES+  
2.0366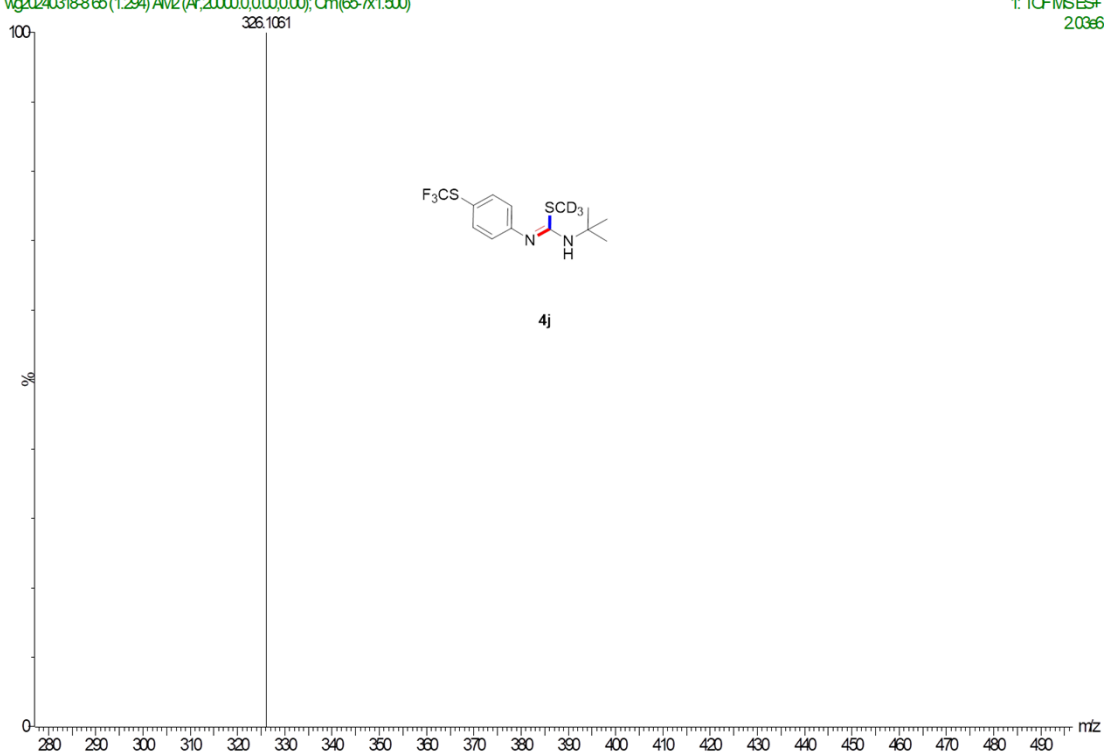

1736

wg20240318-971 (1.395) AM2 (Ar,20000.0,0.00,0.00); Cm(71-6x1.500)

1: TQFMS ES+  
7.5766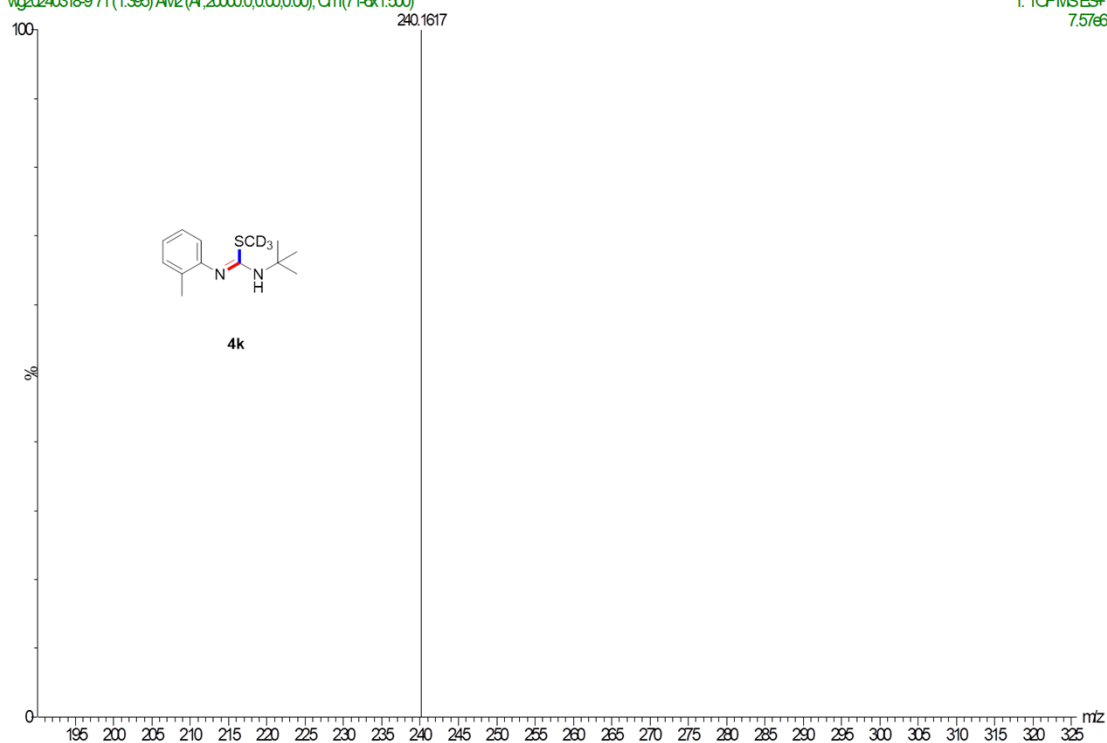

1769

wg20240318-671 (1.395) AM2 (Ar,20000.0,0.00,0.00); Cm(71-6x1.500)

1: TQFMS ES+  
6.7586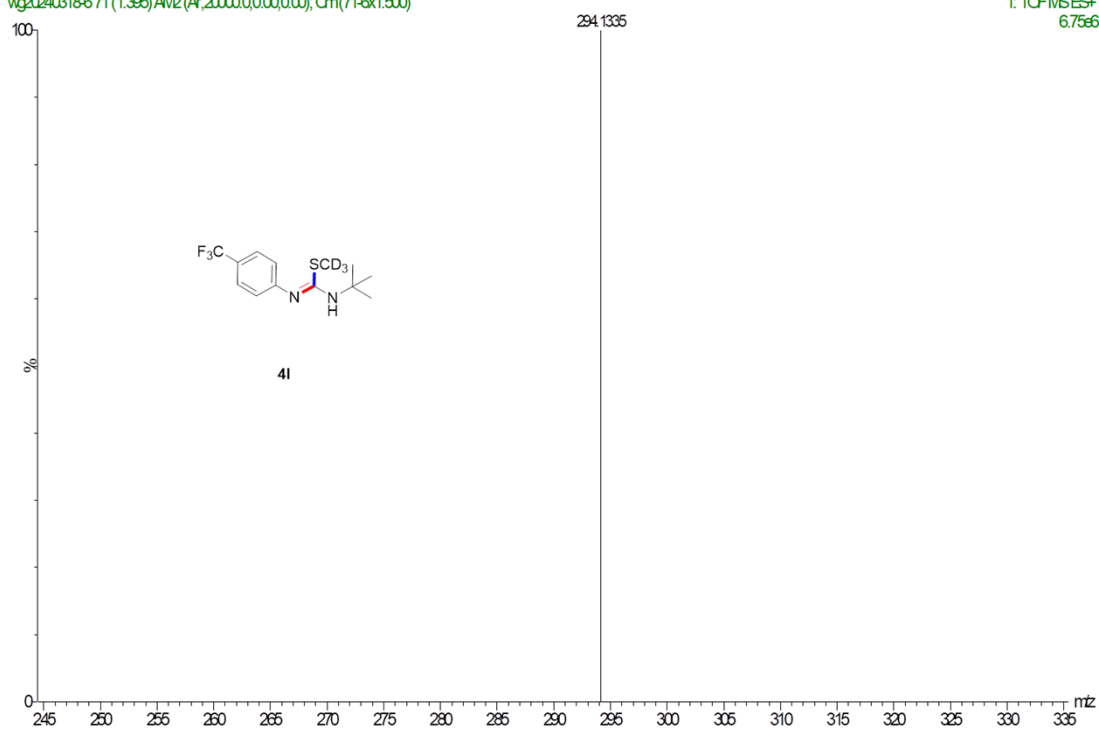

1800

vg20240318-10.43 (0.863) AM2 (Ar,20000,0,0.00,0.00); Cm(43-7x1.500)

1: TCFMSEst  
4.7966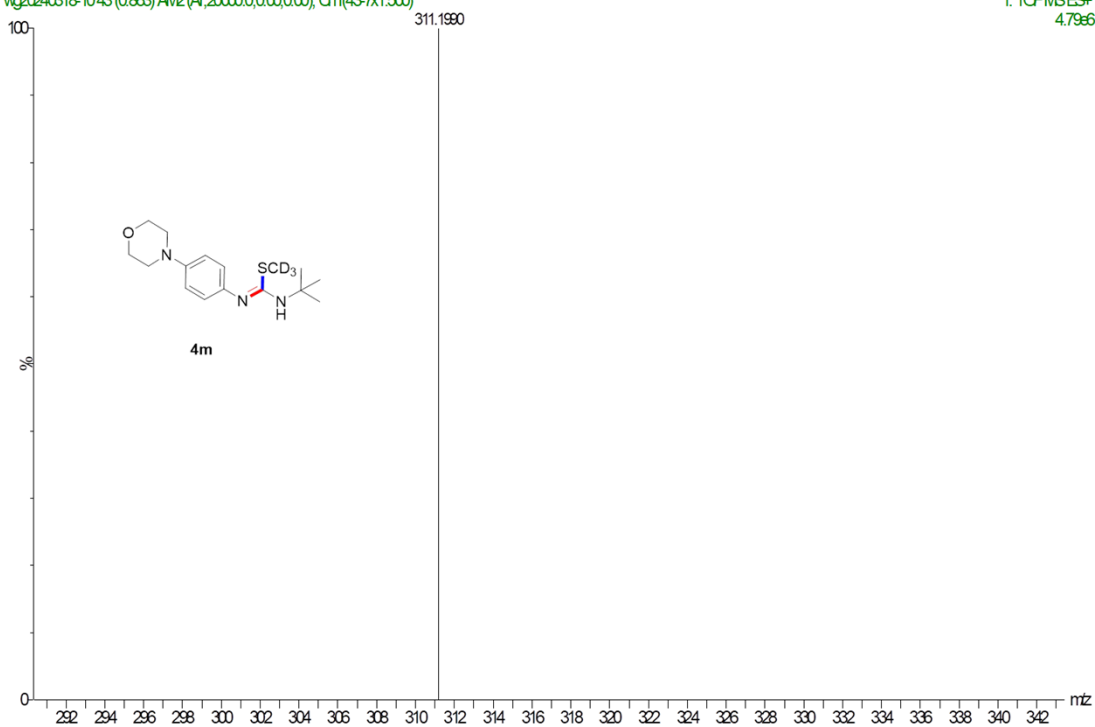

1804

vg20240318-11.73 (1.449) AM2 (Ar,20000,0,0.00,0.00); Cm(73-5x1.500)

1: TCFMSEst  
8.1566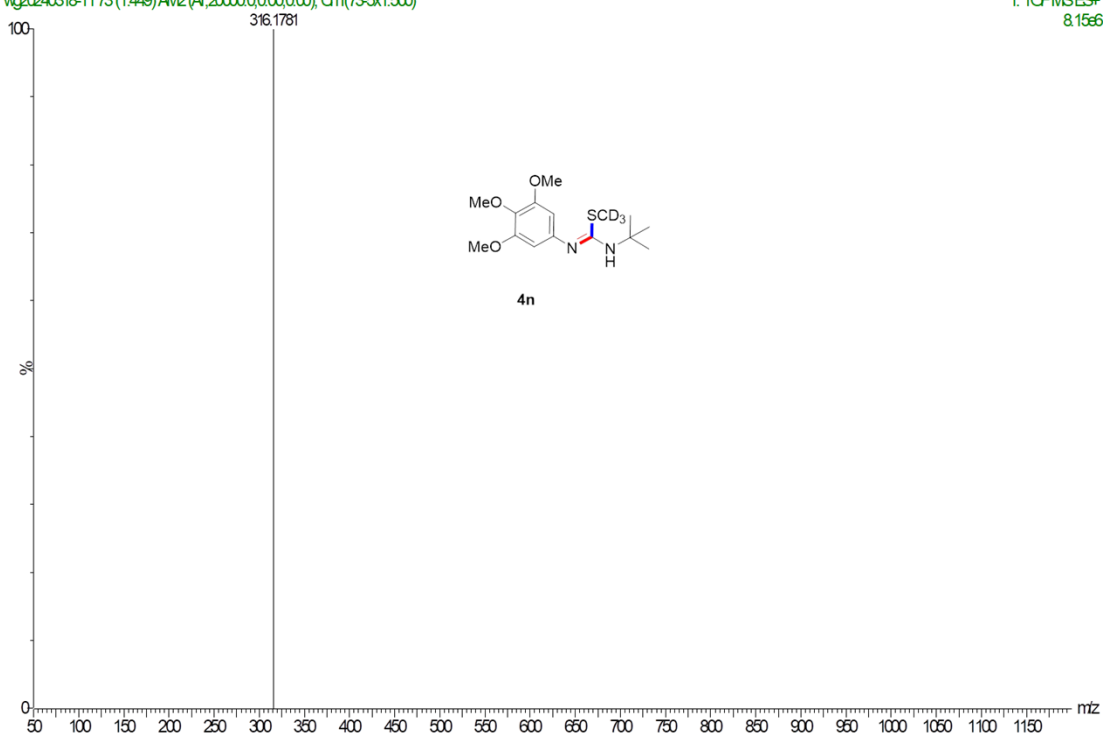

1780

vg20240318-2 65 (1.294) AM2 (Ar,20000,0,0,00,0,00); Cm(65-6x1.500)

1: TCFMSES+  
4.4866

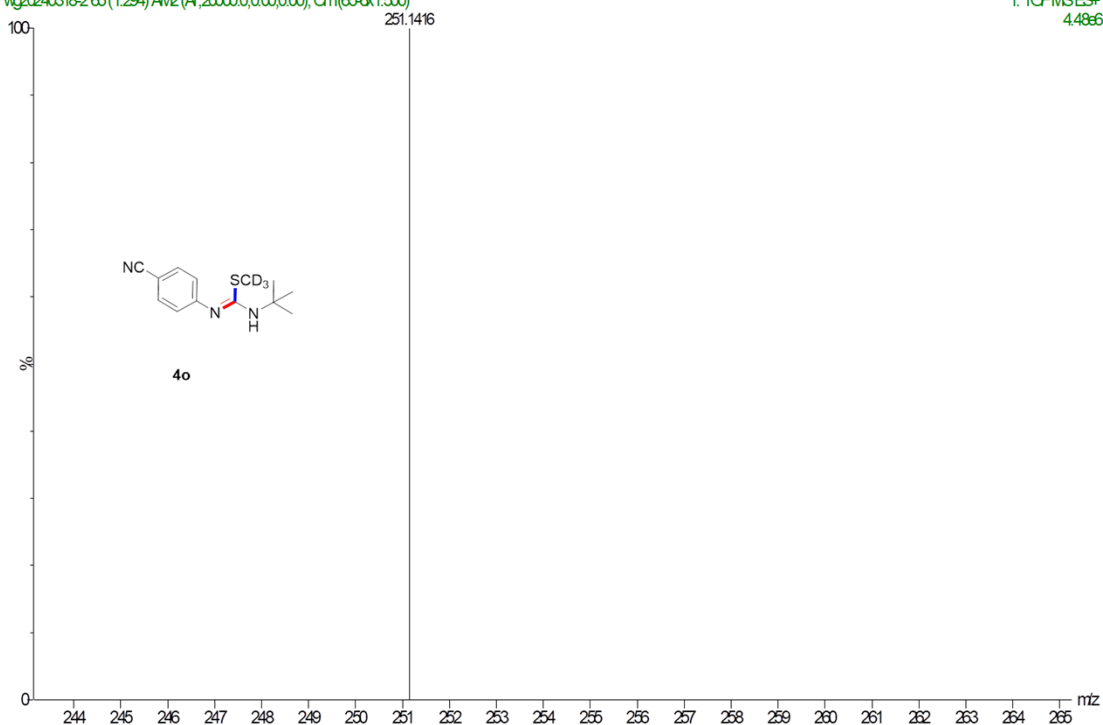

1778

vg20240318-12 72 (1.412) AM2 (Ar,20000,0,0,00,0,00); Cm(72-5x1.500)

1: TCFMSES+  
8.5666

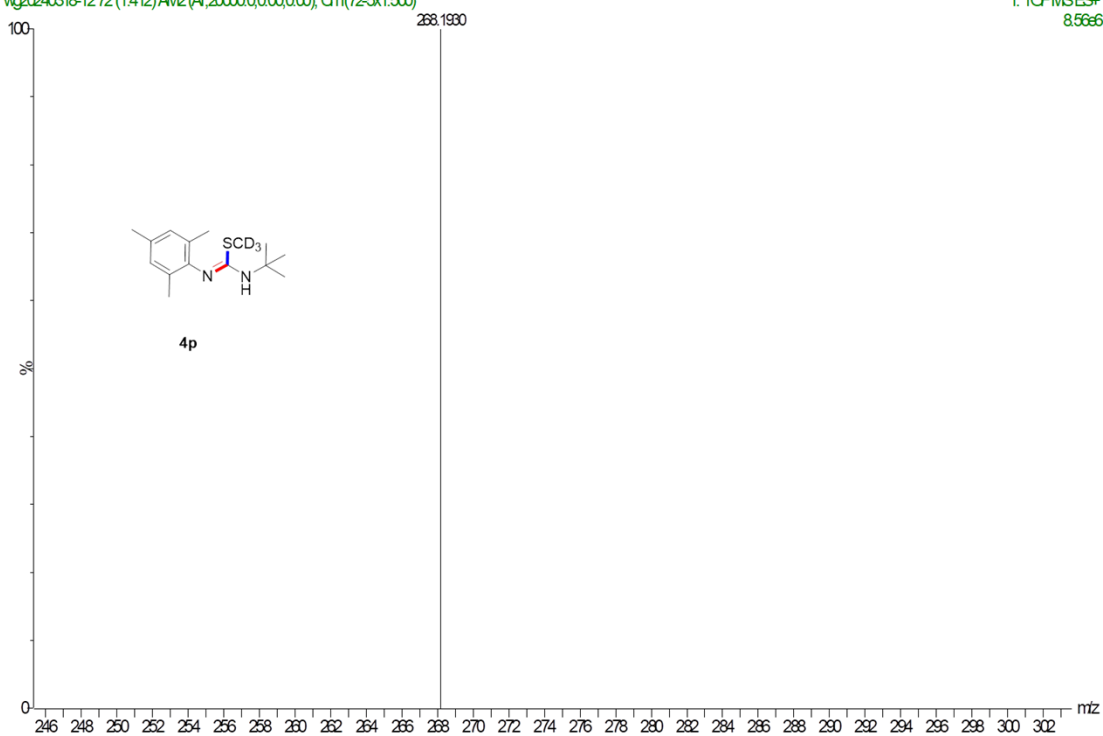

1743

vg20240318-12.67 (1.328) AM2 (Ar,20000.0,0.00,0.00); Cm(67-5x1.500)

1: TCFMSESI+  
1.64e7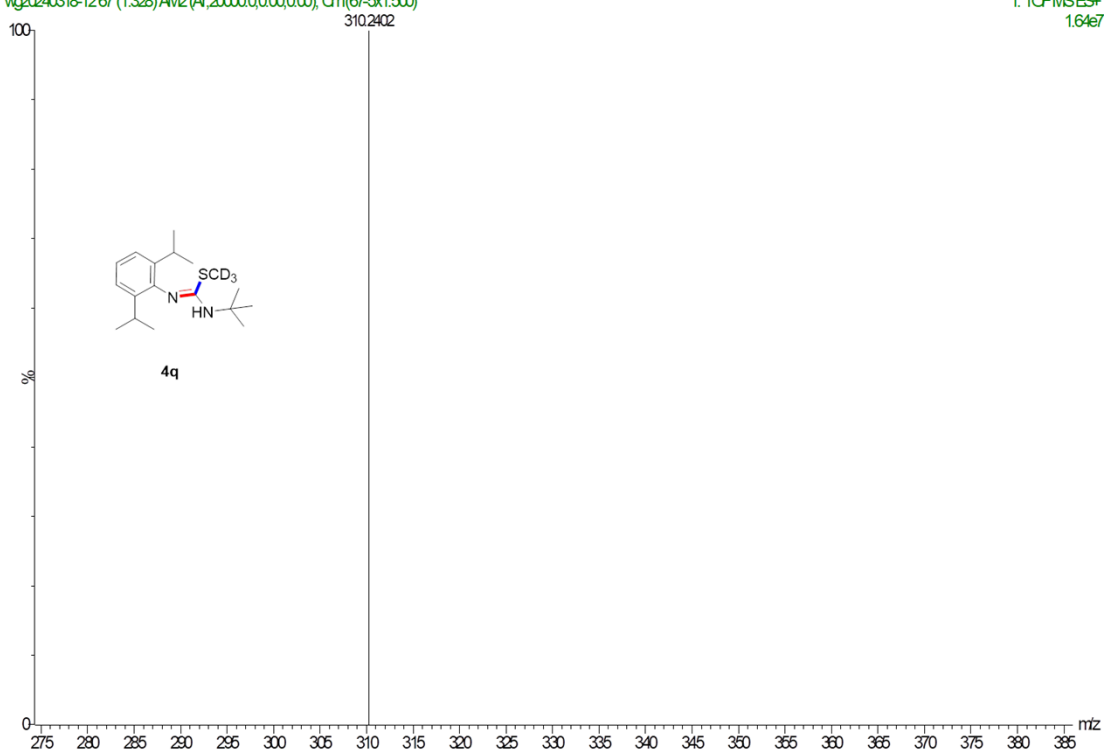

1796

vg20240318-13.74 (1.466) AM2 (Ar,20000.0,0.00,0.00); Cm(74-7x1.500)

1: TCFMSESI+  
8.37e6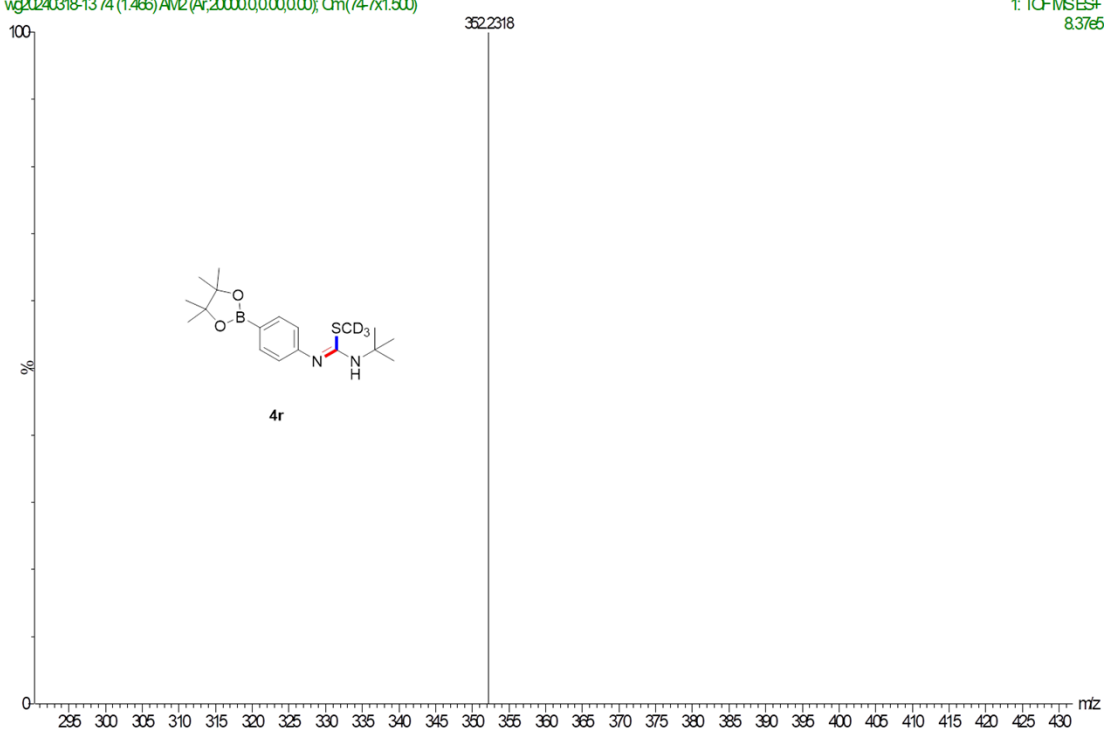

1802

wg20240318-10:38 (0.758) AM2 (Ar,20000.0,0.00,0.00); Cm (38-8x1.500)

1: TCFMSEst  
1.26e7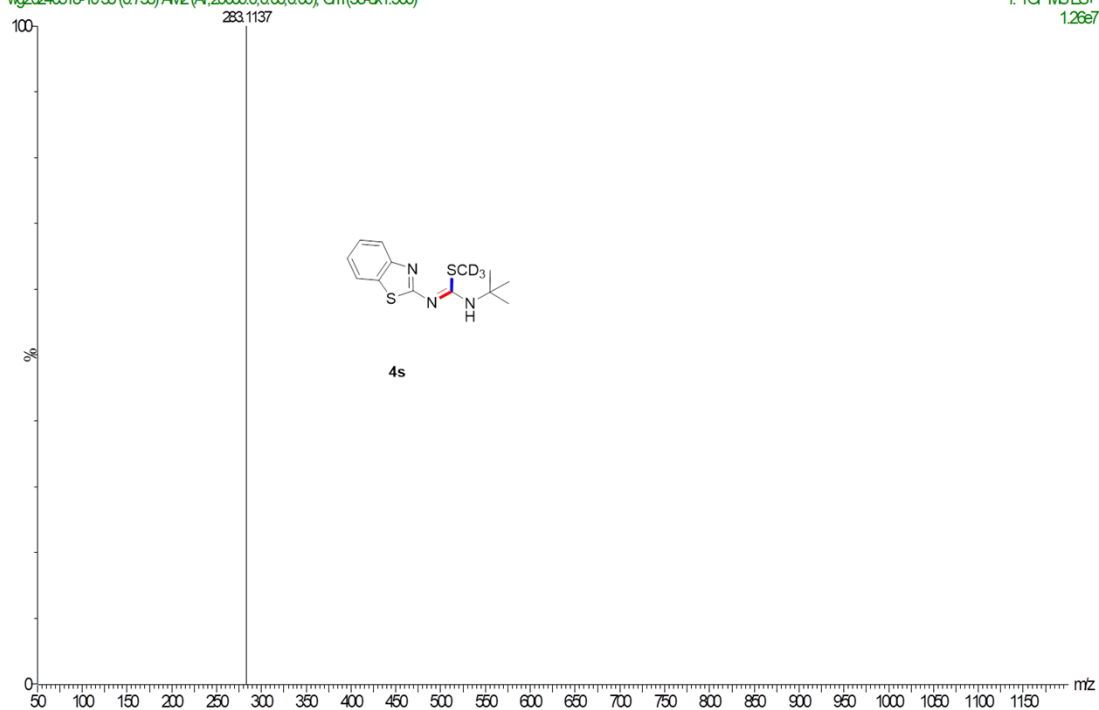

1829

wg20240318-14:64 (1.257) AM2 (Ar,20000.0,0.00,0.00); Cm (64-6x1.500)

1: TCFMSEst  
2.64e6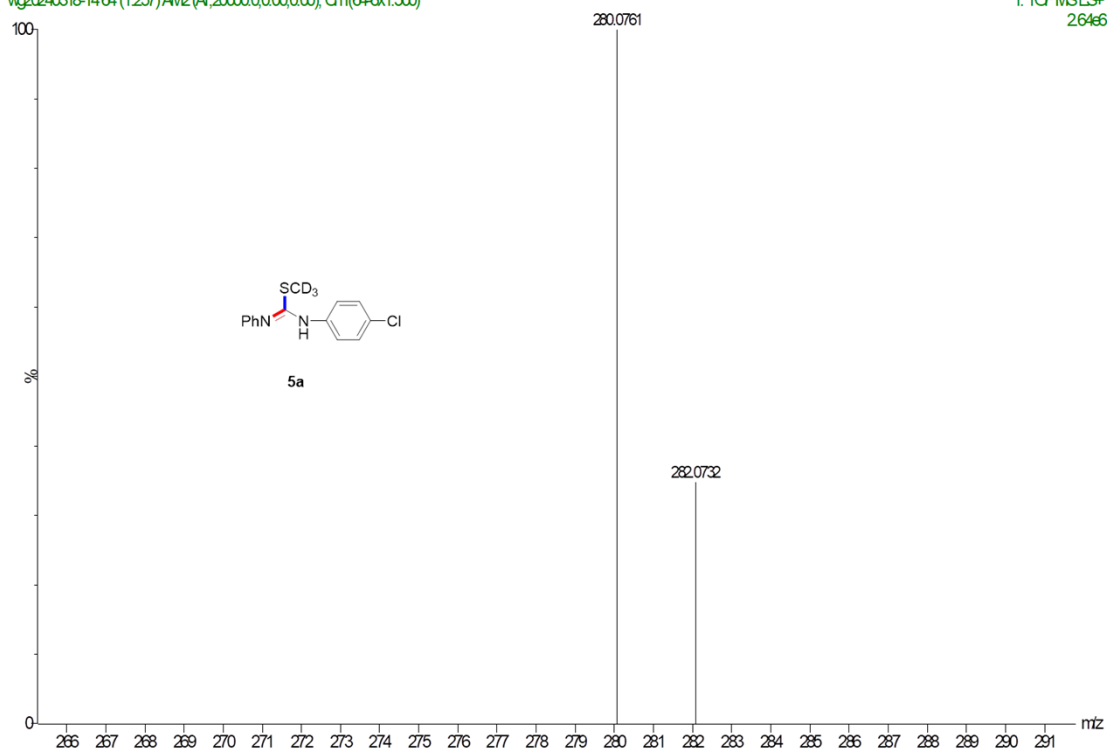

1749

vg20240318-374 (1.466) AM2 (Ar, 20000.0, 0.00, 0.00); Cm (74-7x1.500)

1: TOF MS ES+  
1.06e7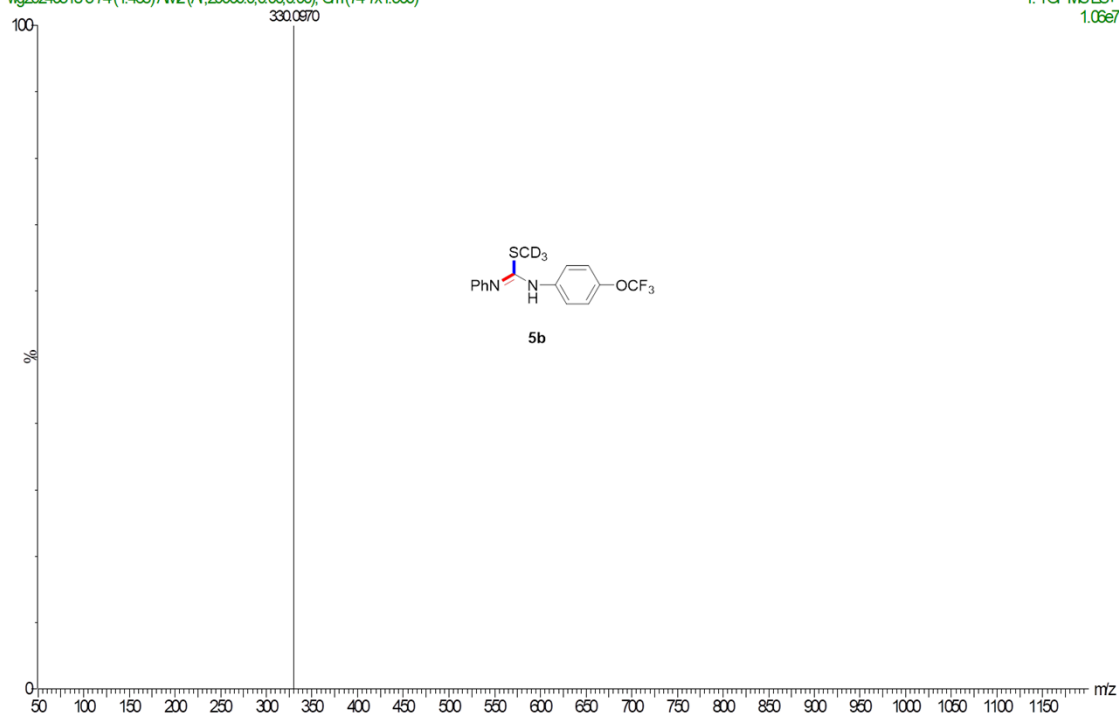

1833

vg20240318-1359 (1.172) AM2 (Ar, 20000.0, 0.00, 0.00); Cm (59.5x1.500)

1: TOF MS ES+  
5.64e6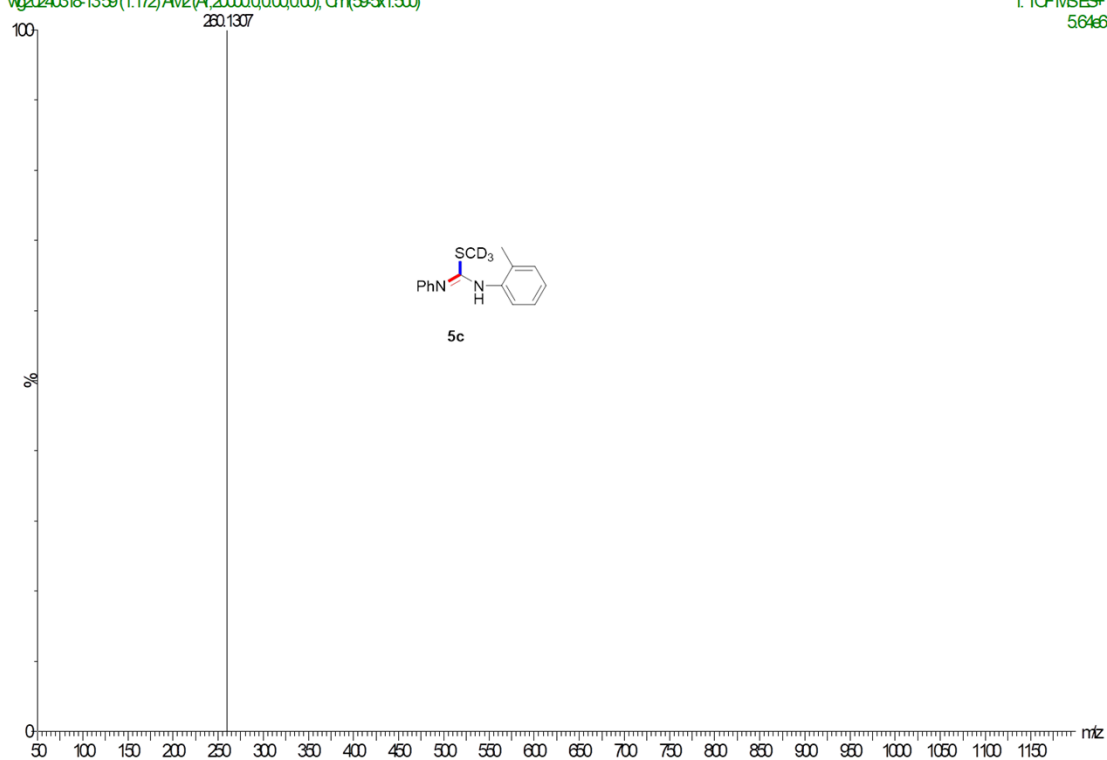

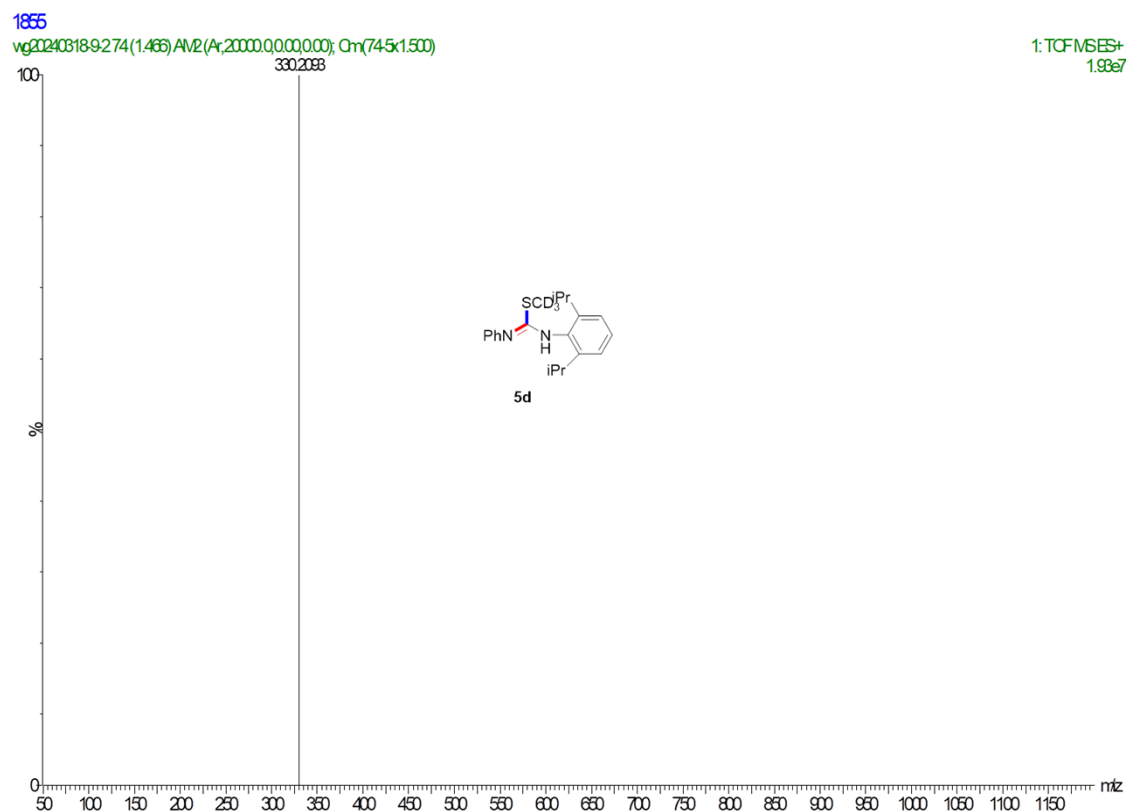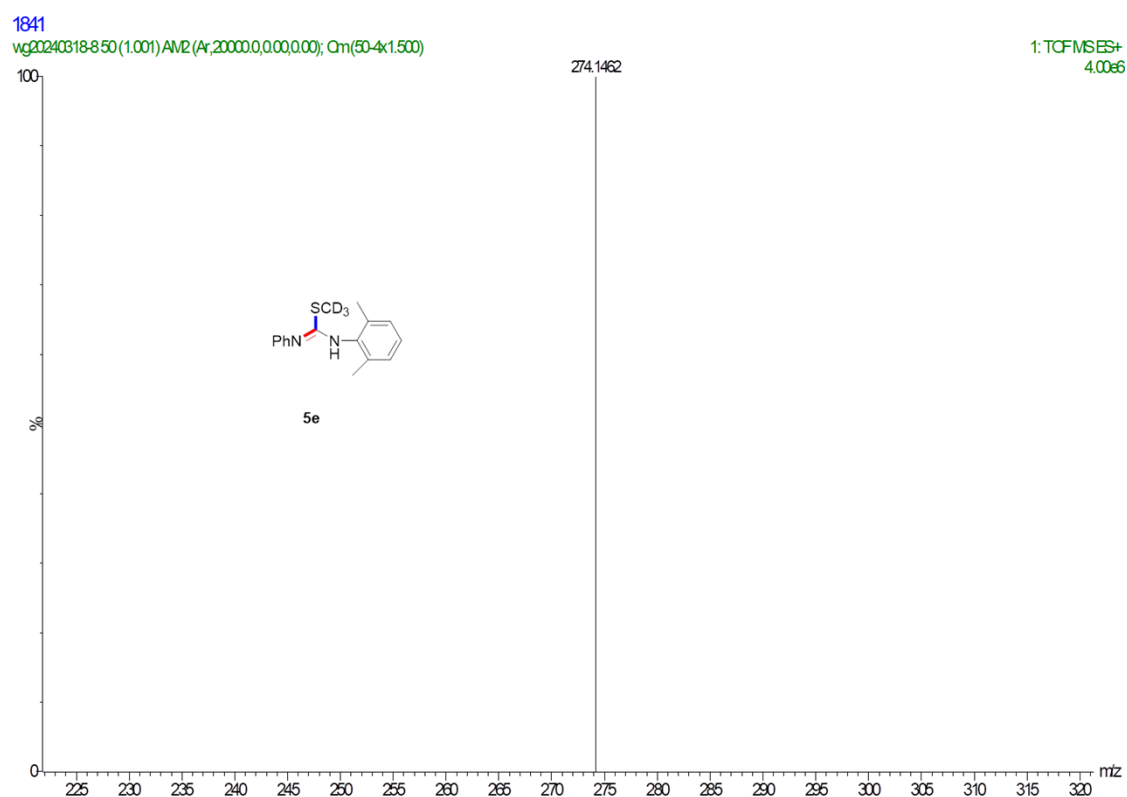

1845

vg20240318-15.40 (0.792) AM2 (Ar,20000,0.0,0.0,0.00); Qm(40-6x1.500)

1: TCFMSEB+  
1.96e7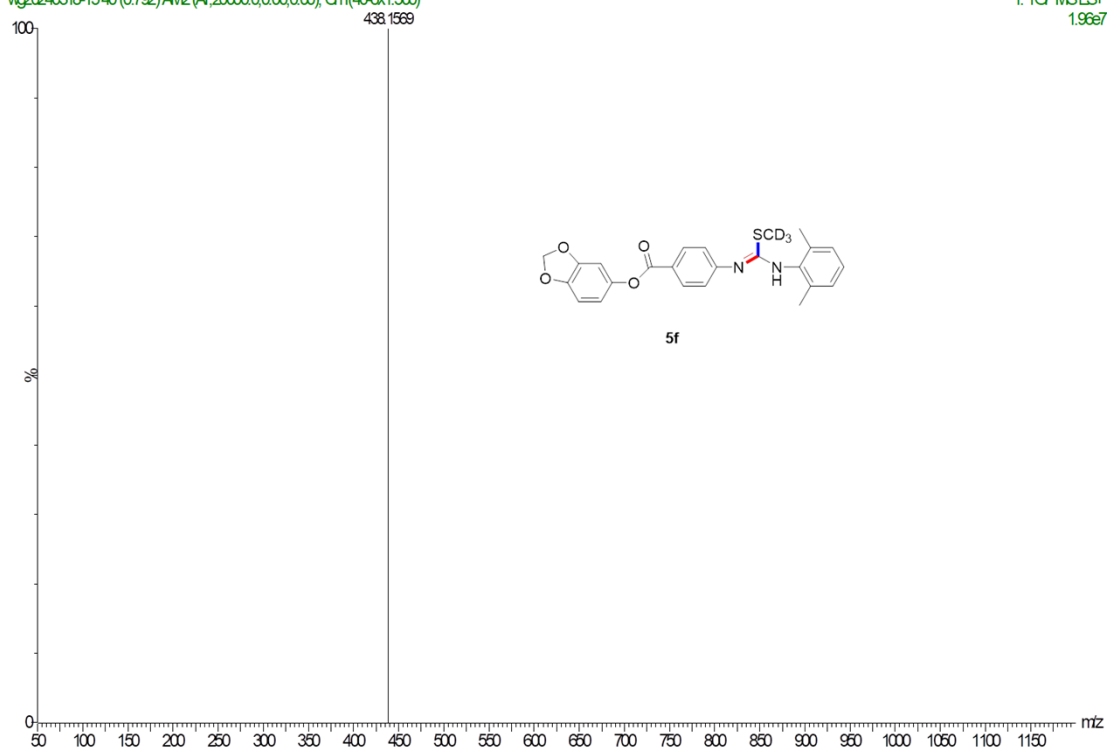

1871

vg20240318-14.57 (1.139) AM2 (Ar,20000,0.0,0.0,0.00); Qm(57-4x1.500)

1: TCFMSEB+  
5.45e6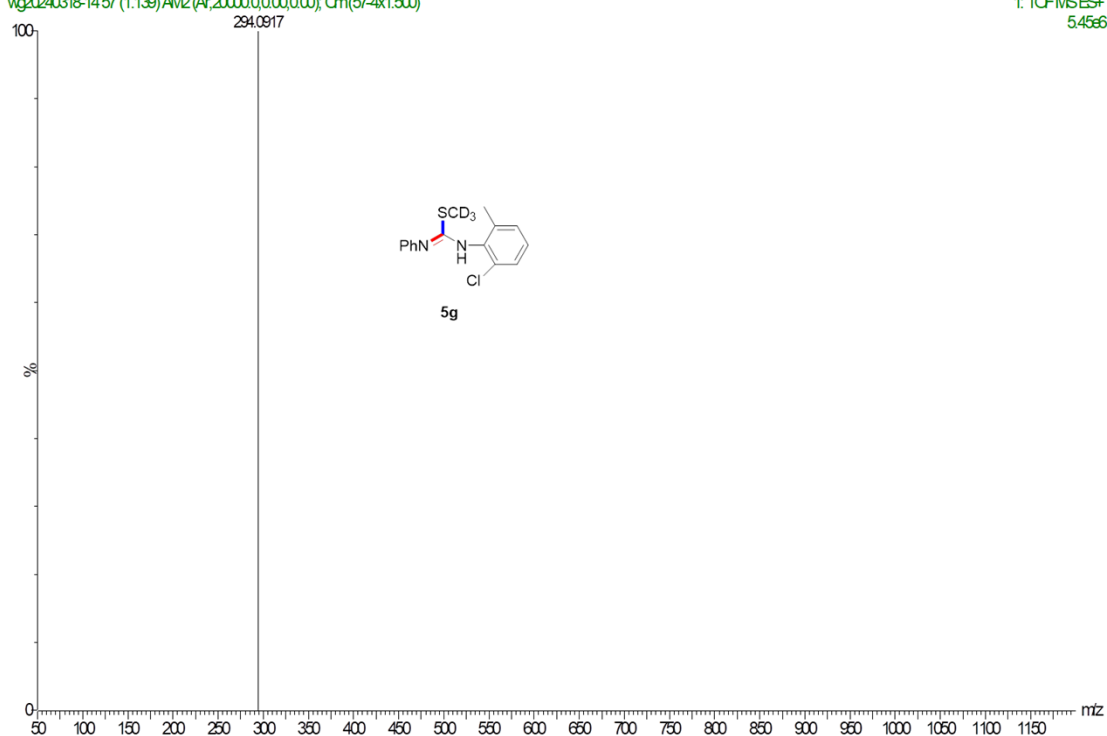

1857

vg20240408-2-29(0.586)AV2 (Ar,20000,0,0,00,0,00); Cm(29-5)

1: TCFMSES+  
1.04e5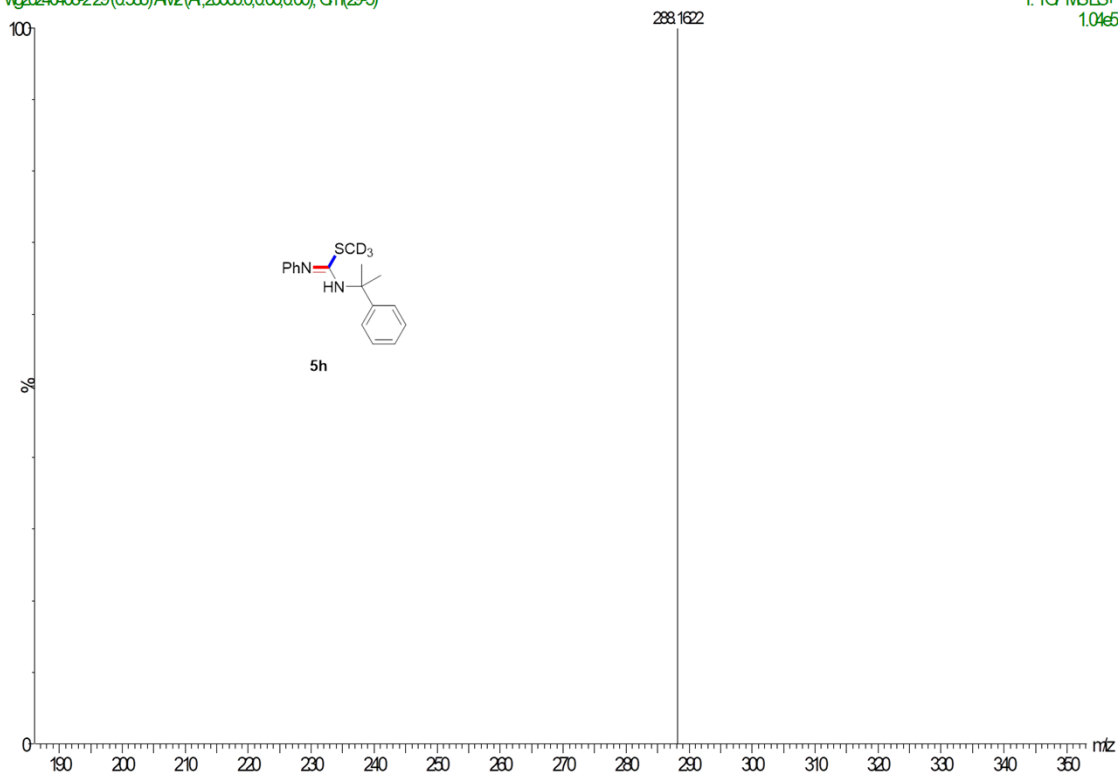

1746

vg20240318-7-66(1.311)AV2 (Ar,20000,0,0,00,0,00); Cm(66-3x1.500)

1: TCFMSES+  
5.49e6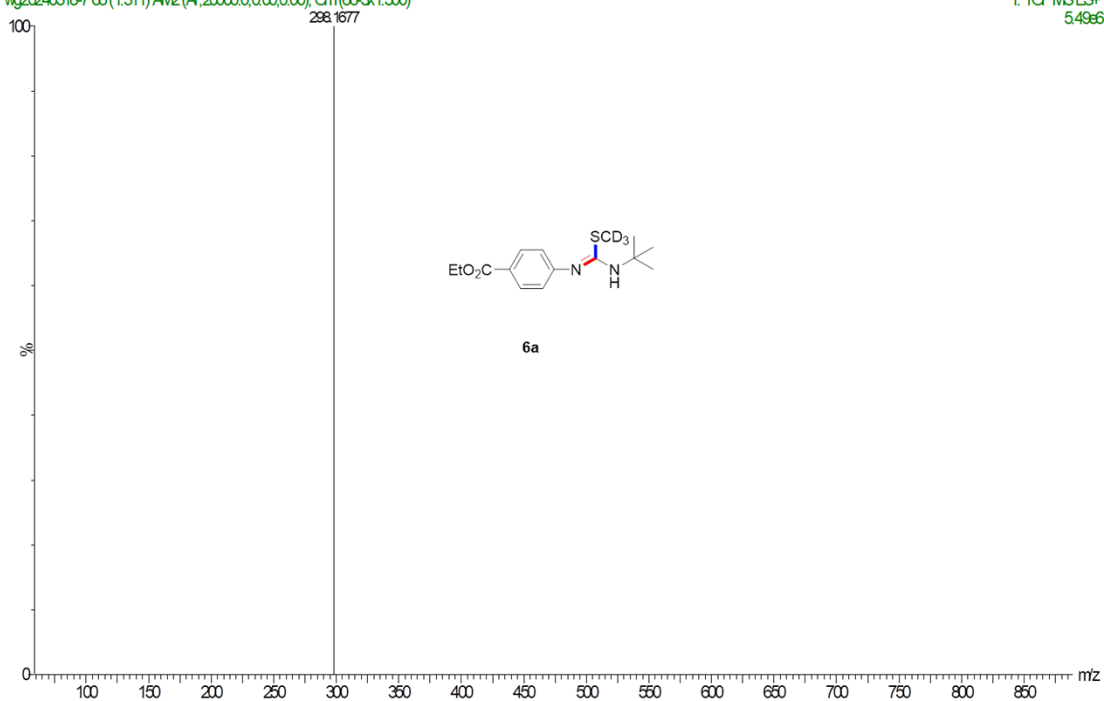

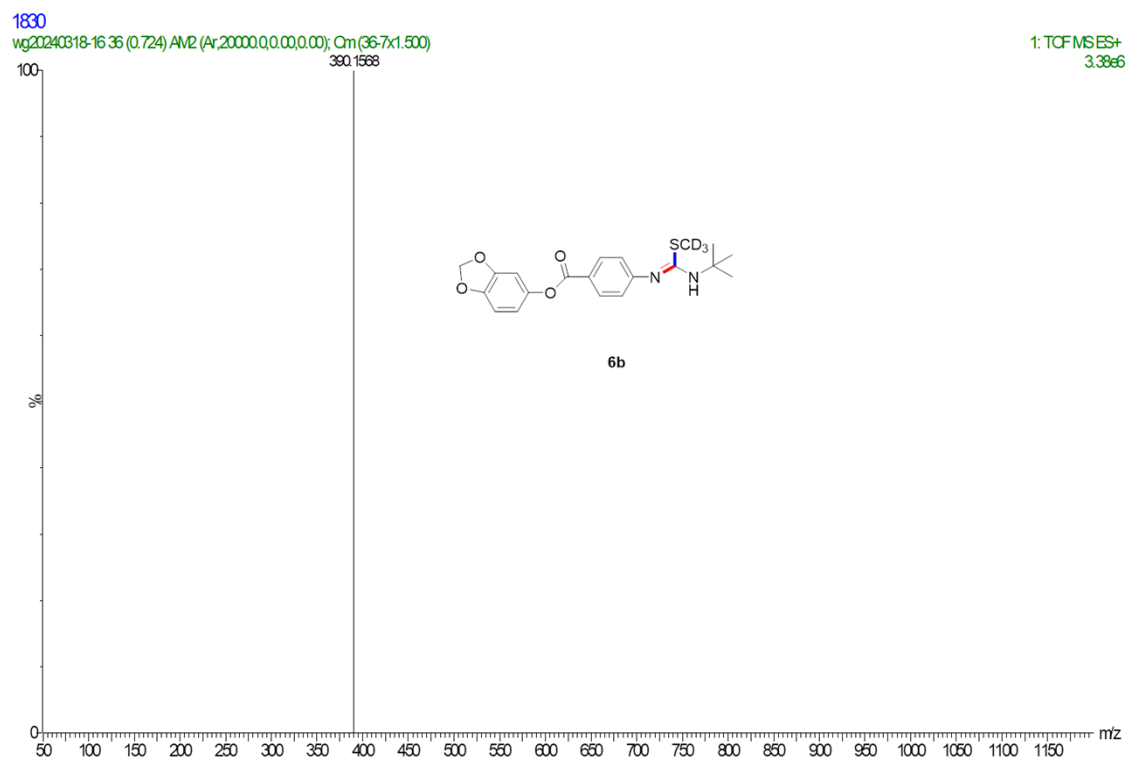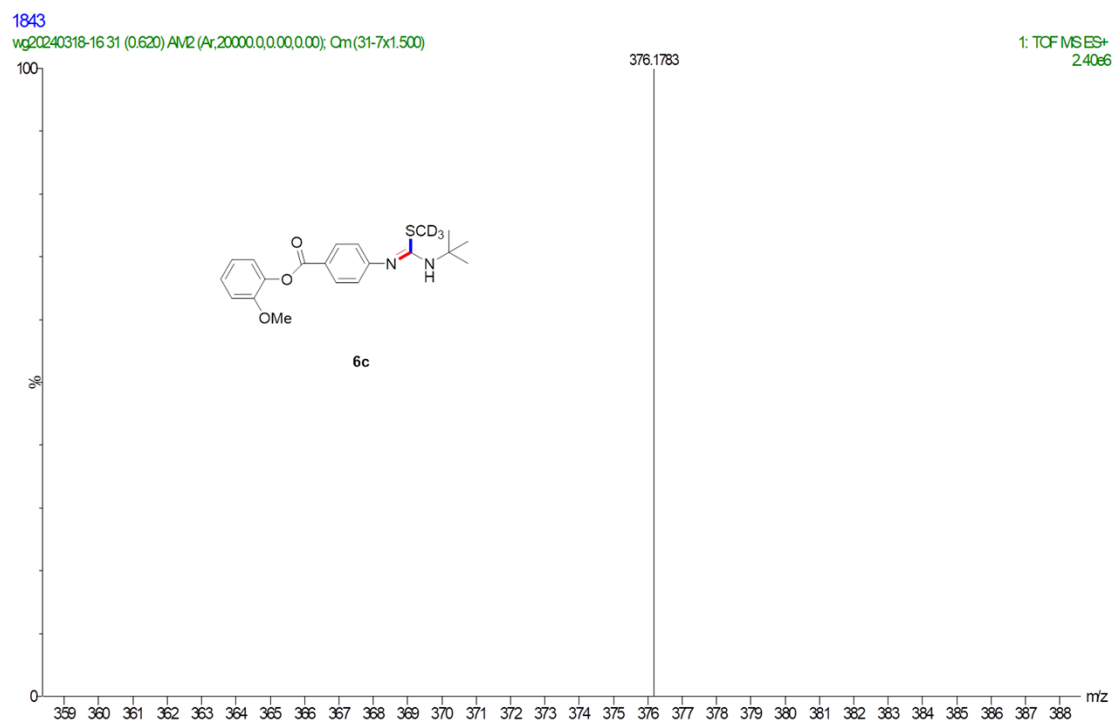

wg20240318-5.66 (1.311) AM2 (Ar,20000.0,0.00,0.00); Cm(66-6x1.500)

1: TOFMS ES+  
1.43e7

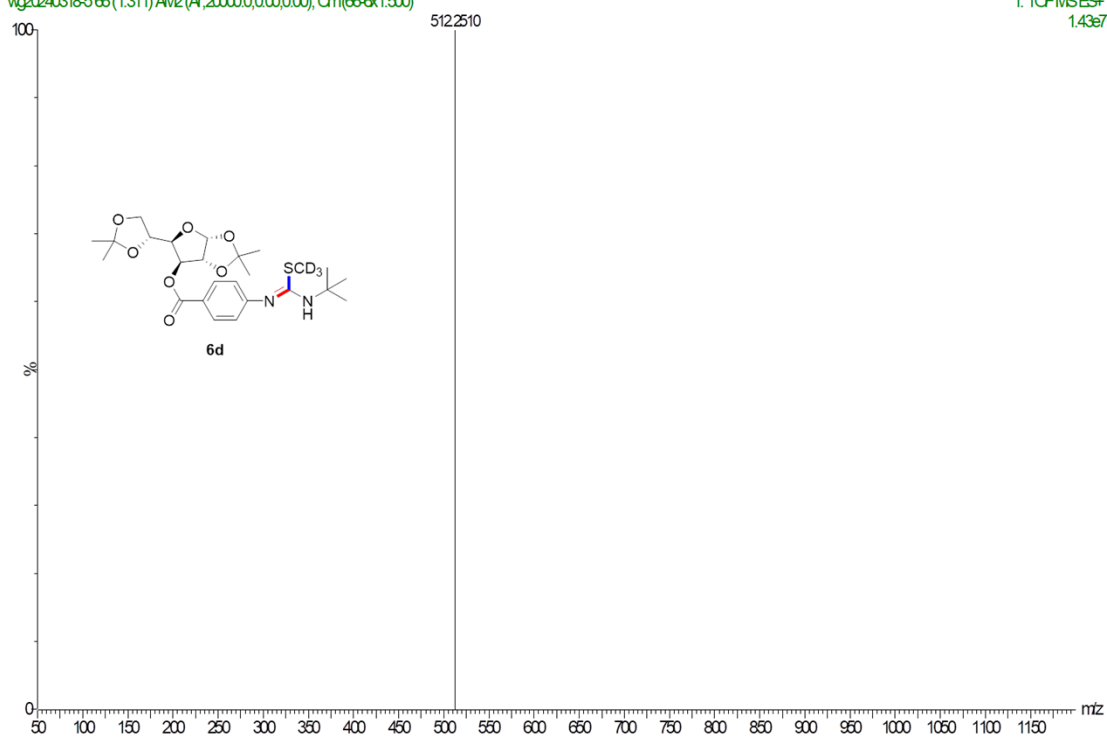

wg20240318-1569 (1.361) AM2 (Ar,20000.0,0.00,0.00); Qm(69-8x1.500)

1: TOFMS ES+  
9.87e5

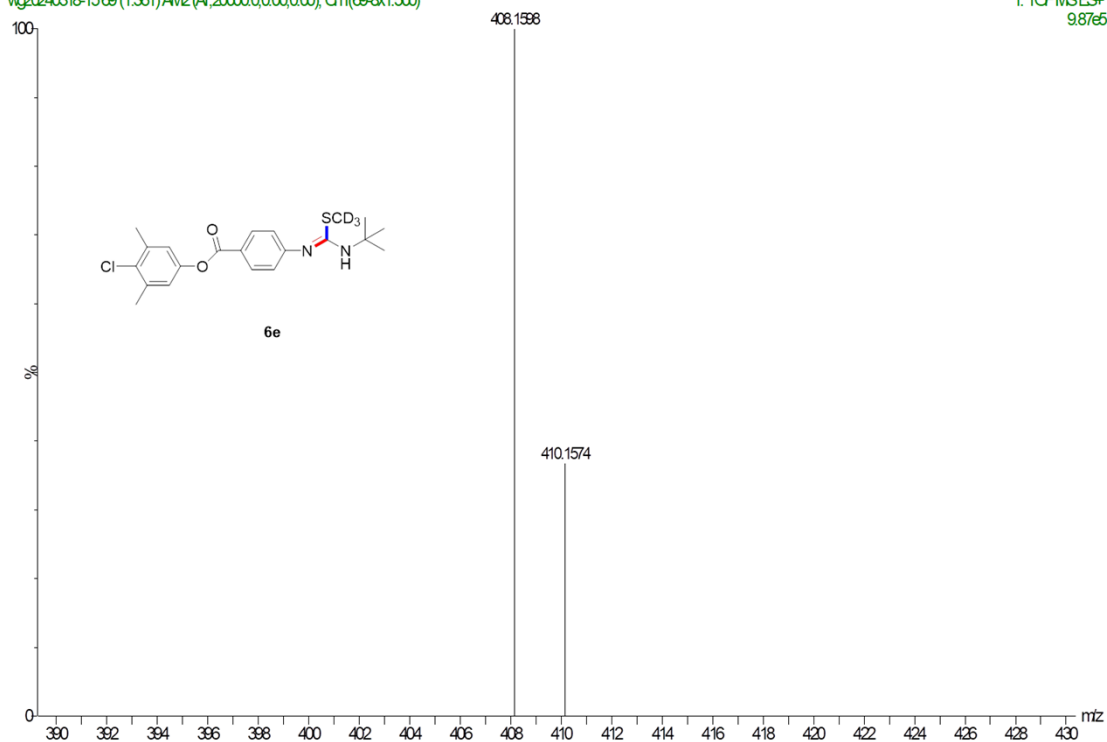

Supplement: d4qo00858h1.pdf [file d4qo00858h1.pdf]
